# Supplementary material for: Photoinduced direct 4-pyridination of C(sp3)–H Bonds
Source: Royal Society of Chemistry journal article supplement (doi:10.1039/c3sc51080h), 2013-01-01
Supplement: c3sc51080h.pdf [file c3sc51080h.pdf]

## Supporting Information

### Photochemically Induced Coupling Reaction of C(sp<sup>3</sup>)-H Bonds and 4-Cyanopyridine

Tamaki Hoshikawa and Masayuki Inoue\*

*Graduate School of Pharmaceutical Sciences, The University of Tokyo,*

*Hongo, Bunkyo-ku, Tokyo 113-0033, Japan*

#### Contents

|                                                                              |     |
|------------------------------------------------------------------------------|-----|
| General Information                                                          | S1  |
| Procedure for Photochemically-Induced Coupling Reaction with 4-Cyanopyridine | S1  |
| Procedure for Photochemically-Induced Coupling Reaction on Gram Scale        | S2  |
| Analytical Data                                                              | S2  |
| NMR Charts                                                                   | S12 |

#### General Information

All reactions sensitive to air or moisture were carried out under argon atmosphere and anhydrous conditions unless otherwise noted. Reagents were used as supplied unless otherwise stated. Analytical thin-layer chromatography (TLC) was performed using E. Merck Silica gel 60 F254 pre-coated plates. Flash column chromatography was generally performed using 40-50 μm Silicagel 60N (Kanto) or 75 μm Activated Alumina (Wako). <sup>1</sup>H and <sup>13</sup>C NMR spectra were recorded on a JEOL JNM-ECX-500 (500 MHz), JNM-ECA-500 (500 MHz), or a JNM-ECS-400 (400 MHz) spectrometer. Chemical shifts are reported in δ (ppm) with reference to residual solvent signals [<sup>1</sup>H-NMR: CDCl<sub>3</sub> (7.26); <sup>13</sup>C-NMR: CDCl<sub>3</sub> (77.0)]. Signal patterns are indicated as s, singlet; d, doublet; t, triplet; q, quartet; m, multiplet; br, broad. IR spectra were recorded on a JASCO FT/IR-4100 spectrometer. ESI-TOF mass spectra were recorded on a BRUKER DALTONICS micrOTOF II or JEOL JMS-T100LP instrument (HRMS). UV irradiation was carried out by using a Riko 100 W medium-pressure mercury lamp.

#### Procedure for Photochemically-Induced Coupling Reaction with 4-Cyanopyridine

To a MeCN/H<sub>2</sub>O (2:1, 0.04 M) solution of 4-cyanopyridine **2** (16.3 mg, 157 μmol) in a test tube were added benzophenone (14.3 mg, 78.5 μmol) and cumene **1a** (44 μL, 313 μmol) at room temperature. The mixture was degassed by freeze-thaw procedure for 3 times. The test tube was placed at 5 cm distance from a UV-lamp and irradiated with a Riko 100 W medium-pressure mercury lamp at room temperature for 12 h. Then, the reaction mixture was treated with saturated aqueous sodium bicarbonate. The mixture was extracted with AcOEt (20 mL x 3), washed with brine, dried over Na<sub>2</sub>SO<sub>4</sub>, and concentrated. The analysis of crude's <sup>1</sup>H NMR chart indicated that the desired product **3a** was formed in 92% yield along with the formation of α,α-diphenyl-4-pyridylmethanol **4** in 7% yield. The residue was purified with flash column chromatography (hexane/AcOEt 5:1) to give the

pyridine derivative **3a** in 90% yield (27.7 mg).

### **Procedure for Photochemically-Induced Coupling Reaction on a Gram Scale**

To a MeCN/H<sub>2</sub>O (2:1, 0.4 M) solution of 4-cyanopyridine **2** (1.03 g, 9.89 mmol) in a 50 mL flask were added benzophenone (180 mg, 0.989 mmol) and cumene **1a** (2.76 mL, 19.8 mmol) at room temperature. The mixture was degassed by freeze-thaw procedure for 3 times. The flask was placed at 5 cm distance from a UV-lamp and irradiated with a Riko 100 W medium-pressure mercury lamp at room temperature for 160 h. Then, the reaction mixture was treated with saturated aqueous sodium bicarbonate. The mixture was extracted with AcOEt (40 mL x 3), washed with brine, dried over Na<sub>2</sub>SO<sub>4</sub>, and concentrated. The residue was purified with flash column chromatography (hexane/AcOEt 5:1) to give the pyridine derivative **3a** in 78% yield (1.52 g) along with the recovery of 4-cyanopyridine **2** in 10% yield (100 mg).

### **Analytical Data**

#### ***4-(2-phenylpropan-2-yl)pyridine (3a):***

90% yield (27.7 mg); colorless oil; IR (neat) 1596, 1491, 1410, 824, 765, 700 cm<sup>-1</sup>; <sup>1</sup>H NMR (400 MHz, CDCl<sub>3</sub>) δ 1.68 (6H, s), 7.13 (2H, dd, *J* = 1.4, 4.6 Hz), 7.18-7.25 (3H, m), 7.29 (2H, m), 8.48 (2H, d, *J* = 6.0 Hz); <sup>13</sup>C NMR (100 MHz, CDCl<sub>3</sub>) δ 29.9, 42.8, 122.1, 126.2, 126.6, 128.2, 148.6, 149.5, 159.6; HRMS (ESI-TOF) calcd for C<sub>14</sub>H<sub>16</sub>N (M+H)<sup>+</sup> 198.1277, found 198.1301.

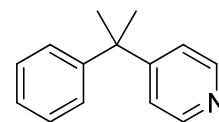

#### ***4-(1-phenylbutyl)pyridine (3b):***

72% yield (23.8 mg); colorless oil; IR (neat) 1596, 1494, 1452, 1414, 815, 743, 700 cm<sup>-1</sup>; <sup>1</sup>H NMR (400 MHz, CDCl<sub>3</sub>) δ 0.93 (3H, t, *J* = 7.4 Hz), 1.28 (2H, m), 2.01 (2H, m), 3.88 (1H, t, *J* = 7.8 Hz), 7.15 (2H, dd, *J* = 1.4, 4.6 Hz), 7.18-7.24 (3H, m), 7.30 (2H, m), 8.47 (2H, d, *J* = 6.0 Hz); <sup>13</sup>C NMR (100 MHz, CDCl<sub>3</sub>) δ 13.9, 20.9, 37.1, 50.5, 123.3, 126.6, 127.9, 128.6, 143.3, 149.7, 154.2; HRMS (ESI-TOF) calcd for C<sub>15</sub>H<sub>18</sub>N (M+H)<sup>+</sup> 212.1434, found 212.1435.

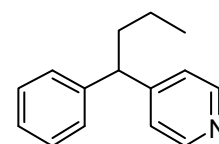

#### ***4-(1-(4-methoxyphenyl)butyl)pyridine (3c):***

83% yield (29.4 mg); colorless oil; IR (neat) 1598, 1511, 1462, 1415, 1249, 1035, 824 cm<sup>-1</sup>; <sup>1</sup>H NMR (400 MHz, CDCl<sub>3</sub>) δ 0.92 (3H, t, *J* = 7.3 Hz), 1.26 (2H, m), 1.98 (2H, m), 3.77 (3H, s), 3.83 (1H, t, *J* = 7.8 Hz), 6.83 (2H, dd, *J* = 2.3, 6.4 Hz), 7.10-7.15 (4H, m), 8.46 (2H, dd, *J* = 1.6, 4.6 Hz); <sup>13</sup>C NMR (100 MHz, CDCl<sub>3</sub>) δ 13.9, 20.9, 37.2, 49.6, 55.2, 113.9, 123.1, 128.7, 135.3, 149.6, 154.7, 158.2; HRMS (ESI-TOF) calcd for C<sub>16</sub>H<sub>20</sub>NO (M+H)<sup>+</sup> 242.1539, found 242.1537.

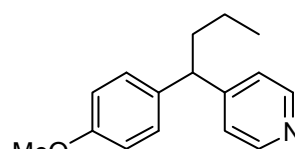

**4-(1-(pyridin-4-yl)butyl)phenyl acetate (3d):**

71% yield (35.7 mg); colorless oil; IR (neat) 1761, 1597, 1504, 1415, 1201, 824  $\text{cm}^{-1}$ ;  $^1\text{H}$  NMR (400 MHz,  $\text{CDCl}_3$ )  $\delta$  0.91 (3H, t,  $J = 7.3$  Hz), 1.26 (2H, m), 1.98 (2H, q,  $J = 7.8$  Hz), 2.27 (3H, s), 3.87 (1H, t,  $J = 7.8$  Hz), 7.01 (2H, dd,  $J = 2.3, 6.9$  Hz), 7.13 (2H, dd,  $J = 1.4, 4.6$  Hz), 7.20 (2H, dd,  $J = 2.3, 6.9$  Hz), 8.48 (2H, dd,  $J = 1.4, 4.6$  Hz);  $^{13}\text{C}$  NMR (100 MHz,  $\text{CDCl}_3$ )  $\delta$  13.9, 20.8, 21.1, 37.1, 49.8, 121.6, 123.2, 128.7, 140.8, 149.2, 149.8, 153.8, 169.4; HRMS (ESI-TOF) calcd for  $\text{C}_{17}\text{H}_{20}\text{NO}_2$  ( $\text{M}+\text{H}$ ) $^+$  270.1489, found 270.1484.

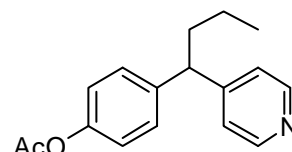

**N-(4-(1-(pyridin-4-yl)butyl)phenyl)acetamide (3e):**

63% yield (28.1 mg); colorless oil; IR (neat) 3254, 1668, 1602, 1538, 1513, 1413, 826  $\text{cm}^{-1}$ ;  $^1\text{H}$  NMR (400 MHz,  $\text{CDCl}_3$ )  $\delta$  0.92 (3H, t,  $J = 7.3$  Hz), 1.26 (2H, m), 1.98 (2H, q,  $J = 7.8$  Hz), 2.15 (3H, s), 3.86 (1H, t,  $J = 7.8$  Hz), 7.10-7.20 (4H, m), 7.35 (1H, brs), 7.43 (2H, d,  $J = 8.2$  Hz), 8.48 (2H, d,  $J = 5.0$  Hz);  $^{13}\text{C}$  NMR (100 MHz,  $\text{CDCl}_3$ )  $\delta$  13.9, 20.8, 24.4, 37.0, 49.8, 120.2, 123.3, 128.3, 136.6, 138.9, 149.4, 154.5, 168.5; HRMS (ESI-TOF) calcd for  $\text{C}_{17}\text{H}_{21}\text{N}_2\text{O}$  ( $\text{M}+\text{H}$ ) $^+$  269.1648, found 269.1633.

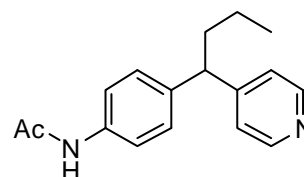

**methyl 4-(1-(pyridin-4-yl)butyl)benzoate (3f):**

65% yield (27.6 mg); colorless oil; IR (neat) 1721, 1596, 1436, 1415, 1281, 1112  $\text{cm}^{-1}$ ;  $^1\text{H}$  NMR (500 MHz,  $\text{CDCl}_3$ )  $\delta$  0.93 (3H, t,  $J = 7.8$  Hz), 1.27 (2H, sextet,  $J = 7.8$  Hz), 2.02 (2H, q,  $J = 7.8$  Hz), 3.89 (3H, s), 3.94 (1H, t,  $J = 7.8$  Hz), 7.13 (2H, d,  $J = 5.8$  Hz), 7.27 (2H, d,  $J = 8.0$  Hz), 7.26 (2H, d,  $J = 8.0$  Hz), 8.49 (2H, d,  $J = 5.8$  Hz);  $^{13}\text{C}$  NMR (125 MHz,  $\text{CDCl}_3$ )  $\delta$  13.9, 20.9, 36.9, 50.5, 52.1, 123.2, 127.9, 128.7, 130.0, 148.5, 149.8, 153.3, 166.8; HRMS (ESI-TOF) calcd for  $\text{C}_{17}\text{H}_{20}\text{NO}_2$  ( $\text{M}+\text{H}$ ) $^+$  270.1489, found 270.1481.

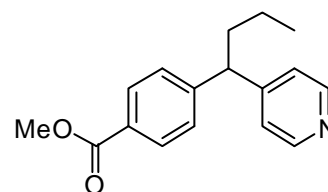

**4-(1-(4-bromophenyl)butyl)pyridine (3g):**

68% yield (29.7 mg); yellow oil; IR (neat) 1596, 1485, 1412, 1072, 811  $\text{cm}^{-1}$ ;  $^1\text{H}$  NMR (400 MHz,  $\text{CDCl}_3$ )  $\delta$  0.92 (3H, t,  $J = 7.8$  Hz), 1.26 (2H, m), 1.97 (2H, m), 3.84 (1H, t,  $J = 7.8$  Hz), 7.07 (2H, d,  $J = 8.7$  Hz), 7.11 (2H, d,  $J = 6.0$  Hz), 7.41 (2H, d,  $J = 8.7$  Hz), 8.48 (2H, d,  $J = 6.0$  Hz);  $^{13}\text{C}$  NMR (100 MHz,  $\text{CDCl}_3$ )  $\delta$  13.9, 20.8, 36.9, 49.8, 120.5, 123.1, 129.6, 131.7, 142.3, 149.8, 153.5; HRMS (ESI-TOF) calcd for  $\text{C}_{15}\text{H}_{17}\text{NBr}$  ( $\text{M}+\text{H}$ ) $^+$  290.0539, found 290.0532.

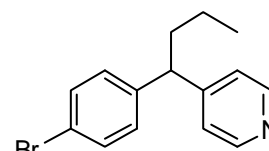

**4-(1-(4-chlorophenyl)butyl)pyridine (3h):**

70% yield (25.1 mg); yellow oil; IR (neat) 1596, 1490, 1462, 1412, 1092, 814  $\text{cm}^{-1}$ ;  $^1\text{H}$  NMR

(400 MHz, CDCl<sub>3</sub>) δ 0.92 (3H, t, *J* = 7.3 Hz), 1.26 (2H, m), 1.98 (2H, m), 3.85 (1H, t, *J* = 7.8 Hz), 7.10-7.15 (4H, m), 7.27 (2H, m), 8.48 (2H, d, *J* = 1.4, 4.6 Hz); <sup>13</sup>C NMR (100 MHz, CDCl<sub>3</sub>) δ 13.9, 20.8, 37.0, 49.8, 123.1, 128.7, 129.2, 132.4, 141.7, 149.8, 153.6; HRMS (ESI-TOF) calcd for C<sub>15</sub>H<sub>17</sub>NCl (M+H)<sup>+</sup> 246.1044, found 246.1035.

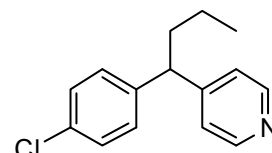

**4-phenyl-4-(pyridin-4-yl)butyl benzoate (3i):**

79% yield (38.8 mg); colorless oil; IR (neat) 1715, 1597, 1494, 1452, 1415, 1275, 1117, 713 cm<sup>-1</sup>; <sup>1</sup>H NMR (400 MHz, CDCl<sub>3</sub>) δ 1.75 (2H, m), 1.27 (2H, m), 3.95 (1H, t, *J* = 7.8 Hz), 4.33 (2H, dt, *J* = 0.9, 6.0 Hz), 7.20 (2H, dd, *J* = 1.4, 4.6 Hz), 7.23 (3H, m), 7.32 (2H, m), 7.44 (2H, t, *J* = 7.3 Hz), 7.56 (1H, t, *J* = 7.3 Hz), 8.01 (2H, d, *J* = 7.3 Hz), 8.50 (2H, dd, *J* = 1.4, 4.6 Hz); <sup>13</sup>C NMR (100 MHz, CDCl<sub>3</sub>) δ 27.1, 31.3, 50.3, 64.4, 123.1, 126.9, 127.8, 128.3, 128.8, 129.5, 130.2, 132.9, 142.5, 149.8, 153.6, 166.5; HRMS (ESI-TOF) calcd for C<sub>22</sub>H<sub>22</sub>NO<sub>2</sub> (M+H)<sup>+</sup> 332.1645, found 332.1629.

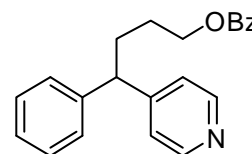

**methyl 5-phenyl-5-(pyridin-4-yl)pentanoate (3j):**

83% yield (28.4 mg); colorless oil; IR (neat) 1735, 1596, 1494, 1452, 1415, 1200, 744, 701 cm<sup>-1</sup>; <sup>1</sup>H NMR (400 MHz, CDCl<sub>3</sub>) δ 1.59 (2H, m), 2.07 (2H, m), 2.34 (2H, t, *J* = 7.3 Hz), 3.65 (3H, s), 3.88 (1H, t, *J* = 7.8 Hz), 7.15 (2H, d, *J* = 1.8, 4.6 Hz), 7.21 (3H, m), 7.30 (2H, m), 8.47 (2H, d, *J* = 1.8, 4.6 Hz); <sup>13</sup>C NMR (100 MHz, CDCl<sub>3</sub>) δ 23.2, 33.7, 34.2, 50.6, 51.5, 123.1, 126.8, 127.8, 128.7, 142.7, 149.8, 153.6, 173.6; HRMS (ESI-TOF) calcd for C<sub>17</sub>H<sub>20</sub>NO<sub>2</sub> (M+H)<sup>+</sup> 270.1489, found 270.1476.

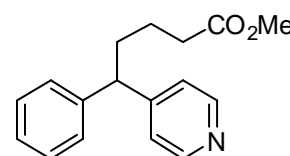

**4-(1-(4-bromophenyl)butyl)pyridine (3k):**

62% yield (27.8 mg); yellow oil; IR (neat) 1595, 1494, 1452, 1414, 743, 701 cm<sup>-1</sup>; <sup>1</sup>H NMR (400 MHz, CDCl<sub>3</sub>) δ 1.82 (2H, m), 2.22 (2H, m), 3.40 (2H, t, *J* = 6.4 Hz), 3.89 (1H, t, *J* = 7.8 Hz), 7.16 (2H, dd, *J* = 1.8, 4.6 Hz), 7.22 (3H, m), 7.31 (2H, m), 8.50 (2H, d, *J* = 1.8, 4.6 Hz); <sup>13</sup>C NMR (100 MHz, CDCl<sub>3</sub>) δ 30.8, 33.3, 33.4, 50.0, 123.0, 126.9, 127.8, 128.8, 142.4, 149.9, 153.4; HRMS (ESI-TOF) calcd for C<sub>15</sub>H<sub>17</sub>NBr (M+H)<sup>+</sup> 290.0539, found 290.0525.

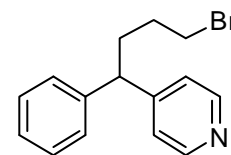

**4-benzylpyridine (3l):** [CAS: 2116-65-6]:<sup>1</sup>

51% yield (17.0 mg); colorless oil; <sup>1</sup>H NMR (400 MHz, CDCl<sub>3</sub>) δ 3.97 (2H, s), 7.10 (2H, dd, *J* = 1.8, 4.6 Hz), 7.17 (2H, d, *J* = 7.3 Hz), 7.25 (1H, t,

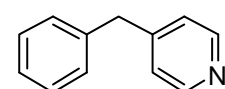

(1) Wu, G. G.; Chen, F. X.; LaFrance, D.; Liu, Z.; Greene, S. G.; Wong, Y.-S.; Xie, J. *Org. Lett.* **2011**, *13*, 5220.

$J = 7.8$  Hz), 7.32 (2H, m), 8.49 (2H, dd,  $J = 1.8, 4.6$  Hz);  $^{13}\text{C}$  NMR (100 MHz,  $\text{CDCl}_3$ )  $\delta$  41.2, 124.2, 126.7, 128.7, 129.0, 138.8, 149.7, 150.0.

**4-(1-phenylcyclohexyl)pyridine (3m):**

50% yield (23.5 mg); colorless oil; IR (neat) 1593, 1494, 1449, 1411, 810, 759, 699  $\text{cm}^{-1}$ ;  $^1\text{H}$  NMR (400 MHz,  $\text{CDCl}_3$ )  $\delta$  1.45-1.65 (6H, m), 2.20-2.35 (4H, m), 7.15-7.20 (3H, m), 7.25-7.35 (4H, m), 8.47 (2H, d,  $J = 6.4$  Hz);  $^{13}\text{C}$  NMR (100 MHz,  $\text{CDCl}_3$ )  $\delta$  22.6, 26.1, 36.3, 46.1, 122.4, 126.0, 127.0, 128.5, 146.5, 149.7, 157.8; HRMS (ESI-TOF) calcd for  $\text{C}_{17}\text{H}_{20}\text{N}$  ( $\text{M}+\text{H}$ ) $^+$  238.1596, found 238.1608.

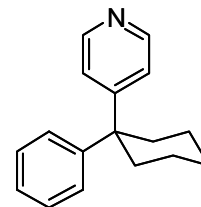

**3-(1-(pyridin-4-yl)ethyl)phenyl acetate (3n):**

83% yield (27.3 mg); colorless oil; IR (neat) 1765, 1595, 1486, 1442, 1414, 1203, 826, 801  $\text{cm}^{-1}$ ;  $^1\text{H}$  NMR (400 MHz,  $\text{CDCl}_3$ )  $\delta$  1.62 (3H, d,  $J = 7.3$  Hz), 2.28 (3H, s), 4.12 (1H, q,  $J = 7.3$  Hz), 6.90 (1H, s), 6.96 (1H, d,  $J = 8.0$  Hz), 7.05 (1H, d,  $J = 8.0$  Hz), 7.12 (2H, d,  $J = 6.0$  Hz), 7.31, (1H, t,  $J = 8.0$  Hz), 8.49 (2H, d,  $J = 6.0$  Hz);  $^{13}\text{C}$  NMR (100 MHz,  $\text{CDCl}_3$ )  $\delta$  20.9, 21.1, 43.9, 119.8, 120.7, 122.9, 125.1, 129.5, 146.0, 149.8, 150.8, 154.5, 169.4; HRMS (ESI-TOF) calcd for  $\text{C}_{15}\text{H}_{15}\text{NO}_2\text{Na}$  ( $\text{M}+\text{Na}$ ) $^+$  264.0995, found 264.0999.

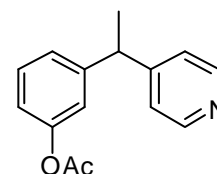

**2-(1-(pyridin-4-yl)ethyl)phenyl acetate (3o):**

68% yield (21.9 mg); colorless oil; IR (neat) 1764, 1597, 1488, 1451, 1414, 1201, 829, 755  $\text{cm}^{-1}$ ;  $^1\text{H}$  NMR (400 MHz,  $\text{CDCl}_3$ )  $\delta$  1.59 (3H, d,  $J = 7.3$  Hz), 2.16 (3H, s), 4.23 (1H, q,  $J = 7.3$  Hz), 7.04 (1H, dd,  $J = 1.4, 7.8$  Hz), 7.09 (2H, dd,  $J = 1.8, 4.6$  Hz), 7.20-7.30 (3H, m), 8.47 (2H, dd,  $J = 1.8, 4.6$  Hz);  $^{13}\text{C}$  NMR (100 MHz,  $\text{CDCl}_3$ )  $\delta$  20.2, 20.8, 38.1, 122.7, 122.8, 126.3, 127.8, 128.3, 135.9, 148.4, 149.6, 154.4, 169.0; HRMS (ESI-TOF) calcd for  $\text{C}_{15}\text{H}_{16}\text{NO}_2$  ( $\text{M}+\text{H}$ ) $^+$  242.1176, found 242.1175.

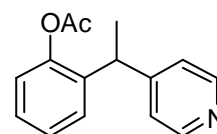

**methyl 2-(4-(2-methyl-1-(pyridin-4-yl)propyl)phenyl)propanoate (3p):**

75% yield based on the NMR analysis using  $\text{CH}_2\text{Br}_2$  as an internal standard, 9.2 mg (20%) was isolated; colorless oil; IR (neat) 1736, 1595, 1459, 1415, 1210, 1166, 809  $\text{cm}^{-1}$ ;  $^1\text{H}$  NMR (400 MHz,  $\text{CDCl}_3$ )  $\delta$  0.85 (3H, d,  $J = 6.4$  Hz), 0.87 (3H, d,  $J = 6.4$  Hz), 1.45 (3H, d,  $J = 7.3$  Hz), 2.46 (1H, m), 3.37 (1H, d,  $J = 10.5$  Hz), 3.64 (3H, s), 3.67 (1H, q,  $J = 7.3$  Hz), 7.20 (6H, m), 8.46 (2H, dd,  $J = 1.4, 4.6$  Hz);  $^{13}\text{C}$  NMR (100 MHz,  $\text{CDCl}_3$ )  $\delta$  18.5, 21.5, 21.6, 31.4, 44.9, 52.0, 59.9, 123.5, 127.7, 128.2, 138.7, 141.7, 149.6, 153.8, 175.0; HRMS (ESI-TOF) calcd for  $\text{C}_{19}\text{H}_{23}\text{NO}_2\text{Na}$  ( $\text{M}+\text{Na}$ ) $^+$  320.1621, found 320.1607.

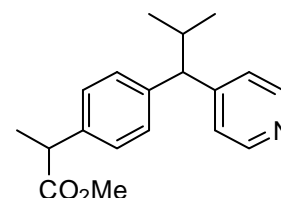

**4-(butoxy(phenyl)methyl)pyridine (3q):**

66% yield (28.6 mg); colorless oil; IR (neat) 1596, 1493, 1453, 1412, 1100, 790, 740, 700  $\text{cm}^{-1}$ ;  $^1\text{H}$  NMR (400 MHz,  $\text{CDCl}_3$ )  $\delta$  0.92 (3H, t,  $J = 7.3$  Hz), 1.42 (2H, m), 1.63 (2H, m), 3.45 (2H, m), 5.29 (1H, s), 7.25-7.35 (7H, m), 8.53 (2H, dd,  $J = 1.4, 4.6$  Hz);  $^{13}\text{C}$  NMR (100 MHz,  $\text{CDCl}_3$ )  $\delta$  13.9, 19.4, 31.9, 69.1, 82.3, 121.6, 127.1, 128.0, 128.6, 141.0, 149.7, 151.6; HRMS (ESI-TOF) calcd for  $\text{C}_{16}\text{H}_{20}\text{NO}$  ( $\text{M}+\text{H}$ ) $^+$  242.1539, found 242.1525.

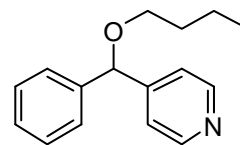

**4-benzhydrylpyridine (3r) [CAS: 3678-72-6]:<sup>2</sup>**

87% yield (38.5 mg); colorless solid;  $^1\text{H}$  NMR (400 MHz,  $\text{CDCl}_3$ )  $\delta$  5.51 (1H, s), 7.05 (2H, dd,  $J = 1.4, 4.6$  Hz), 7.09 (4H, m), 7.20-7.35 (6H, m), 8.51 (2H, dd,  $J = 1.4, 4.6$  Hz);  $^{13}\text{C}$  NMR (100 MHz,  $\text{CDCl}_3$ )  $\delta$  56.2, 124.7, 126.9, 128.6, 129.3, 142.0, 149.6, 152.9.

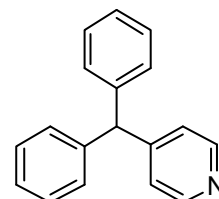

**4-(1,1-diphenylpropyl)pyridine (3s):**

74% yield (31.0 mg); colorless oil; IR (neat) 1592, 1493, 1445, 1410, 815, 757, 702  $\text{cm}^{-1}$ ;  $^1\text{H}$  NMR (400 MHz,  $\text{CDCl}_3$ )  $\delta$  0.78 (3H, t,  $J = 7.3$  Hz), 2.62 (2H, q,  $J = 7.3$  Hz), 7.20-7.35 (12H, m), 8.49 (2H, dd,  $J = 1.8, 5.0$  Hz);  $^{13}\text{C}$  NMR (100 MHz,  $\text{CDCl}_3$ )  $\delta$  10.1, 32.1, 56.8, 124.4, 126.3, 128.0, 129.1, 145.5, 149.3, 156.6; HRMS (ESI-TOF) calcd for  $\text{C}_{20}\text{H}_{20}\text{N}$  ( $\text{M}+\text{H}$ ) $^+$  274.1590, found 274.1576.

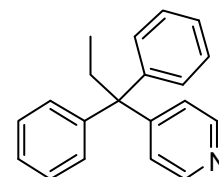

**4-(2,3-dihydro-1H-inden-1-yl)pyridine (3t):**

89% yield (23.0 mg); colorless oil; IR (neat) 1597, 1478, 1458, 1414, 819, 747  $\text{cm}^{-1}$ ;  $^1\text{H}$  NMR (400 MHz,  $\text{CDCl}_3$ )  $\delta$  2.04 (1H, ddt,  $J = 8.2, 8.7, 12.8$  Hz), 2.61 (1H, dddd,  $J = 4.6, 8.2, 8.7, 12.8$  Hz), 2.95-3.15 (2H, m), 4.32 (1H, t,  $J = 8.2$  Hz), 6.94 (1H, d,  $J = 7.3$  Hz), 7.11 (2H, dd,  $J = 1.6, 4.6$  Hz), 7.15 (1H, t,  $J = 7.3$  Hz), 7.22 (1H, t,  $J = 7.3$  Hz), 7.31 (1H, d,  $J = 7.3$  Hz), 8.51 (2H, dd,  $J = 1.6, 4.6$  Hz);  $^{13}\text{C}$  NMR (100 MHz,  $\text{CDCl}_3$ )  $\delta$  31.8, 35.8, 50.8, 123.3, 124.6, 124.7, 126.6, 127.1, 144.3, 144.9, 149.8, 154.3; HRMS (ESI-TOF) calcd for  $\text{C}_{14}\text{H}_{14}\text{N}$  ( $\text{M}+\text{H}$ ) $^+$  196.1121, found 196.1127.

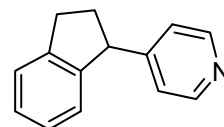

**4-(1,2,3,4-tetrahydronaphthalen-1-yl)pyridine (3u):**

70% yield (28.4 mg); colorless oil; IR (neat) 1596, 1492, 1450, 1412, 815, 743  $\text{cm}^{-1}$ ;  $^1\text{H}$  NMR (400 MHz,  $\text{CDCl}_3$ )  $\delta$  1.70-1.90 (3H, m), 2.17 (1H, m),

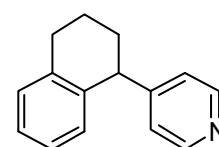

(2) Niwa, T.; Yorimitsu, H.; Oshima, K. *Org. Lett.* **2007**, *9*, 2373.

2.80-3.00 (2H, m), 4.12 (1H, dd,  $J = 6.0, 6.9$  Hz), 6.78 (1H, d,  $J = 7.8$  Hz), 7.02 (2H, dd,  $J = 1.8, 4.6$  Hz), 7.06 (1H, dd,  $J = 7.3, 7.8$  Hz), 7.16 (2H, d,  $J = 7.3$  Hz), 8.49 (2H, dd,  $J = 1.8, 4.6$  Hz);  $^{13}\text{C}$  NMR (100 MHz,  $\text{CDCl}_3$ )  $\delta$  20.5, 29.5, 32.5, 44.9, 124.1, 125.9, 126.4, 129.2, 130.0, 137.2, 137.6, 149.6, 156.3; HRMS (ESI-TOF) calcd for  $\text{C}_{15}\text{H}_{16}\text{N}$  ( $\text{M}+\text{H}$ ) $^+$  210.1277, found 210.1273.

**4-(1,3-dihydroisobenzofuran-1-yl)pyridine (3v):**

75% yield (30.3 mg); yellow oil; IR (neat) 1599, 1462, 1414, 1044, 802, 748  $\text{cm}^{-1}$ ;  $^1\text{H}$  NMR (400 MHz,  $\text{CDCl}_3$ )  $\delta$  5.25 (1H, dd,  $J = 1.8, 12.4$  Hz), 5.37 (1H, dd,  $J = 2.8, 12.4$  Hz), 6.14 (1H, brs), 7.07 (1H, d,  $J = 7.8$  Hz), 7.20-7.35 (5H, m), 8.58 (2H, dd,  $J = 1.4, 4.6$  Hz);  $^{13}\text{C}$  NMR (100 MHz,  $\text{CDCl}_3$ )  $\delta$  73.7, 84.6, 121.16, 121.24, 121.9, 127.7, 128.1, 138.7, 140.4, 150.0, 151.1; HRMS (ESI-TOF) calcd for  $\text{C}_{13}\text{H}_{12}\text{NO}$  ( $\text{M}+\text{H}$ ) $^+$  198.0913, found 198.0908.

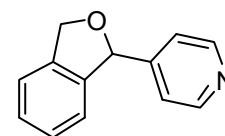

**tert-butyl 1-(pyridin-4-yl)isoindoline-2-carboxylate (3w):**

77% yield (32.0 mg), mixture of two rotamers; amorphous; IR (neat) 1699, 1598, 1475, 1391, 1170, 747  $\text{cm}^{-1}$ ;  $^1\text{H}$  NMR (400 MHz,  $\text{CDCl}_3$ )  $\delta$  1.24 (45/8H, s), 1.47 (27/8H, s), 4.86 (6/8H, s), 4.91 (10/8H, s), 5.83 (5/8H, s), 5.96 (3/8H, s), 6.97 (5/8H, d,  $J = 7.8$  Hz), 7.02 (3/8H, d,  $J = 7.8$  Hz), 7.15-7.25 (3H, m), 7.29 (2H, m), 8.54 (2H, d,  $J = 5.5$  Hz); Detectable signals of  $^{13}\text{C}$  NMR (100 MHz,  $\text{CDCl}_3$ )  $\delta$  28.1, 28.4, 52.7, 53.0, 66.2, 66.5, 80.4, 121.4, 121.5, 122.7, 123.0, 123.2, 123.3, 127.8, 128.2, 135.7, 140.0, 149.8, 152.9, 154.0; HRMS (ESI-TOF) calcd for  $\text{C}_{18}\text{H}_{21}\text{N}_2\text{O}_2$  ( $\text{M}+\text{H}$ ) $^+$  297.1598, found 297.1584.

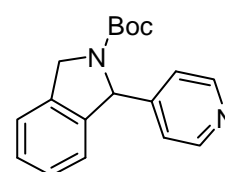

**tert-butyl 1-(pyridin-4-yl)-3,4-dihydroisoquinoline-2(1H)-carboxylate (3x):**

82% yield (40.3 mg), mixture of two rotamers; colorless oil; IR (neat) 1693, 1595, 1455, 1415, 1166, 750  $\text{cm}^{-1}$ ;  $^1\text{H}$  NMR (400 MHz,  $\text{CDCl}_3$ )  $\delta$  1.48 (9H, s), 2.75 (1H, brs), 2.93 (1H, brs), 3.27 (1H, ddd,  $J = 4.6, 9.6, 13.2$  Hz), 3.89 (1/2H, brs), 4.02 (1/2H, brs), 6.12 (1/2H, brs), 6.34 (1/2H, brs), 7.08 (1H, brs), 7.14 (2H, d,  $J = 6.0$  Hz), 7.15-7.30 (3H, m), 8.51 (2H, d,  $J = 6.0$  Hz); Detectable signals of  $^{13}\text{C}$  NMR (100 MHz,  $\text{CDCl}_3$ )  $\delta$  28.35, 28.42, 38.4, 39.4, 56.3, 57.4, 80.5, 122.8, 126.3, 127.5, 128.2, 128.9, 134.1, 135.3, 149.6, 151.8, 154.9; HRMS (ESI-TOF) calcd for  $\text{C}_{19}\text{H}_{23}\text{N}_2\text{O}_2$  ( $\text{M}+\text{H}$ ) $^+$  311.1754, found 311.1750.

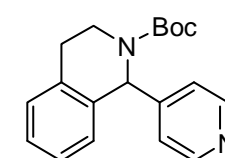

**4-(pyridin-4-yl)chroman-2-one (3y):**

84% yield (31.3 mg); yellow oil; IR (neat) 1770, 1597, 1486, 1455, 1416, 1216, 824, 759  $\text{cm}^{-1}$ ;  $^1\text{H}$  NMR (400 MHz,  $\text{CDCl}_3$ )  $\delta$  3.03 (1H, dd,  $J = 6.4, 16.0$  Hz), 3.11 (1H, dd,  $J = 6.4, 16.0$  Hz), 4.34 (1H, t,  $J = 6.4$  Hz), 7.00 (1H,

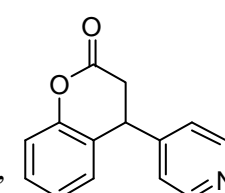

d,  $J = 6.8$  Hz), 7.05-7.20 (4H, m), 7.35 (1H, m), 8.57 (2H, dd,  $J = 1.4, 4.6$  Hz);  $^{13}\text{C}$  NMR (100 MHz,  $\text{CDCl}_3$ )  $\delta$  36.1, 40.1, 117.5, 122.6, 123.7, 124.9, 128.1, 129.5, 149.2, 150.5, 151.7, 166.6; HRMS (ESI-TOF) calcd for  $\text{C}_{14}\text{H}_{12}\text{NO}_2$  ( $\text{M}+\text{H}$ ) $^+$  226.0863, found 226.0857.

**4-(pyridin-4-yl)-3,4-dihydroquinolin-2(1H)-one (3z):**

84% yield (29.2 mg); colorless solid; m.p. 210-213 °C; IR (neat) 3208, 1681, 1595, 1488, 1417, 825, 756  $\text{cm}^{-1}$ ;  $^1\text{H}$  NMR (400 MHz,  $\text{CDCl}_3$ )  $\delta$  2.90 (1H, dd,  $J = 7.3, 16.5$  Hz), 3.00 (1H, dd,  $J = 6.4, 16.5$  Hz), 4.29 (1H, dd,  $J = 6.4, 7.3$  Hz), 6.90-7.05 (3H, m), 7.13 (2H, d,  $J = 6.0$  Hz), 7.25 (1H, t,  $J = 7.8$  Hz), 8.57 (2H, d,  $J = 6.0$  Hz), 9.11 (1H, brs);  $^{13}\text{C}$  NMR (100 MHz,  $\text{CDCl}_3$ )  $\delta$  37.5, 41.3, 116.1, 122.9, 123.6, 124.4, 128.3, 128.7, 137.1, 150.1, 150.7, 170.0; HRMS (ESI-TOF) calcd for  $\text{C}_{14}\text{H}_{13}\text{N}_2\text{O}$  ( $\text{M}+\text{H}$ ) $^+$  225.1022, found 225.1041.

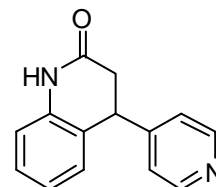

**Pyridinyl O-acetoxypodocarpic acid methyl ester (3aa):**

71% (45.3 mg); **3aa- $\alpha$**  / **3aa- $\beta$**  = 2:1; amorphous.

$^1\text{H}$  NMR (400 MHz,  $\text{CDCl}_3$ )  $\delta$  0.81 (2H, s), 0.86 (2/3H, dt,  $J = 4.6, 13.7$  Hz), 1.05 (2H, s), 1.10 (1/3H, dt,  $J = 4.1, 13.7$  Hz), 1.16 (1H, s), 1.20-1.50 (10/3H, m), 1.62 (2/3H, m), 1.73 (2/3H, dd,  $J = 1.4, 12.4$  Hz), 1.85-2.25 (10/3H, m), 2.27 (1H, s), 2.30 (2H, s), 2.38 (1/3H, dd,  $J = 6.0, 14.2$  Hz), 2.52 (2/3H, ddd,  $J = 6.0, 12.8, 12.8$  Hz), 3.63 (1H, s), 3.65 (2H, s), 3.99 (1/3H, dd,  $J = 6.0, 12.4$  Hz), 4.31 (2/3H, d,  $J = 6.0$  Hz), 6.66 (1/3H, d,  $J = 8.7$  Hz), 6.74 (1/3H, dd,  $J = 2.3, 8.7$  Hz), 6.80-7.00 (8/3H, m), 7.03 (1/3H, d,  $J = 2.3$  Hz), 7.07 (2/3H, d,  $J = 1.8$  Hz), 7.11 (2/3H, dd,  $J = 1.4, 4.6$  Hz), 8.48 (4/3H, d,  $J = 6.0$  Hz), 8.53 (2/3H, d,  $J = 6.0$  Hz); Detectable signals of  $^{13}\text{C}$  NMR (100 MHz,  $\text{CDCl}_3$ )  $\delta$  19.7, 19.8, 21.1, 21.2, 22.6, 23.4, 27.9, 28.4, 28.8, 31.5, 37.0, 37.4, 38.8, 38.9, 39.3, 43.1, 43.9, 44.5, 45.9, 48.3, 51.39, 51.44, 51.7, 118.3, 118.8, 119.1, 119.5, 124.07, 124.13, 130.6, 131.6, 131.7, 134.0, 149.4, 149.5, 149.7, 149.9, 150.3, 150.6, 156.2, 156.3, 169.5, 169.6, 177.3, 177.5; HRMS (ESI-TOF) calcd for  $\text{C}_{25}\text{H}_{30}\text{NO}_4$  ( $\text{M}+\text{H}$ ) $^+$  408.2169, found 408.2159.

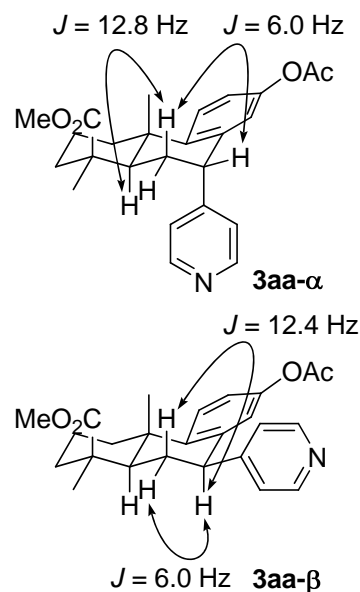

**Preparation of O-pivaloyl totarol (1bb):**

To a solution of (+)-totarol (94.0 mg, 328  $\mu\text{mol}$ ) in pyridine (1.6 mL, 0.2 M) were added pivaloyl chloride (480  $\mu\text{L}$ , 3.90 mmol) and DMAP (2.0 mg, 16.4  $\mu\text{mol}$ ) at room temperature. The mixture was refluxed on 110 °C for three days, then the reaction was quenched with water. The mixture was extracted with  $\text{Et}_2\text{O}$  (20 mL x 3), washed with brine,

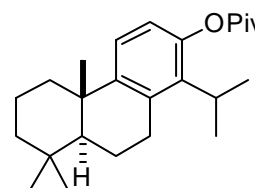



dried over  $\text{Na}_2\text{SO}_4$ , and concentrated. The residue was purified with flash column chromatography (hexane/AcOEt 40:1) to afford *O*-pivaloyl totarol **1aa** in 100% yield (122 mg): white solid; m.p. 113-115 °C; IR (neat) 1750, 1473, 1123, 733  $\text{cm}^{-1}$ ;  $^1\text{H}$  NMR (400 MHz,  $\text{CDCl}_3$ )  $\delta$  0.93 (3H, s), 0.96 (3H, s), 1.21 (3H, s), 1.23-1.31 (9H, m), 1.39 (9H, s), 1.48 (1H, d,  $J = 13.8$  Hz), 1.55-1.80 (3H, m), 1.93 (1H, dd,  $J = 7.8, 13.3$  Hz), 2.25 (1H, d,  $J = 12.8$  Hz), 2.78 (1H, m), 2.95 (1H, dd,  $J = 6.4, 17.4$  Hz), 3.29 (1H, quintet,  $J = 7.3$  Hz), 6.68 (1H, d,  $J = 8.7$  Hz), 7.14 (1H, d,  $J = 8.7$  Hz);  $^{13}\text{C}$  NMR (100 MHz,  $\text{CDCl}_3$ )  $\delta$  19.2, 19.4, 20.69, 20.73, 21.6, 25.0, 27.0, 27.3, 28.8, 33.2, 33.3, 38.0, 39.1, 39.3, 41.4, 49.3, 120.5, 123.2, 134.0, 136.4, 147.6, 147.7, 177.5; HRMS (ESI-TOF) calcd for  $\text{C}_{25}\text{H}_{38}\text{O}_2\text{Na}$  ( $\text{M}+\text{Na}$ ) $^+$  393.2764, found 393.2772.

### Pyridinyl *O*-pivaloyl totarol (**3bb**):

72% (52.8 mg); **3bb- $\alpha$**  / **3bb- $\beta$**  = 2:3; colorless oil.

**3bb- $\alpha$** : IR (neat) 1748, 1595, 1471, 1122, 732  $\text{cm}^{-1}$ ;  $^1\text{H}$  NMR (400 MHz,  $\text{CDCl}_3$ )  $\delta$  0.39 (3H, s), 0.69 (3H, d,  $J = 6.8$  Hz), 0.84 (3H, s), 1.06 (1H, m), 1.14 (3H, d,  $J = 6.8$  Hz), 1.23-1.40 (15H, m), 1.50-1.85 (3H, m), 2.19 (1H, ddd,  $J = 6.0, 13.3, 13.3$  Hz), 2.30 (1H, d,  $J = 13.3$  Hz), 2.78 (1H, quintet,  $J = 6.8$  Hz), 4.41 (1H, d,  $J = 6.0$  Hz), 6.81 (1H, d,  $J = 9.1$  Hz), 6.91 (2H, brs), 7.26 (1H, d,  $J = 9.1$  Hz), 8.0 Hz, 46 (2H, d,  $J = 4.1$  Hz);  $^{13}\text{C}$  NMR (100 MHz,  $\text{CDCl}_3$ )  $\delta$  19.4, 19.7, 20.9, 21.6, 25.5, 27.3, 27.9, 28.1, 32.3, 32.5, 38.9, 39.1, 39.3, 40.9, 43.2, 43.6, 122.6, 123.8, 124.2, 133.3, 137.1, 148.2, 148.8, 149.3, 156.7, 177.4; HRMS (ESI-TOF) calcd for  $\text{C}_{30}\text{H}_{42}\text{NO}_2$  ( $\text{M}+\text{H}$ ) $^+$  448.3210, found 448.3197.

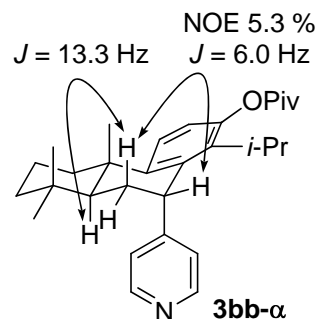

**3bb- $\beta$** : IR (neat) 1747, 1595, 1472, 1122, 732  $\text{cm}^{-1}$ ;  $^1\text{H}$  NMR (400 MHz,  $\text{CDCl}_3$ )  $\delta$  0.55 (3H, d,  $J = 6.9$  Hz), 0.83 (3H, s), 0.96 (3H, s), 1.08 (3H, d,  $J = 6.9$  Hz), 1.15-1.90 (19H, m), 2.25-2.35 (2H, m), 2.86 (1H, quintet,  $J = 6.9$  Hz), 4.37 (1H, dd,  $J = 9.6, 9.6$  Hz), 6.78 (1H, d,  $J = 8.7$  Hz), 6.94 (2H, brs), 7.24 (1H, d,  $J = 8.7$  Hz), 8.47 (2H, d,  $J = 5.0$  Hz);  $^{13}\text{C}$  NMR (100 MHz,  $\text{CDCl}_3$ )  $\delta$  19.1, 19.2, 21.1, 21.3, 24.7, 27.3, 28.5, 31.5, 32.9, 33.3, 38.1, 39.1, 39.7, 41.4, 44.6, 48.8, 122.2, 122.5, 123.1, 134.4, 137.4, 148.9, 149.6, 149.8, 158.9, 177.4; HRMS (ESI-TOF) calcd for  $\text{C}_{30}\text{H}_{42}\text{NO}_2$  ( $\text{M}+\text{H}$ ) $^+$  448.3210, found 448.3190.

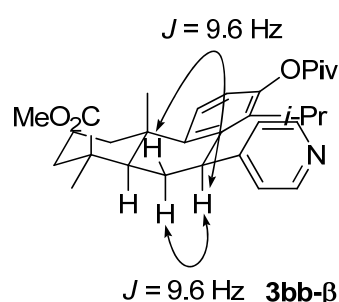

### 4-(1-(thiophen-2-yl)butyl)pyridine (**3cc**):

67% yield (22.9 mg); yellow oil; IR (neat) 1597, 1414, 822, 697  $\text{cm}^{-1}$ ;  $^1\text{H}$  NMR (500 MHz,  $\text{CDCl}_3$ )  $\delta$  0.93 (3H, t,  $J = 7.5$  Hz), 1.20-1.40 (2H, m), 1.90-2.10 (2H, m), 4.12 (1H, t,  $J = 7.5$  Hz), 6.83 (1H, d,  $J = 3.4$  Hz), 6.93 (1H, dd,  $J = 3.4, 5.2$  Hz), 7.10-7.20 (3H, m), 8.51 (2H, d,  $J = 6.3$  Hz);  $^{13}\text{C}$

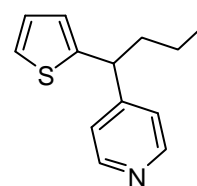

NMR (125 MHz, CDCl<sub>3</sub>)  $\delta$  13.8, 20.9, 38.9, 45.9, 123.0, 123.9, 124.3, 126.7, 147.2, 149.8, 153.6; HRMS (ESI-TOF) calcd for C<sub>13</sub>H<sub>16</sub>NS (M+H)<sup>+</sup> 218.0998, found 218.1000.

**4-(1-(thiophen-3-yl)butyl)pyridine (3dd):**

47% yield (19.3 mg); yellow oil; IR (neat) 1598, 1415, 824, 775 cm<sup>-1</sup>; <sup>1</sup>H NMR (400 MHz, CDCl<sub>3</sub>)  $\delta$  0.92 (3H, t, *J* = 7.8 Hz), 1.20-1.40 (2H, m), 1.90-2.10 (2H, m), 3.96 (1H, t, *J* = 7.8 Hz), 6.87 (1H, dd, *J* = 1.4, 5.0 Hz), 7.01 (1H, dd, *J* = 1.4, 2.7 Hz), 7.13 (2H, dd, *J* = 1.8, 4.6 Hz), 7.25 (1H, dd, *J* = 2.7, 5.0 Hz), 8.49 (2H, dd, *J* = 1.8, 4.6 Hz); <sup>13</sup>C NMR (125 MHz, CDCl<sub>3</sub>)  $\delta$  13.9, 20.8, 37.6, 46.1, 120.6, 123.2, 125.8, 127.3, 144.1, 149.7, 153.9; HRMS (ESI-TOF) calcd for C<sub>13</sub>H<sub>16</sub>NS (M+H)<sup>+</sup> 218.0998, found 218.0991.

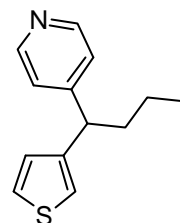

**4-(1-(furan-2-yl)pentyl)pyridine (3ee):**

51% yield (14.2 mg); colorless oil; IR (neat) 1597, 1560, 1503, 1460, 1415, 1010, 801, 732 cm<sup>-1</sup>; <sup>1</sup>H NMR (400 MHz, CDCl<sub>3</sub>)  $\delta$  0.87 (3H, t, *J* = 7.3 Hz), 1.10-1.40 (4H, m), 1.87 (1H, m), 2.08 (1H, m), 3.89 (1H, t, *J* = 7.8 Hz), 6.10 (1H, d, *J* = 3.2 Hz), 6.30 (1H, dd, *J* = 1.8, 3.2 Hz), 7.15 (2H, dd, *J* = 1.4, 4.6 Hz), 7.32 (1H, d, *J* = 1.8 Hz), 8.51 (2H, dd, *J* = 1.4, 4.6 Hz); <sup>13</sup>C NMR (125 MHz, CDCl<sub>3</sub>)  $\delta$  13.9, 22.4, 29.6, 33.8, 44.7, 105.9, 110.1, 123.2, 141.7, 149.8, 151.9, 156.1; HRMS (ESI-TOF) calcd for C<sub>14</sub>H<sub>18</sub>NO (M+H)<sup>+</sup> 216.1383, found 216.1392.

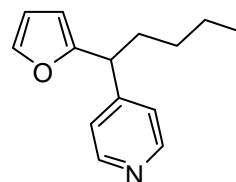

**4-(cyclohex-2-enyl)pyridine (3ff) [CAS: 78905-51-8]:<sup>3</sup>**

44% yield (9.8 mg); colorless oil; <sup>1</sup>H NMR (400 MHz, CDCl<sub>3</sub>)  $\delta$  1.50-1.80 (3H, m), 1.95-2.15 (3H, m), 3.39 (1H, m), 5.66 (1H, dd, *J* = 1.8, 10.0 Hz), 5.95 (1H, ddd, *J* = 2.3, 3.6, 10.0 Hz), 7.15 (2H, d, *J* = 6.0 Hz), 8.50 (2H, d, *J* = 6.0 Hz); <sup>13</sup>C NMR (125 MHz, CDCl<sub>3</sub>)  $\delta$  20.8, 24.8, 31.7, 41.1, 123.2, 128.1, 129.7, 149.6, 155.4.

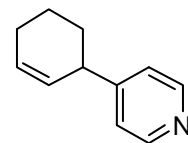

**4-cyclooctylpyridine (3gg):**

35% yield (11.1 mg); yellow oil; IR (neat) 1596, 1445, 1412, 832 cm<sup>-1</sup>; <sup>1</sup>H NMR (400 MHz, CDCl<sub>3</sub>)  $\delta$  1.50-1.90 (14H, m), 2.74 (1H, m), 7.10 (2H, dd, *J* = 1.8, 4.6 Hz), 8.46 (2H, dd, *J* = 1.8, 4.6 Hz); <sup>13</sup>C NMR (100 MHz, CDCl<sub>3</sub>)  $\delta$  25.7, 26.2, 26.8, 33.6, 44.0, 122.5, 149.6, 158.8; HRMS (ESI-TOF) calcd for C<sub>13</sub>H<sub>20</sub>N (M+H)<sup>+</sup> 190.1590, found 190.1598.

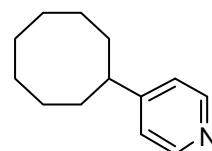

(3) Bernardi, R.; Caronna, T.; Morrocchi, S.; Traldi, P.; Vittimberga, B. M. *J. Chem. Soc., Perkin Trans. I* **1981**, 1607.

**4-methyl-4-(pyridin-4-yl)pentyl acetate (3hh):**

43% yield (14.5 mg); colorless oil; IR (neat) 1738, 1597, 1411, 1240, 823  $\text{cm}^{-1}$ ;  $^1\text{H}$  NMR (400 MHz,  $\text{CDCl}_3$ )  $\delta$  1.31 (6H, s), 1.37 (2H, m), 1.65 (2H, m), 2.01 (3H, s), 3.96 (2H, t,  $J = 6.9$  Hz), 7.23

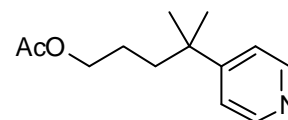

(2H, dd,  $J = 1.8, 4.6$  Hz), 8.52 (2H, dd,  $J = 1.8, 4.6$  Hz);  $^{13}\text{C}$  NMR (100 MHz,  $\text{CDCl}_3$ )  $\delta$  20.9, 24.0, 28.0, 37.5, 39.7, 64.6, 121.3, 149.4, 158.4, 171.1; HRMS (ESI-TOF) calcd for  $\text{C}_{13}\text{H}_{20}\text{NO}_2$  ( $\text{M}+\text{H}$ ) $^+$  222.1489, found 222.1491.

TH-12-121-f21-31-2nd-H

C:\Documents and Settings\PC-USER\My Documents\Data\Hoshikawa\12\TH-12-121-f21-31-2nd-H-1.als

3a

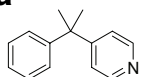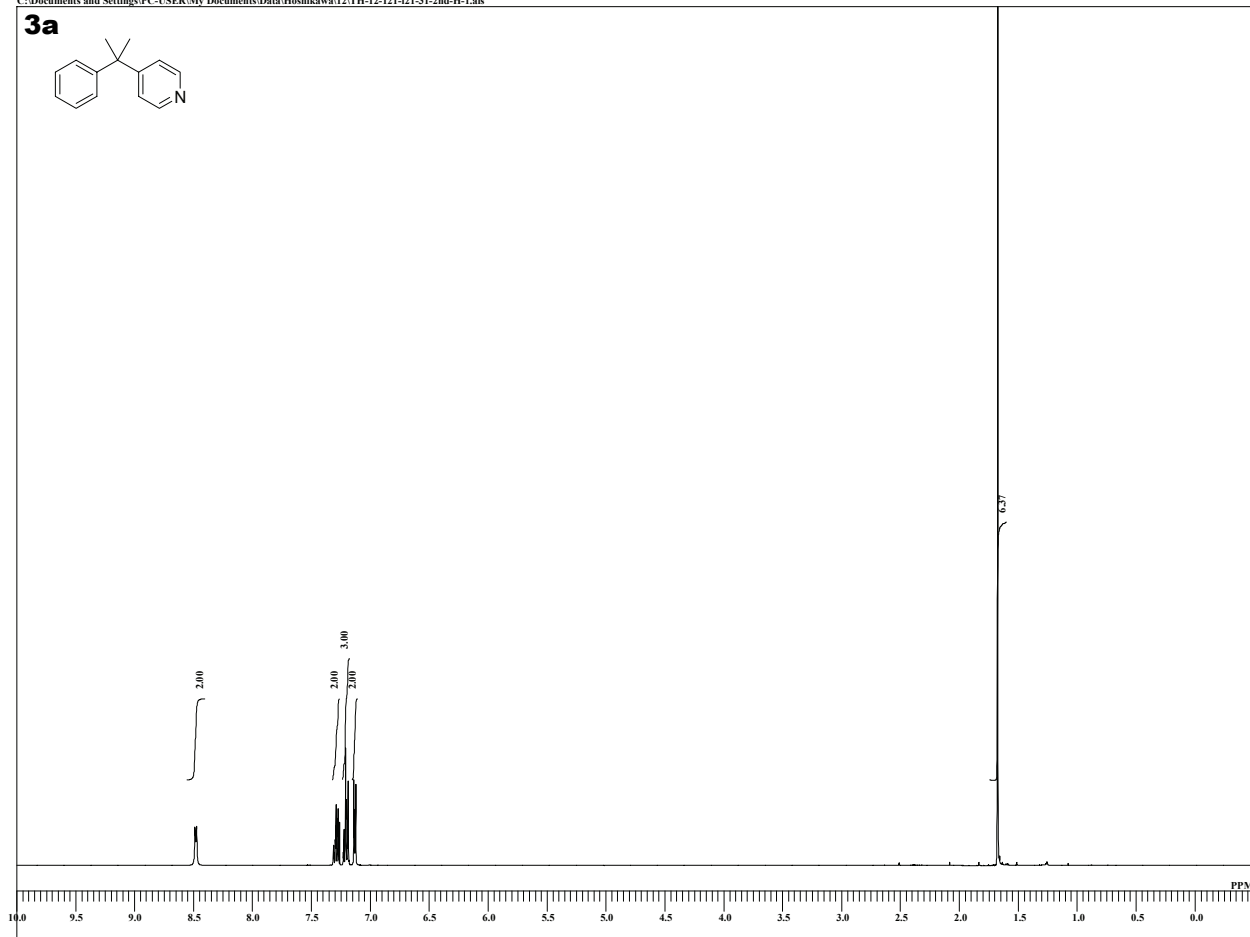

```

DFILE TH-12-121-f21-31-2nd-H-1.als
COMNT TH-12-121-f21-31-2nd-H
DATIM 21-07-2012 15:11:17
MENUF
OBNUC 1H
OFR 395.88 MHz
OBFRO 395.88 MHz
OBSET 6.28 KHz
OBFIN 0.87 Hz
PWI 6.38 usec
DEADT 0.00 usec
PREDL 0.00000 msec
IWT 1.0000 sec
POINT 13107
SPO 13107
TIMES 8
DUMMY 1
FREQU 5938.15 Hz
FLT 30000 Hz
DELAY 16.68 usec
ACQTM 2.2073 sec
PD 5.0000 sec
SCANS 8
ADBT 16
RGAIN 30
BF 0.01 Hz
T1 0.00
T2 0.00
T3 90.00
T4 100.00
EXMOD single_pulse.ex2
IRNUC 1H
IFR 395.88 MHz
IRSET 6.28 kHz
IRFIN 0.87 Hz
IRRPW 115 usec
IRATN 79
DFILE TH-12-121-f21-31-2nd-H-1.als
SF
LKSET 13.20 KHz
LKFIN 75.7 Hz
LKLEV 0
LGAIN 0
LKPHS 0
LKSG 0
CSPED 0 Hz
FILDC
FILDF
CTEMP 23.3 c
SLVNT CDCl3
EXREF 7.26 ppm
    
```

TH-12-121-f21-31-2ndC

C:\Documents and Settings\PC-USER\My Documents\Data\Hoshikawa\12\TH-12-121-f21-31-2ndC-1.als

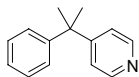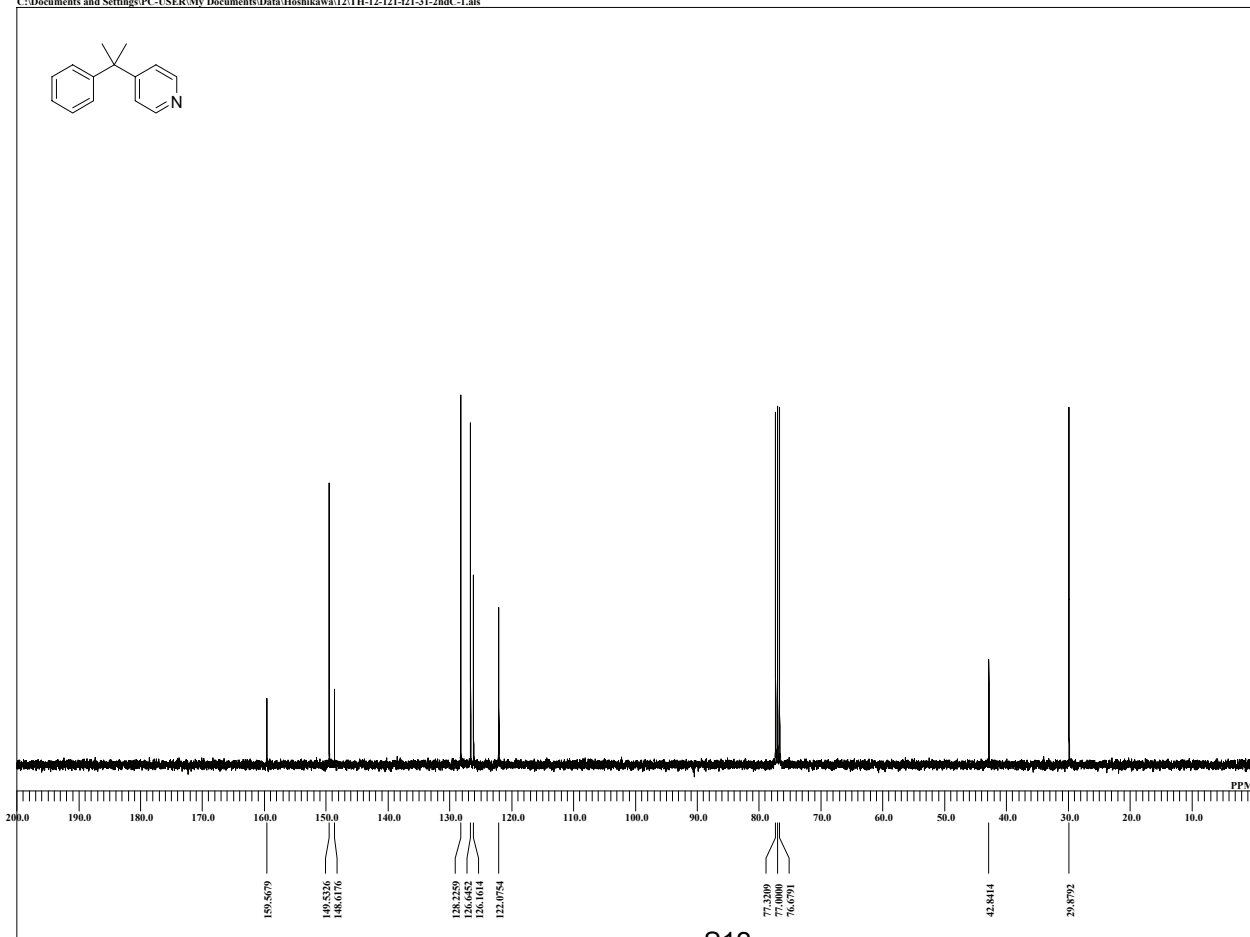

```

DFILE TH-12-121-f21-31-2ndC-1.als
COMNT TH-12-121-f21-31-2ndC
DATIM 21-07-2012 15:18:05
MENUF
OBNUC 13C
OFR 99.55 MHz
OBFRO 99.55 MHz
OBSET 5.13 KHz
OBFIN 0.98 Hz
PWI 3.25 usec
DEADT 0.00 usec
PREDL 0.00000 msec
IWT 1.0000 sec
POINT 52428
SPO 52428
TIMES 52
DUMMY 4
FREQU 24999.62 Hz
FLT 125000 Hz
DELAY 20.50 usec
ACQTM 1.0486 sec
PD 5.0000 sec
SCANS 52
ADBT 16
RGAIN 60
BF 1.00 Hz
T1 0.00
T2 0.00
T3 90.00
T4 100.00
EXMOD single_pulse_dec
IRNUC 1H
IFR 395.88 MHz
IRSET 6.28 kHz
IRFIN 0.87 Hz
IRRPW 115 usec
IRATN 79
DFILE TH-12-121-f21-31-2ndC-1.als
SF
LKSET 13.20 KHz
LKFIN 75.7 Hz
LKLEV 0
LGAIN 0
LKPHS 0
LKSG 0
CSPED 0 Hz
FILDC
FILDF
CTEMP 23.6 c
SLVNT CDCl3
EXREF 77.00 ppm
    
```

TH-12-109-f23-28

C:\Documents and Settings\PC-USER\My Documents\Data\Hoshikawa\12\TH-12-109-f23-28-1.a1s

3b

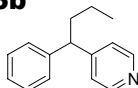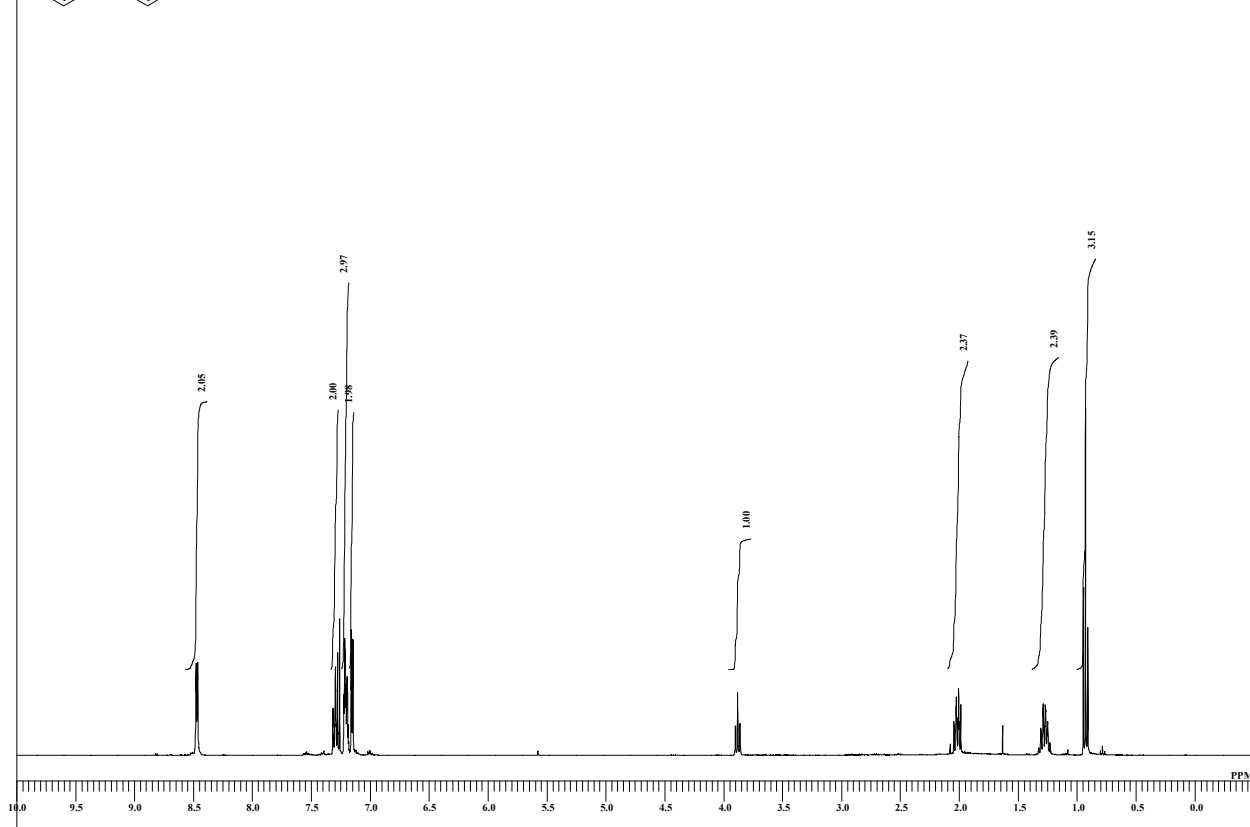

```

DFILE TH-12-109-f23-28-1.a1s
COMNT TH-12-109-f23-28
DATIM 13-07-2012 16:54:14
MENUF
OBNUC
OBR 395.88 MHz
OBRFQ 395.88 MHz
OBSET 6.28 KHz
OBFIN 0.87 Hz
PWI 6.38 usec
DEADT 0.00 usec
PREDL 0.00000 msec
IWT 1.0000 sec
POINT 13107
SPO 13107
TIMES 8
DUMMY 1
FREQU 5938.15 Hz
FLT 30000 Hz
DELAY 16.68 usec
ACQTM 2.2073 sec
PD 5.0000 sec
SCANS 8
ADBT 16
RGAIN 38
BF 0.01 Hz
T1 0.00
T2 0.00
T3 90.00
T4 100.00
EXMOD single_pulse.ex2
IRNUC 1H
IFR 395.88 MHz
IRSET 6.28 kHz
IRFIN 0.87 Hz
IRRPW 115 usec
IRATN 79
DFILE TH-12-109-f23-28-1.a1s
SF
LKSET 13.20 KHz
LKFIN 75.7 Hz
LKLEV 0
LGAIN 0
LKPHS 0
LKSG 0
CSPED 0 Hz
FILDC
FILDF
CTEMP 24.9 c
SLVNT CDCl3
EXREF 7.26 ppm
    
```

TH-12-109-f23-28C

C:\Documents and Settings\PC-USER\My Documents\Data\Hoshikawa\12\TH-12-109-f23-28C-1.a1s

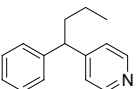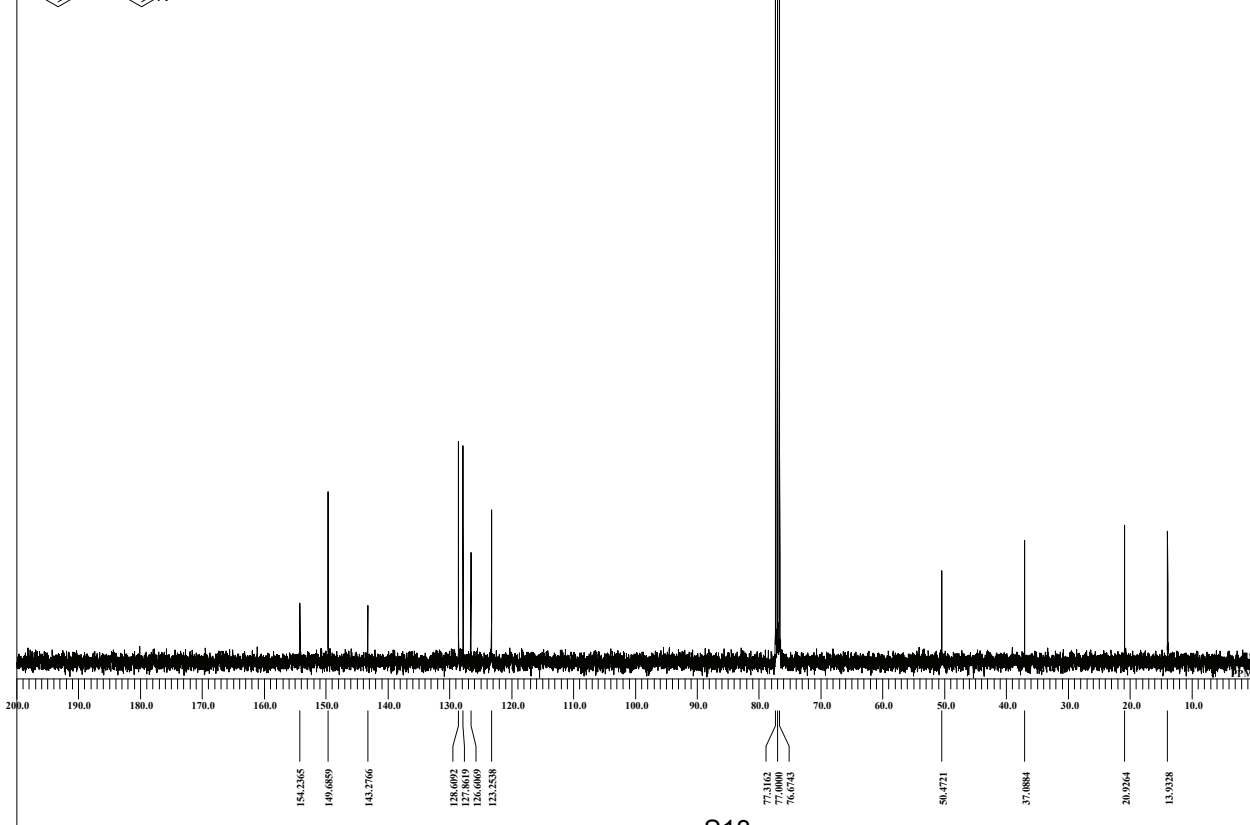

```

DFILE TH-12-109-f23-28C-1.a1s
COMNT TH-12-109-f23-28C
DATIM 13-07-2012 17:00:28
MENUF
OBNUC
OBR 99.55 MHz
OBRFQ 99.55 MHz
OBSET 5.13 KHz
OBFIN 0.98 Hz
PWI 3.25 usec
DEADT 0.00 usec
PREDL 0.00000 msec
IWT 1.0000 sec
POINT 26214
SPO 26214
TIMES 52
DUMMY 4
FREQU 24999.62 Hz
FLT 125000 Hz
DELAY 20.50 usec
ACQTM 1.0486 sec
PD 5.0000 sec
SCANS 52
ADBT 16
RGAIN 60
BF 1.00 Hz
T1 0.00
T2 0.00
T3 90.00
T4 100.00
EXMOD single_pulse_dec
IRNUC 13C
IFR 99.55 MHz
IRSET 5.13 kHz
IRFIN 0.98 Hz
IRRPW 115 usec
IRATN 79
DFILE TH-12-109-f23-28C-1.a1s
SF
LKSET 13.20 KHz
LKFIN 75.7 Hz
LKLEV 0
LGAIN 0
LKPHS 0
LKSG 0
CSPED 0 Hz
FILDC
FILDF
CTEMP 25.1 c
SLVNT CDCl3
EXREF 77.00 ppm
    
```

TH-13-37-f29-39

C:\Documents and Settings\PC-USER\My Documents\Data\Hoshikawa\13\TH-13-37-f29-39-1.Lab

3c

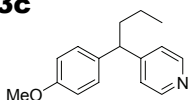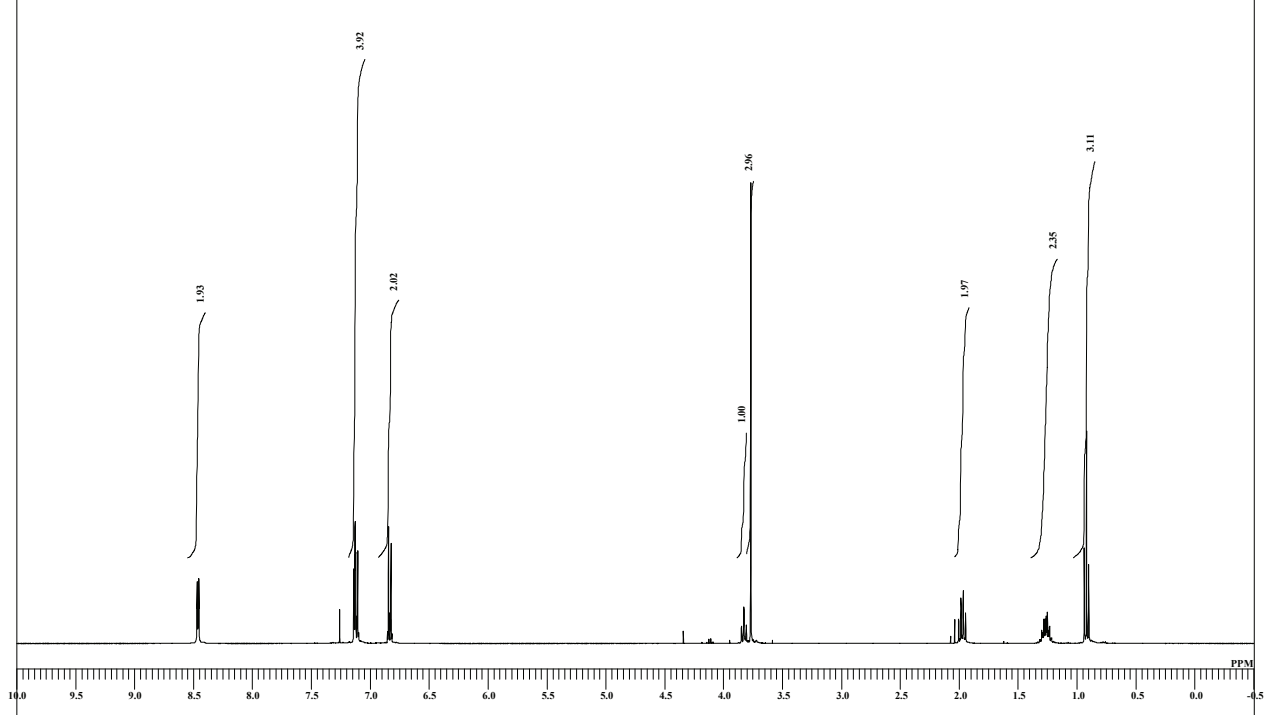

```

DFILE TH-13-37-f29-39-1.Lab
COMNT TH-13-37-f29-39
DATIM 05-09-2012 16:29:20
MENUF
OBNUC 1H
OFR 395.88 MHz
OBFRO 395.88 MHz
OBSET 6.28 KHz
OBFIN 0.87 Hz
PWI 6.38 usec
DEADT 0.00 usec
PREDL 0.00000 msec
IWT 1.0000 sec
POINT 16384
SPO 16384
TIMES 8
DUMMY 1
FREQU 7422.80 Hz
FLT 30000 Hz
DELAY 16.68 usec
ACQTM 2.2073 sec
PD 5.0000 sec
SCANS 8
ADBT 16
RGAIN 30
BF 0.01 Hz
T1 0.00
T2 0.00
T3 90.00
T4 100.00
EXMOD single_pulse.ex2
IRNUC 1H
IFR 395.88 MHz
IRSET 6.28 kHz
IRFIN 0.87 Hz
IRRPW 115 usec
IRATN 79
DFILE TH-13-37-f29-39-1.Lab
SF
LKSET 13.20 KHz
LKFIN 75.7 Hz
LKLEV 0
LGAIN 0
LKPHS 0
LKSG 0
CSPED 0 Hz
FILDC
FILDF
CTEMP 23.8 c
SLVNT CDCl3
EXREF 7.26 ppm
    
```

TH-13-37-f29-39C

C:\Documents and Settings\PC-USER\My Documents\Data\Hoshikawa\13\TH-13-37-f29-39C-1.Lab

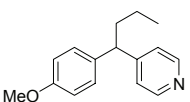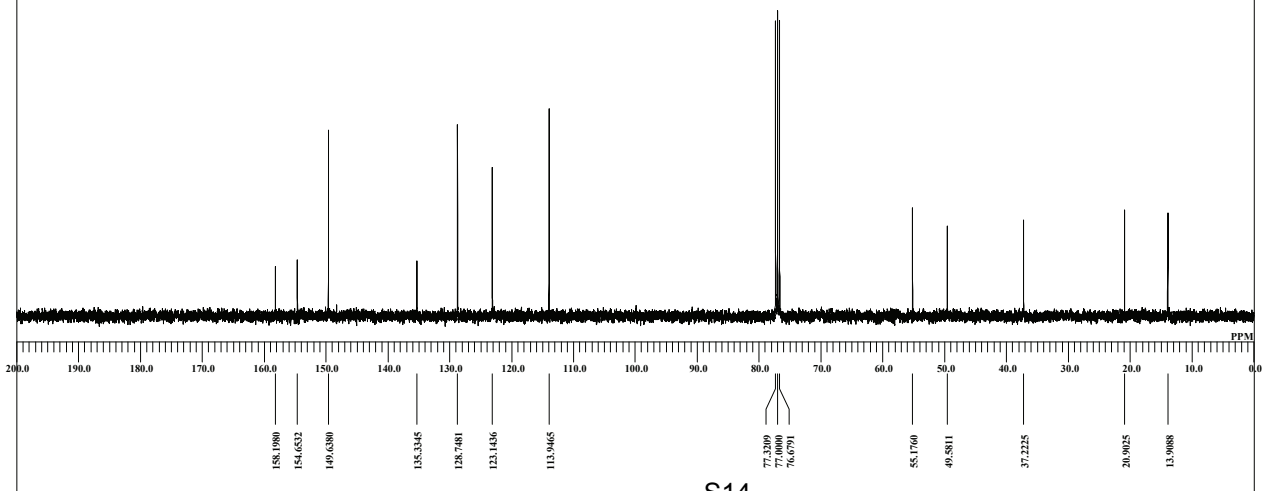

```

DFILE TH-13-37-f29-39C-1.Lab
COMNT TH-13-37-f29-39C
DATIM 05-09-2012 16:33:12
MENUF
OBNUC 13C
OFR 99.55 MHz
OBFRO 99.55 MHz
OBSET 5.13 KHz
OBFIN 0.98 Hz
PWI 3.25 usec
DEADT 0.00 usec
PREDL 0.00000 msec
IWT 1.0000 sec
POINT 65536
SPO 65536
TIMES 15
DUMMY 4
FREQU 31250.00 Hz
FLT 125000 Hz
DELAY 20.50 usec
ACQTM 1.0486 sec
PD 8.0000 sec
SCANS 15
ADBT 16
RGAIN 60
BF 1.00 Hz
T1 0.00
T2 0.00
T3 90.00
T4 100.00
EXMOD single_pulse_dec
IRNUC 1H
IFR 395.88 MHz
IRSET 6.28 kHz
IRFIN 0.87 Hz
IRRPW 115 usec
IRATN 79
DFILE TH-13-37-f29-39C-1.Lab
SF
LKSET 13.20 KHz
LKFIN 75.7 Hz
LKLEV 0
LGAIN 0
LKPHS 0
LKSG 0
CSPED 0 Hz
FILDC
FILDF
CTEMP 24.0 c
SLVNT CDCl3
EXREF 77.00 ppm
    
```

TH-13-39-2nd-f10-19

C:\Documents and Settings\PC-USER\My Documents\Data\Hoshikawa\13\TH-13-39-2nd-f10-19-1.jdf

3d

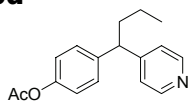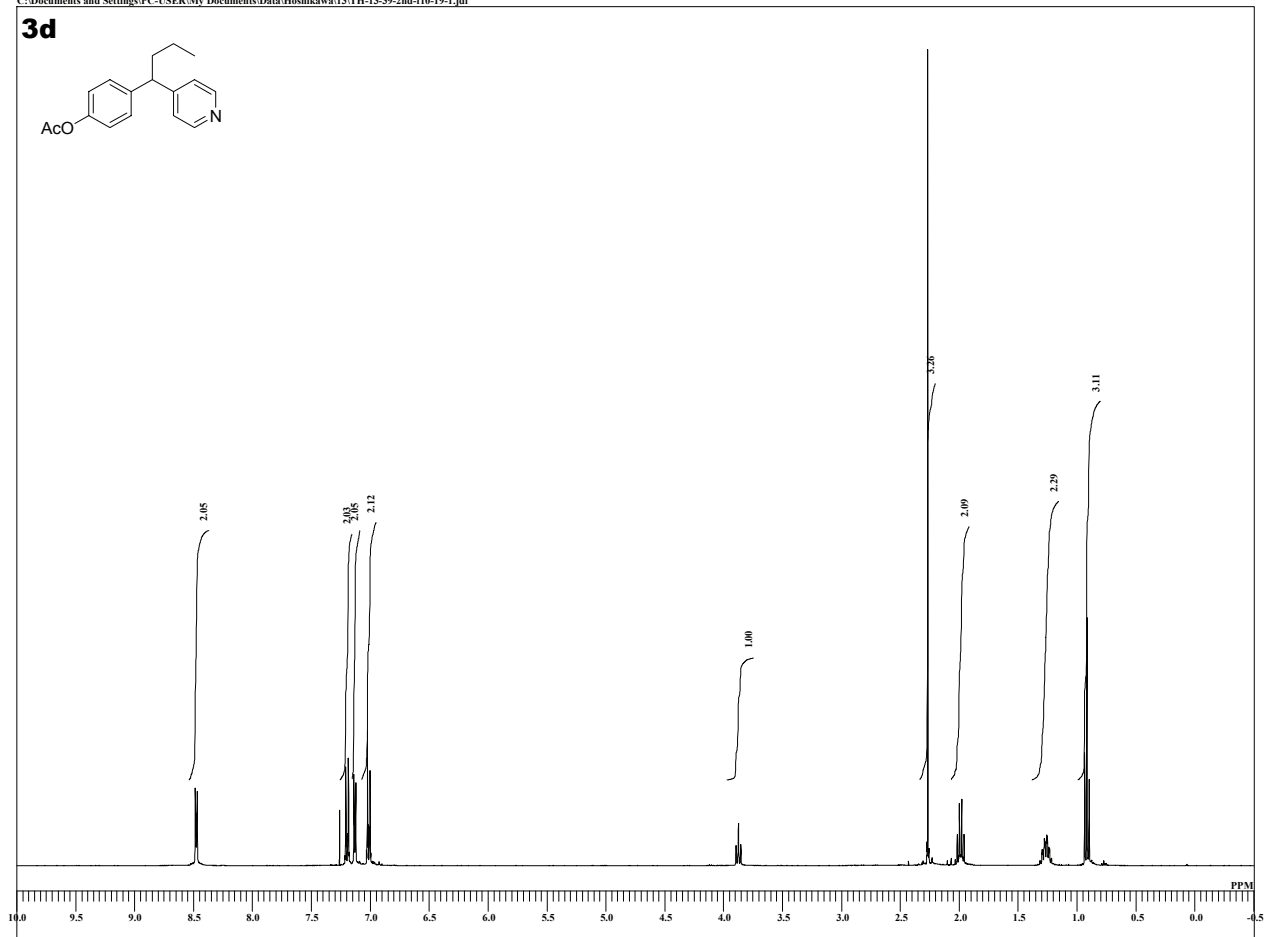

```

DFILE TH-13-39-2nd-f10-19-1.jdf
COMNT TH-13-39-2nd-f10-19-1
DATIM 06-09-2012 15:55:15
MENUF
MNUF
OBNUC 1H
OFR 395.88 MHz
OBFQ 395.88 MHz
OBSET 6.28 KHz
OBFN 0.87 Hz
PWT 6.38 usec
DEADT 0.00 usec
PREDL 0.00000 msec
IWT 1.0000 sec
POINT 16384
SPO 16384
TIMES 8
DUMMY 1
FREQU 7422.80 Hz
FLT 30000 Hz
DELAY 16.68 usec
ACQTM 2.2073 sec
PD 5.0000 sec
SCANS 8
ADBT 16
RGAIN 30
BF 0.01 Hz
T1 0.00
T2 0.00
T3 90.00
T4 100.00
EXMOD single_pulse.ex2
IRNUC 1H
IFR 395.88 MHz
IRSET 6.28 kHz
IRFN 0.87 Hz
IRRPW 115 usec
IRATN 79
DFILE TH-13-39-2nd-f10-19-1.jdf
SF
LKSET 13.20 KHz
LKFN 75.7 Hz
LKLEV 0
LGAIN 0
LKPHS 0
LKSG 0
CSPED 0 Hz
FILDC
FILDF
CTEMP 23.9 c
SLVNT CDCl3
EXREF 7.26 ppm
    
```

TH-13-39-2nd-f10-19C

C:\Documents and Settings\PC-USER\My Documents\Data\Hoshikawa\13\TH-13-39-2nd-f10-19C-1.jdf

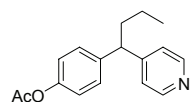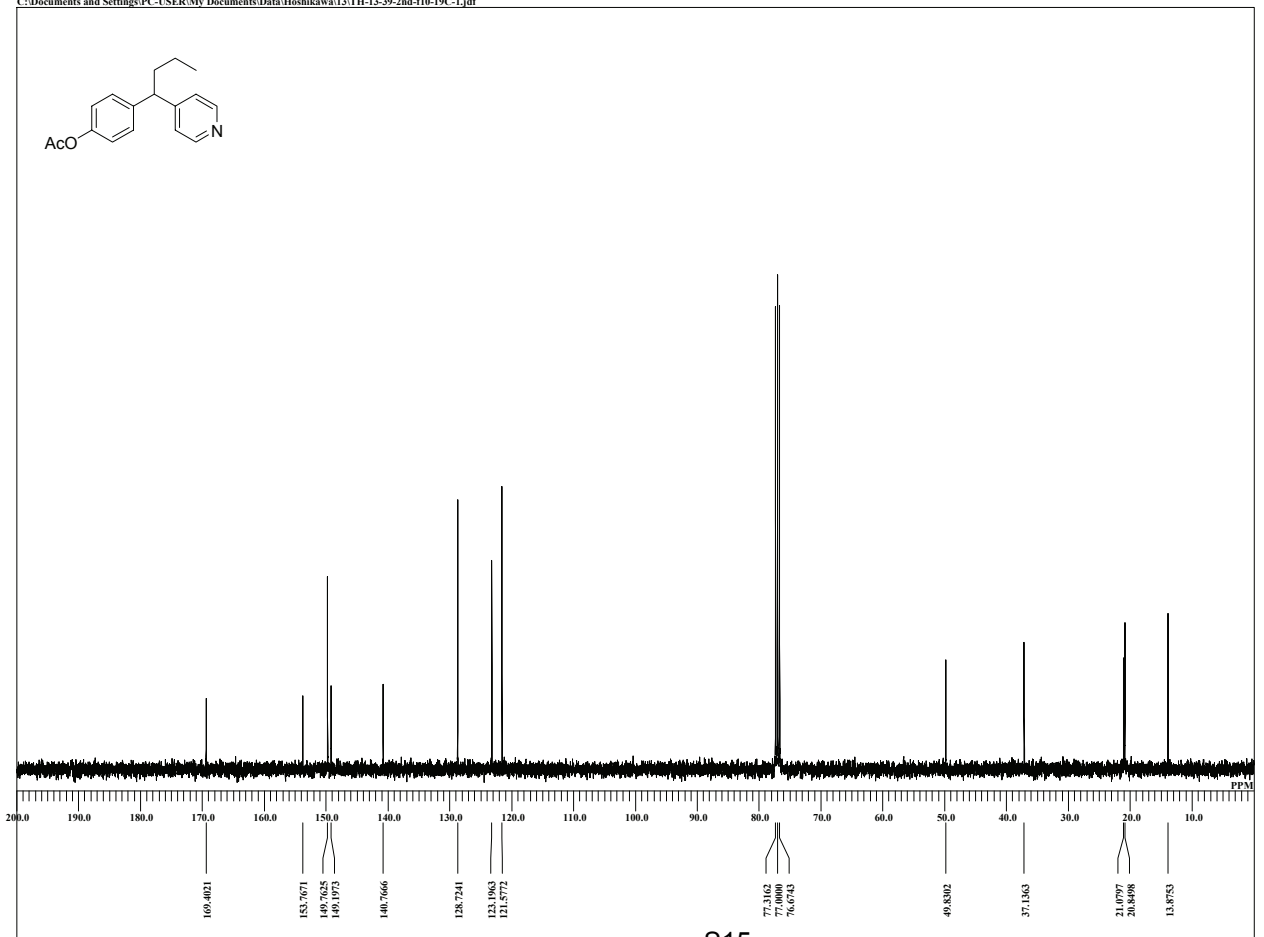

```

DFILE TH-13-39-2nd-f10-19C-1.jdf
COMNT TH-13-39-2nd-f10-19C-1
DATIM 06-09-2012 16:30:01
MENUF
MNUF
OBNUC 13C
OFR 99.58 MHz
OBFQ 99.58 MHz
OBSET 5.13 KHz
OBFN 0.98 Hz
PWT 3.25 usec
DEADT 0.00 usec
PREDL 0.00000 msec
IWT 1.0000 sec
POINT 32768
SPO 32768
TIMES 22
DUMMY 4
FREQU 31250.00 Hz
FLT 125000 Hz
DELAY 20.50 usec
ACQTM 1.0486 sec
PD 8.0000 sec
SCANS 22
ADBT 16
RGAIN 60
BF 1.00 Hz
T1 0.00
T2 0.00
T3 90.00
T4 100.00
EXMOD single_pulse_dec
IRNUC 1H
IFR 395.88 MHz
IRSET 6.28 kHz
IRFN 0.87 Hz
IRRPW 115 usec
IRATN 79
DFILE TH-13-39-2nd-f10-19C-1.jdf
SF
LKSET 13.20 KHz
LKFN 75.7 Hz
LKLEV 0
LGAIN 0
LKPHS 0
LKSG 0
CSPED 0 Hz
FILDC
FILDF
CTEMP 24.2 c
SLVNT CDCl3
EXREF 77.00 ppm
    
```

TH-13-69-f46-50-3rd

C:\Documents and Settings\PC-USER\My Documents\Data\Hoshikawa\13\TH-13-69-f46-50-3rd-1.jdf

3e

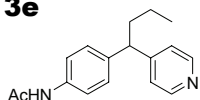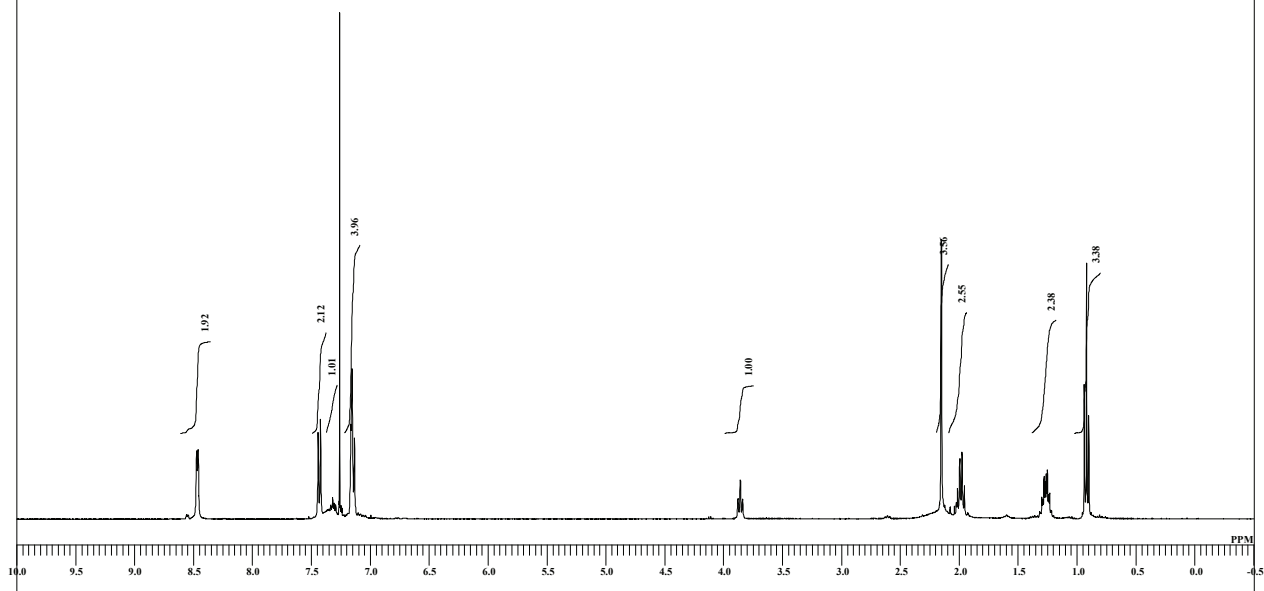

```

DFILE TH-13-69-f46-50-3rd-1.jdf
COMNT TH-13-69-f46-50-3rd
DATIM 03-10-2012 15:47:21
MENUF
MNUF
OBNUC
OBR 395.88 MHz
OBRFQ 395.88 MHz
OBSET 6.28 KHz
OBFIN 0.87 Hz
PWI 6.38 usec
DEADT 0.00 usec
PREDL 0.00000 msec
IWT 1.0000 sec
POINT 16384
SPO 16384
TIMES 8
DUMMY 1
FREQU 7422.80 Hz
FLT 30000 Hz
DELAY 16.68 usec
ACQTM 2.2073 sec
PD 5.0000 sec
SCANS 8
ADBT 16
RGAIN 44
BF 0.12 Hz
T1 0.00
T2 0.00
T3 90.00
T4 100.00
EXMOD single_pulse.ex2
IRNUC 1H
IFR 395.88 MHz
IRSET 6.28 kHz
IRFIN 0.87 Hz
IRRPW 115 usec
IRATN 79
DFILE TH-13-69-f46-50-3rd-1.jdf
SF
LKSET 13.20 KHz
LKFIN 75.7 Hz
LKLEV 0
LGAIN 0
LKPHS 0
LKSG 0
CSPEL 0 Hz
FILDC
FILDF
CTEMP 24.7 c
SLVNT CDCl3
EXREF 7.26 ppm
    
```

TH-13-69-f46-50C

C:\Documents and Settings\PC-USER\My Documents\Data\Hoshikawa\13\TH-13-69-f46-50C-1.jdf

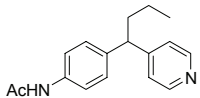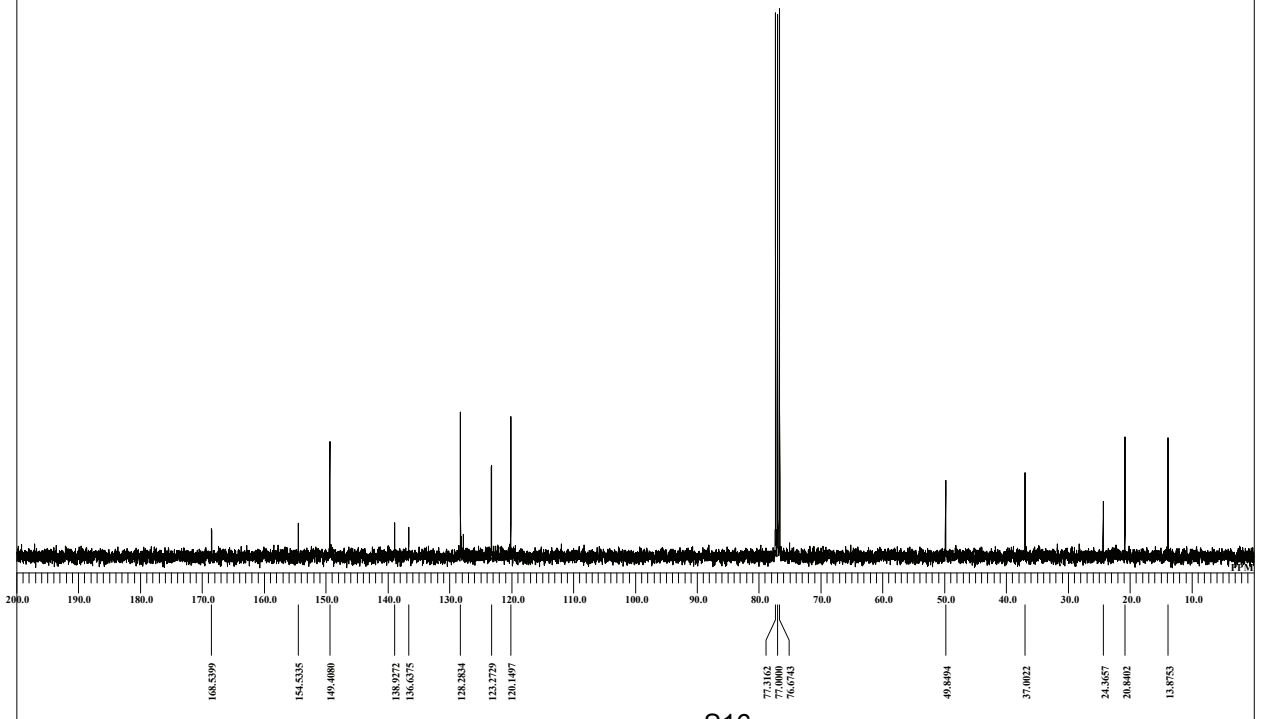

```

DFILE TH-13-69-f46-50C-1.jdf
COMNT TH-13-69-f46-50C
DATIM 03-10-2012 13:13:32
MENUF
MNUF
OBNUC 13C
OBR 99.55 MHz
OBRFQ 99.55 MHz
OBSET 5.13 KHz
OBFIN 0.98 Hz
PWI 3.25 usec
DEADT 0.00 usec
PREDL 0.00000 msec
IWT 1.0000 sec
POINT 32768
SPO 32768
TIMES 30
DUMMY 4
FREQU 31250.00 Hz
FLT 125000 Hz
DELAY 20.50 usec
ACQTM 1.0486 sec
PD 8.0000 sec
SCANS 30
ADBT 16
RGAIN 60
BF 1.00 Hz
T1 0.00
T2 0.00
T3 90.00
T4 100.00
EXMOD single_pulse_dec
IRNUC 1H
IFR 395.88 MHz
IRSET 6.28 kHz
IRFIN 0.87 Hz
IRRPW 115 usec
IRATN 79
DFILE TH-13-69-f46-50C-1.jdf
SF
LKSET 13.20 KHz
LKFIN 75.7 Hz
LKLEV 0
LGAIN 0
LKPHS 0
LKSG 0
CSPEL 0 Hz
FILDC
FILDF
CTEMP 24.9 c
SLVNT CDCl3
EXREF 77.00 ppm
    
```



TH-13-75-f37-42

C:\Documents and Settings\PC-USER\My Documents\Data\Hoshikawa\13\TH-13-75-f37-42.als

3f

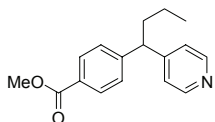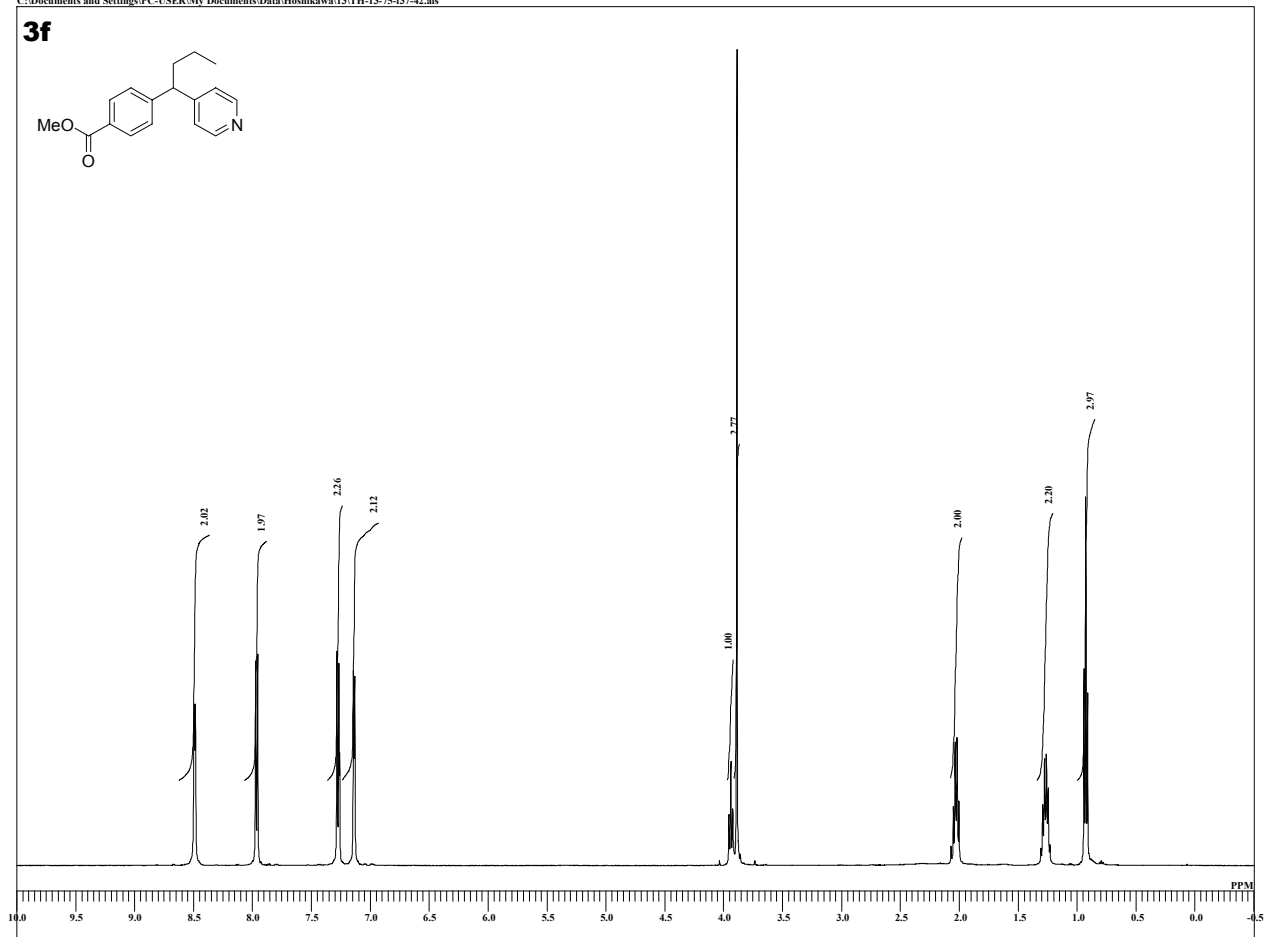

```

DFILE TH-13-75-f37-42.als
COMNT TH-13-75-f37-42
DATIM 26-09-2012 11:12:55
MENUF
OBNUC 1H
OFR 490.15 MHz
OBFREQ 9.16 kHz
OBSET 7.60 Hz
OBFIN 6.50 usec
PWI 0.00 usec
DEADT 0.00000 msec
PREDL 1.0000 sec
IWT 13107
POINT 13107
SPO 8
TIMES 8
DUMMY 1
FREQ 7382.83 Hz
FLT 37000 Hz
DELAY 13.52 usec
ACQTM 1.7826 sec
PD 5.0000 sec
SCANS 8
ADBT 16
RGAIN 36
BF 1.00 Hz
T1 0.00
T2 0.00
T3 100.00
T4 100.00
EXMOD single_pulse.ex2
IRNUC 1H
IFR 490.15 MHz
IRSET 9.16 kHz
IRFIN 7.60 Hz
IRRPW 92 usec
IRATN 79
DFILE TH-13-75-f37-42.als
SF
LKSET 70.30 kHz
LKFIN 32.5 Hz
LKLEV 0
LGAIN 0
LKPHS 0
LKSG 0
CSPED 0 Hz
FILDC
FILDF
CTEMP 26.2 c
SLVNT CDCl3
EXREF 7.26 ppm
    
```

TH-13-75-f37-42C

C:\Documents and Settings\PC-USER\My Documents\Data\Hoshikawa\13\TH-13-75-f37-42C.als

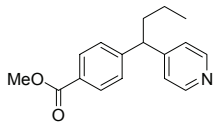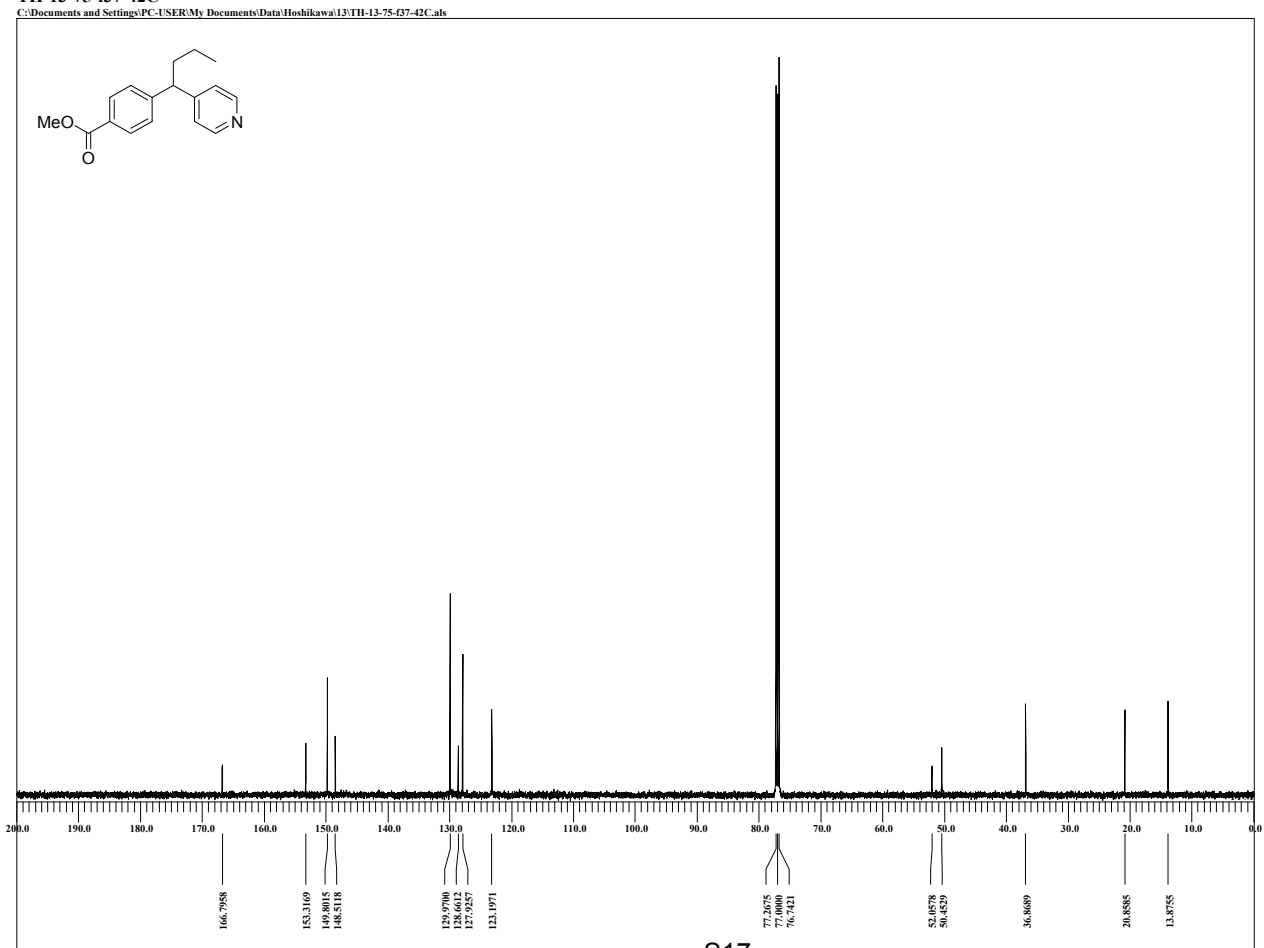

```

DFILE TH-13-75-f37-42C.als
COMNT TH-13-75-f37-42C
DATIM 26-09-2012 12:10:18
MENUF
OBNUC 13C
OFR 123.26 MHz
OBFREQ 123.26 MHz
OBSET 2.31 kHz
OBFIN 6.71 Hz
PWI 3.23 usec
DEADT 0.00 usec
PREDL 0.00000 msec
IWT 1.0000 sec
POINT 26214
SPO 26214
TIMES 360
DUMMY 4
FREQ 30863.73 Hz
FLT 155000 Hz
DELAY 21.06 usec
ACQTM 0.8493 sec
PD 8.0000 sec
SCANS 360
ADBT 16
RGAIN 60
BF 1.00 Hz
T1 0.00
T2 0.00
T3 100.00
T4 100.00
EXMOD single_pulse_dec
IRNUC 1H
IFR 490.15 MHz
IRSET 9.16 kHz
IRFIN 7.60 Hz
IRRPW 92 usec
IRATN 79
DFILE TH-13-75-f37-42C.als
SF
LKSET 70.30 kHz
LKFIN 32.5 Hz
LKLEV 0
LGAIN 0
LKPHS 0
LKSG 0
CSPED 0 Hz
FILDC
FILDF
CTEMP 26.6 c
SLVNT CDCl3
EXREF 77.00 ppm
    
```

TH-13-53-f24-35

C:\Documents and Settings\PC-USER\My Documents\Data\Hoshikawa\13\TH-13-53-f24-35-1.jdf

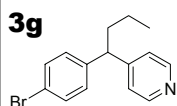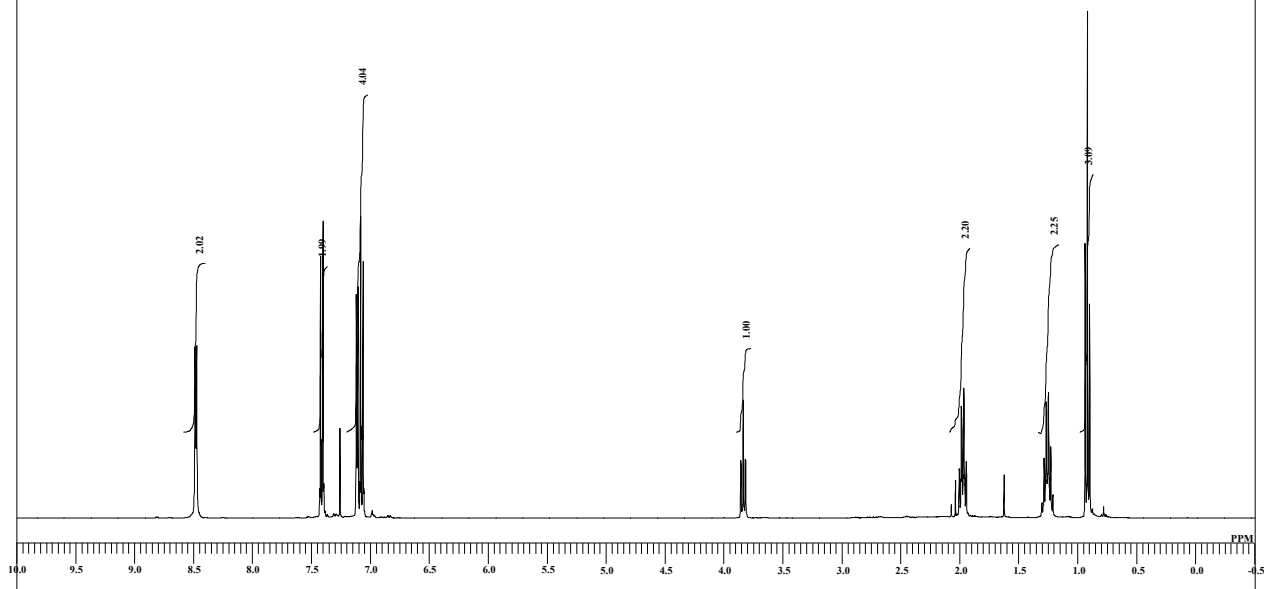

```

DFILE TH-13-53-f24-35-1.jdf
COMNT TH-13-53-f24-35
DATIM 11-09-2012 19:59:41
MENUF
OBNUC 1H
OFR 395.88 MHz
OBFRO 395.88 MHz
OBSET 6.28 KHz
OBFIN 0.87 Hz
PWI 6.38 usec
DEADT 0.00 usec
PREDL 0.00000 msec
IWT 1.0000 sec
POINT 16384
SPO 16384
TIMES 8
DUMMY 1
FREQU 7422.80 Hz
FLT 30000 Hz
DELAY 16.68 usec
ACQTM 2.2073 sec
PD 5.0000 sec
SCANS 8
ADBT 16
RGAIN 34
BF 0.01 Hz
T1 0.00
T2 0.00
T3 90.00
T4 100.00
EXMOD single_pulse.ex2
EXPCM
IRNUC 1H
IFR 395.88 MHz
IRSET 6.28 KHz
IRFIN 0.87 Hz
IRRPW 115 usec
IRATN 79
DFILE TH-13-53-f24-35-1.jdf
SF
LKSET 13.20 KHz
LKFIN 75.7 Hz
LKLEV 0
LGAIN 0
LKPIS 0
LKSG 0
CSPED 0 Hz
FILDC
FILDF
CTEMP 23.5 c
SLVNT CDCl3
EXREF 7.26 ppm
    
```

TH-13-53-f24-35C

C:\Documents and Settings\PC-USER\My Documents\Data\Hoshikawa\13\TH-13-53-f24-35C-1.jdf

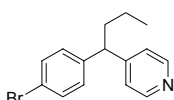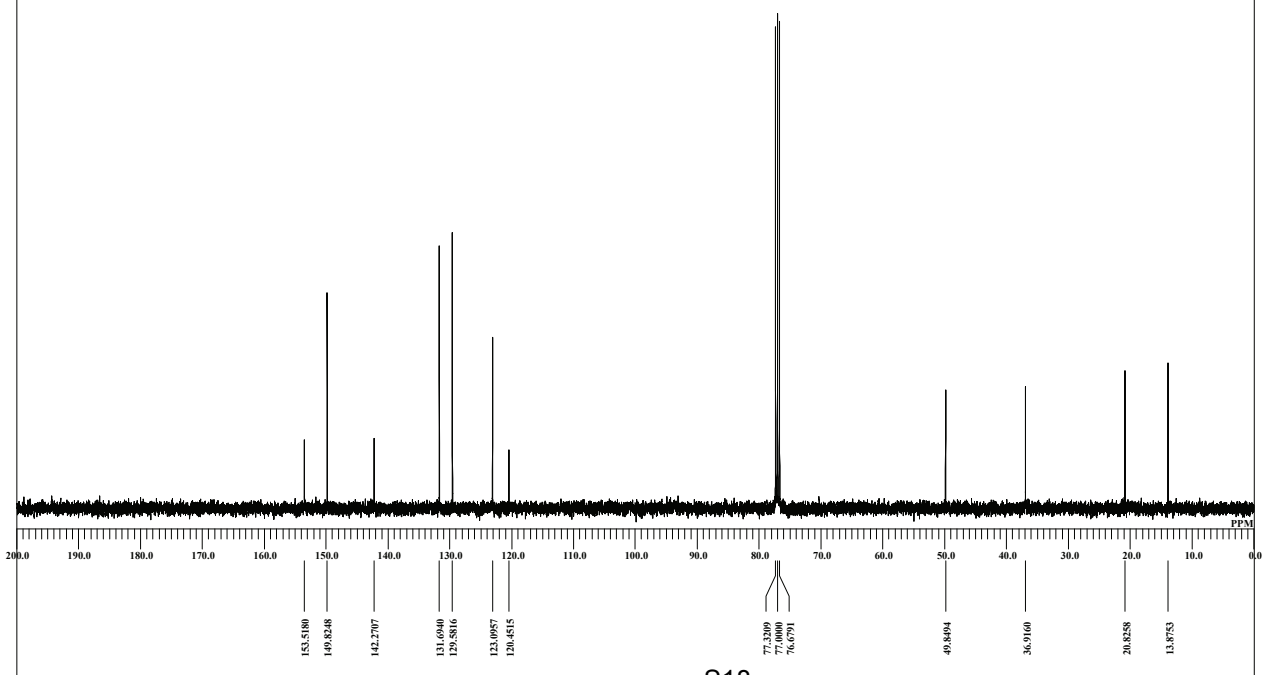

```

DFILE TH-13-53-f24-35C-1.jdf
COMNT TH-13-53-f24-35C
DATIM 11-09-2012 20:05:06
MENUF
OBNUC 13C
OFR 99.55 MHz
OBFRO 99.55 MHz
OBSET 5.13 KHz
OBFIN 0.98 Hz
PWI 3.25 usec
DEADT 0.00 usec
PREDL 0.00000 msec
IWT 1.0000 sec
POINT 65536
SPO 65536
TIMES 42
DUMMY 4
FREQU 31250.00 Hz
FLT 125000 Hz
DELAY 20.50 usec
ACQTM 1.0486 sec
PD 5.0000 sec
SCANS 42
ADBT 16
RGAIN 58
BF 1.00 Hz
T1 0.00
T2 0.00
T3 100.00
T4 100.00
EXMOD single_pulse_dec
EXPCM
IRNUC 1H
IFR 395.88 MHz
IRSET 6.28 KHz
IRFIN 0.87 Hz
IRRPW 115 usec
IRATN 79
DFILE TH-13-53-f24-35C-1.jdf
SF
LKSET 13.20 KHz
LKFIN 75.7 Hz
LKLEV 0
LGAIN 0
LKPIS 0
LKSG 0
CSPED 0 Hz
FILDC
FILDF
CTEMP 23.7 c
SLVNT CDCl3
EXREF 77.00 ppm
    
```

TH-13-63-f22-32H

C:\Documents and Settings\PC-USER\My Documents\Data\Hoshikawa\13\TH-13-63-f22-32H-1.jdf

3h

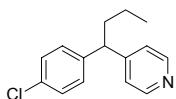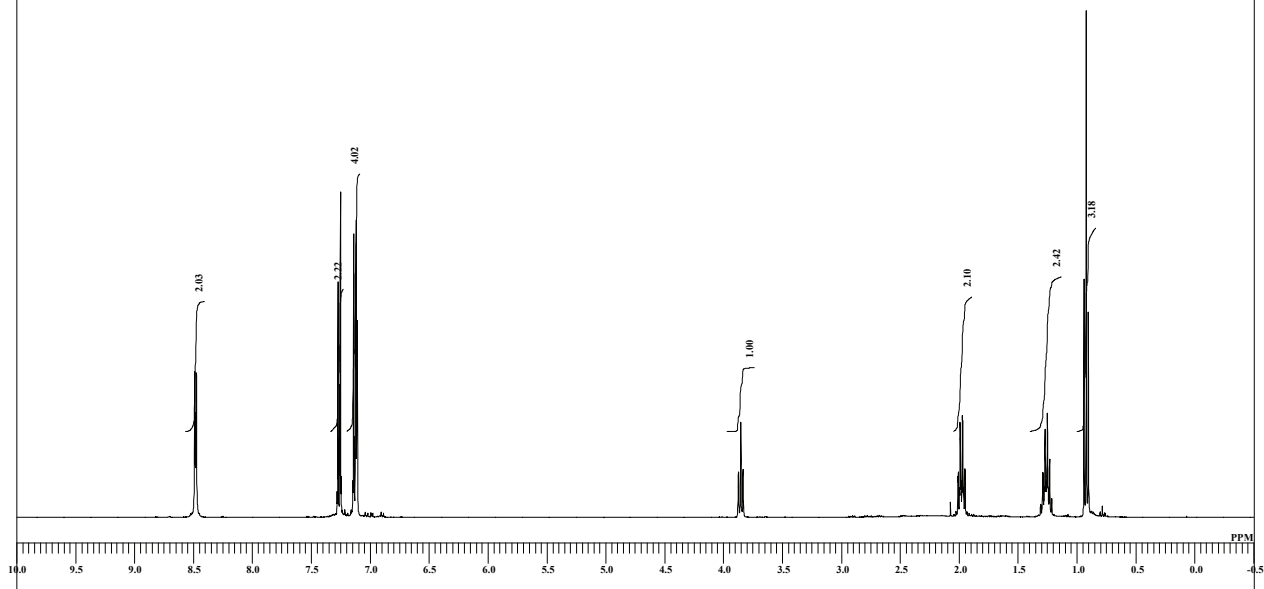

```

DFILE TH-13-63-f22-32H-1.jdf
COMNT TH-13-63-f22-32H
DATIM 25-09-2012 15:27:45
MENUF
OBNUC 1H
OFR 395.88 MHz
OBFREQ 395.88 MHz
OBSET 6.28 KHz
OBFIN 0.87 Hz
PWI 6.38 usec
DEADT 0.00 usec
PREDL 0.00000 msec
IWT 1.0000 sec
POINT 16384
SPO 16384
TIMES 8
DUMMY 1
FREQU 7422.80 Hz
FLT 30000 Hz
DELAY 16.68 usec
ACQTM 2.2073 sec
PD 5.0000 sec
SCANS 8
ADBIT 16
RGAIN 34
BF 0.01 Hz
T1 0.00
T2 0.00
T3 100.00
T4 100.00
EXMOD single_pulse.ex2
IRNUC 1H
IFR 395.88 MHz
IRSET 6.28 kHz
IRFIN 0.87 Hz
IRRPW 115 usec
IRATN 79
DFILE TH-13-63-f22-32H-1.jdf
SF
LKSET 13.20 KHz
LKFIN 75.7 Hz
LKLEV 0
LGAIN 0
LKPHS 0
LKSG 0
CSPED 0 Hz
FILDC
FILDF
CTEMP 24.3 c
SLVNT CDCl3
EXREF 7.26 ppm
    
```

TH-13-63-f22-32C

C:\Documents and Settings\PC-USER\My Documents\Data\Hoshikawa\13\TH-13-63-f22-32C-1.jdf

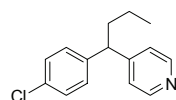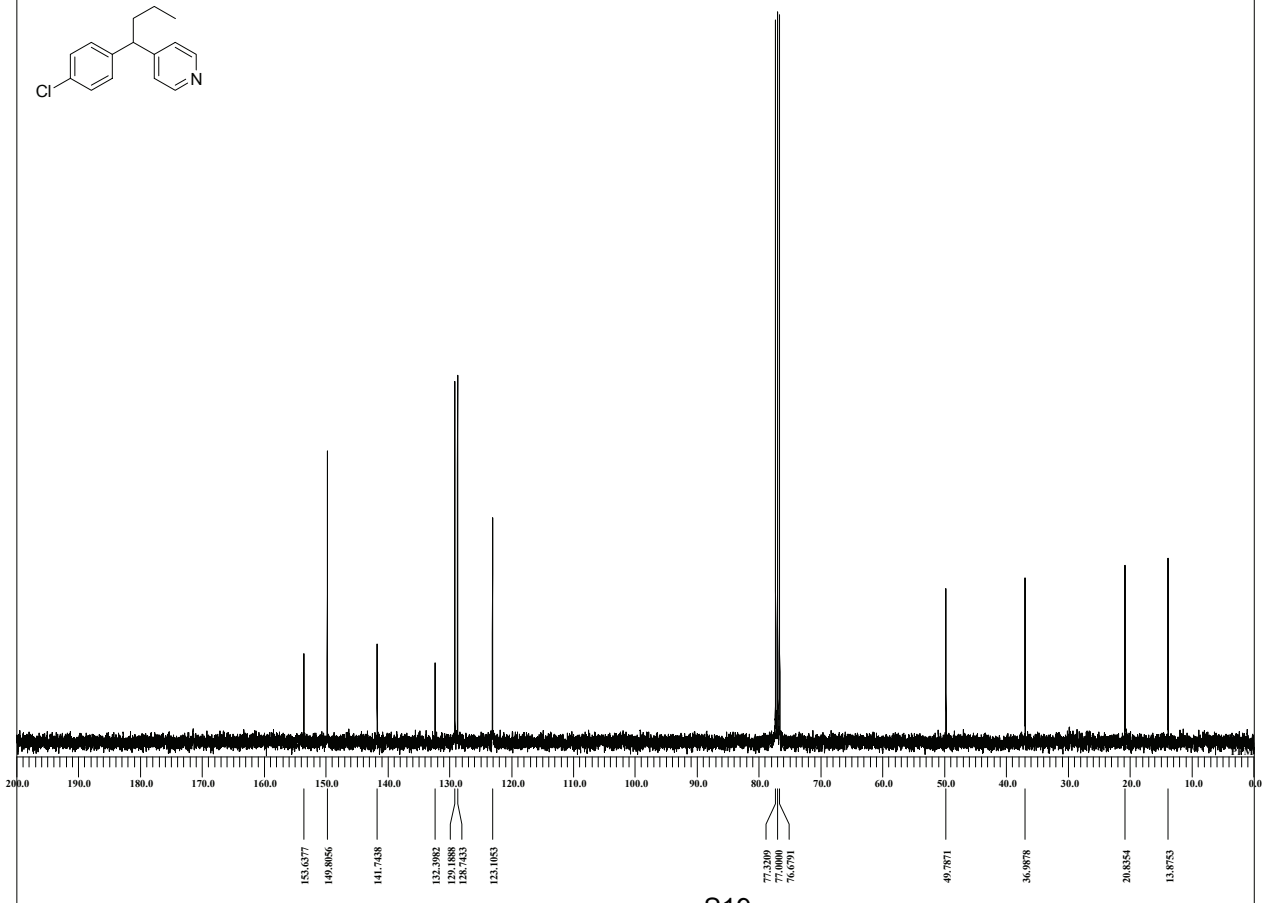

```

DFILE TH-13-63-f22-32C-1.jdf
COMNT TH-13-63-f22-32C
DATIM 25-09-2012 15:35:31
MENUF
OBNUC 13C
OFR 99.58 MHz
OBFREQ 99.58 MHz
OBSET 5.13 KHz
OBFIN 0.98 Hz
PWI 3.25 usec
DEADT 0.00 usec
PREDL 0.00000 msec
IWT 1.0000 sec
POINT 65536
SPO 65536
TIMES 42
DUMMY 4
FREQU 31250.00 Hz
FLT 125000 Hz
DELAY 20.50 usec
ACQTM 1.0486 sec
PD 8.0000 sec
SCANS 42
ADBIT 16
RGAIN 60
BF 1.00 Hz
T1 0.00
T2 0.00
T3 100.00
T4 100.00
EXMOD single_pulse_dec
IRNUC 1H
IFR 395.88 MHz
IRSET 6.28 kHz
IRFIN 0.87 Hz
IRRPW 115 usec
IRATN 79
DFILE TH-13-63-f22-32C-1.jdf
SF
LKSET 13.20 KHz
LKFIN 75.7 Hz
LKLEV 0
LGAIN 0
LKPHS 0
LKSG 0
CSPED 0 Hz
FILDC
FILDF
CTEMP 24.6 c
SLVNT CDCl3
EXREF 77.00 ppm
    
```

TH-13-87-f48-55H

C:\Documents and Settings\PC-USER\My Documents\Data\Hoshikawa\13\TH-13-87-f48-55H-1.jdf

3i

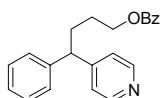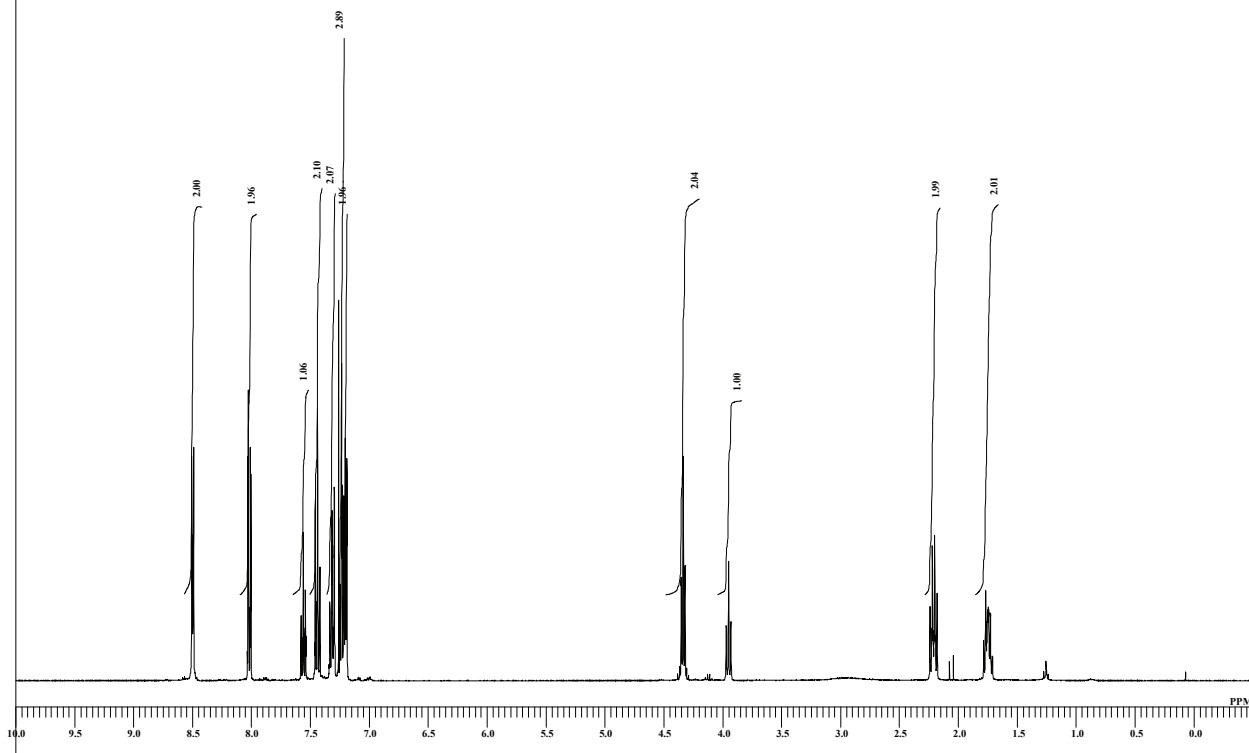

```

DFILE TH-13-87-f48-55H-1.jdf
COMNT TH-13-87-f48-55H
DATIM 09-10-2012 13:05:43
MENUF
MENUC
OBNUC 1H
OFR 395.88 MHz
OBFREQ 395.88 MHz
OBSET 6.28 KHz
OBFIN 0.87 Hz
PWT 6.38 usec
DEADT 0.00 usec
PREDL 0.00000 msec
IWT 1.0000 sec
POINT 16384
SPO 16384
TIMES 8
DUMMY 1
FREQU 7422.80 Hz
FLT 30000 Hz
DELAY 16.68 usec
ACQTM 2.2073 sec
PD 5.0000 sec
SCANS 8
ADBT 16
RGAIN 40
BF 0.01 Hz
T1 0.00
T2 0.00
T3 100.00
T4 100.00
EXMOD single_pulse.ex2
IRNUC 1H
IFR 395.88 MHz
IRSET 6.28 kHz
IRFIN 0.87 Hz
IRRPW 115 usec
IRATN 79
DFILE TH-13-87-f48-55H-1.jdf
SF
LKSET 13.20 KHz
LKFIN 75.7 Hz
LKLEV 0
LGAIN 0
LKPBS 0
LKSG 0
CSPED 0 Hz
FILDC
FILDF
CTEMP 23.4 c
SLVNT CDCl3
EXREF 7.26 ppm
    
```

TH-13-87-f48-55C

C:\Documents and Settings\PC-USER\My Documents\Data\Hoshikawa\13\TH-13-87-f48-55C-1.jdf

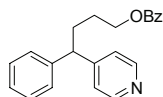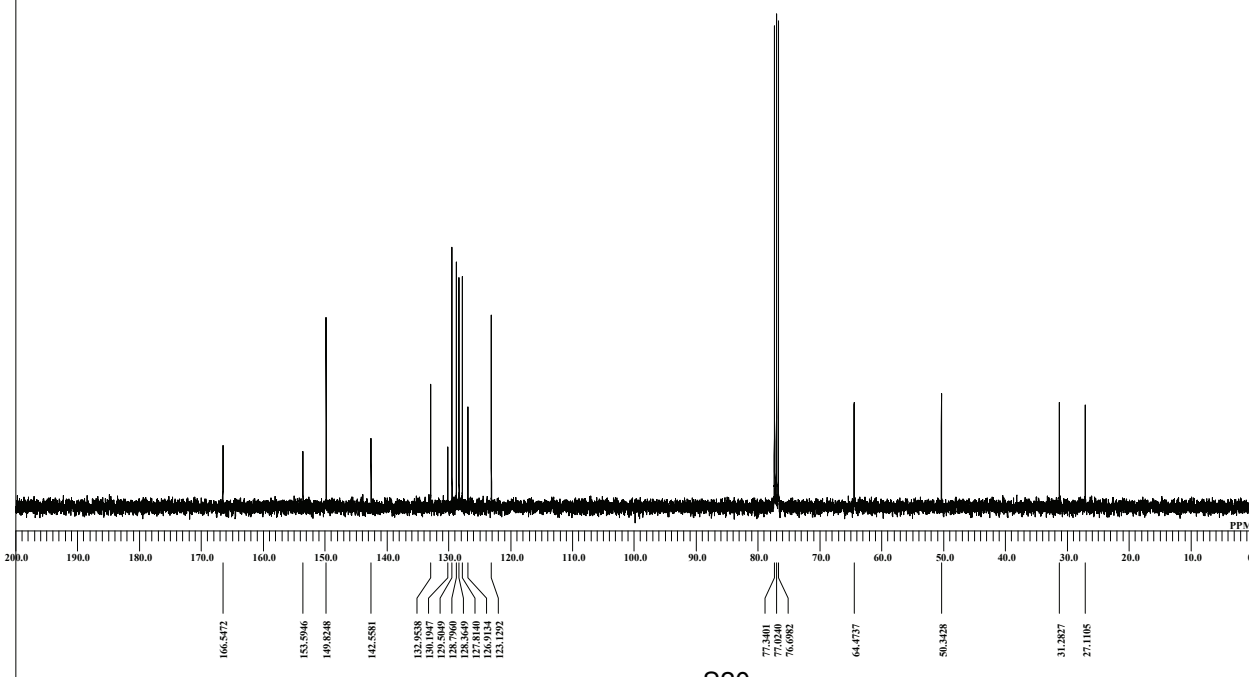

```

DFILE TH-13-87-f48-55C-1.jdf
COMNT TH-13-87-f48-55C
DATIM 09-10-2012 09:17:11
MENUF
MENUC
OBNUC 13C
OFR 99.55 MHz
OBFREQ 99.55 MHz
OBSET 5.13 KHz
OBFIN 0.98 Hz
PWT 3.25 usec
DEADT 0.00 usec
PREDL 0.00000 msec
IWT 1.0000 sec
POINT 65536
SPO 65536
TIMES 26
DUMMY 4
FREQU 31250.00 Hz
FLT 125000 Hz
DELAY 20.50 usec
ACQTM 1.0486 sec
PD 8.0000 sec
SCANS 26
ADBT 16
RGAIN 60
BF 1.00 Hz
T1 0.00
T2 0.00
T3 100.00
T4 100.00
EXMOD single_pulse_dec
IRNUC 1H
IFR 395.88 MHz
IRSET 6.28 kHz
IRFIN 0.87 Hz
IRRPW 115 usec
IRATN 79
DFILE TH-13-87-f48-55C-1.jdf
SF
LKSET 13.20 KHz
LKFIN 75.7 Hz
LKLEV 0
LGAIN 0
LKPBS 0
LKSG 0
CSPED 0 Hz
FILDC
FILDF
CTEMP 22.9 c
SLVNT CDCl3
EXREF 77.00 ppm
    
```

TH-13-107-f42-52

C:\Documents and Settings\PC-USER\My Documents\Data\Hoshikawa\13\TH-13-107-f42-52-1.xls

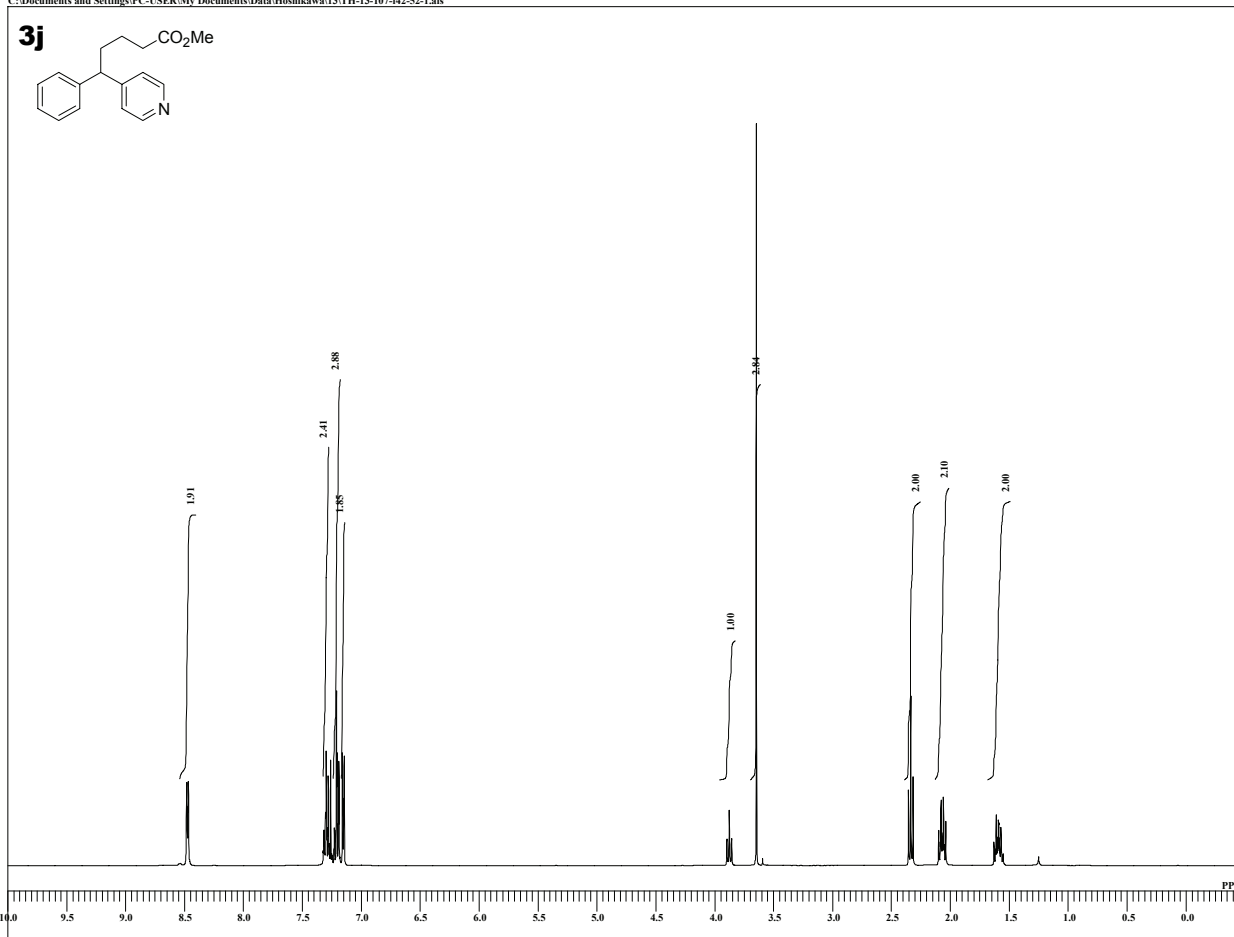

TH-13-107-f42-52-1.xls  
 TH-13-107-f42-52  
 16-10-2012 09:39:10

1H  
 395.88 MHz  
 6.28 KHz  
 0.87 Hz  
 6.38 usec  
 0.00 usec  
 0.000000 msec  
 1.0000 sec  
 16384  
 16384  
 8  
 1  
 7422.80 Hz  
 30000 Hz  
 16.68 usec  
 2.2073 sec  
 5.0000 sec  
 8  
 16  
 36  
 0.01 Hz  
 0.00  
 0.00  
 100.00  
 100.00  
 single\_pulse.ex2

1H  
 395.88 MHz  
 6.28 kHz  
 0.87 Hz  
 115 usec  
 79

TH-13-107-f42-52-1.xls

13.20 KHz  
 75.7 Hz  
 0  
 0  
 0  
 0 Hz  
 22.9 c  
 CDCl3  
 7.26 ppm

TH-13-107-f42-52C

C:\Documents and Settings\PC-USER\My Documents\Data\Hoshikawa\13\TH-13-107-f42-52C-1.jdf

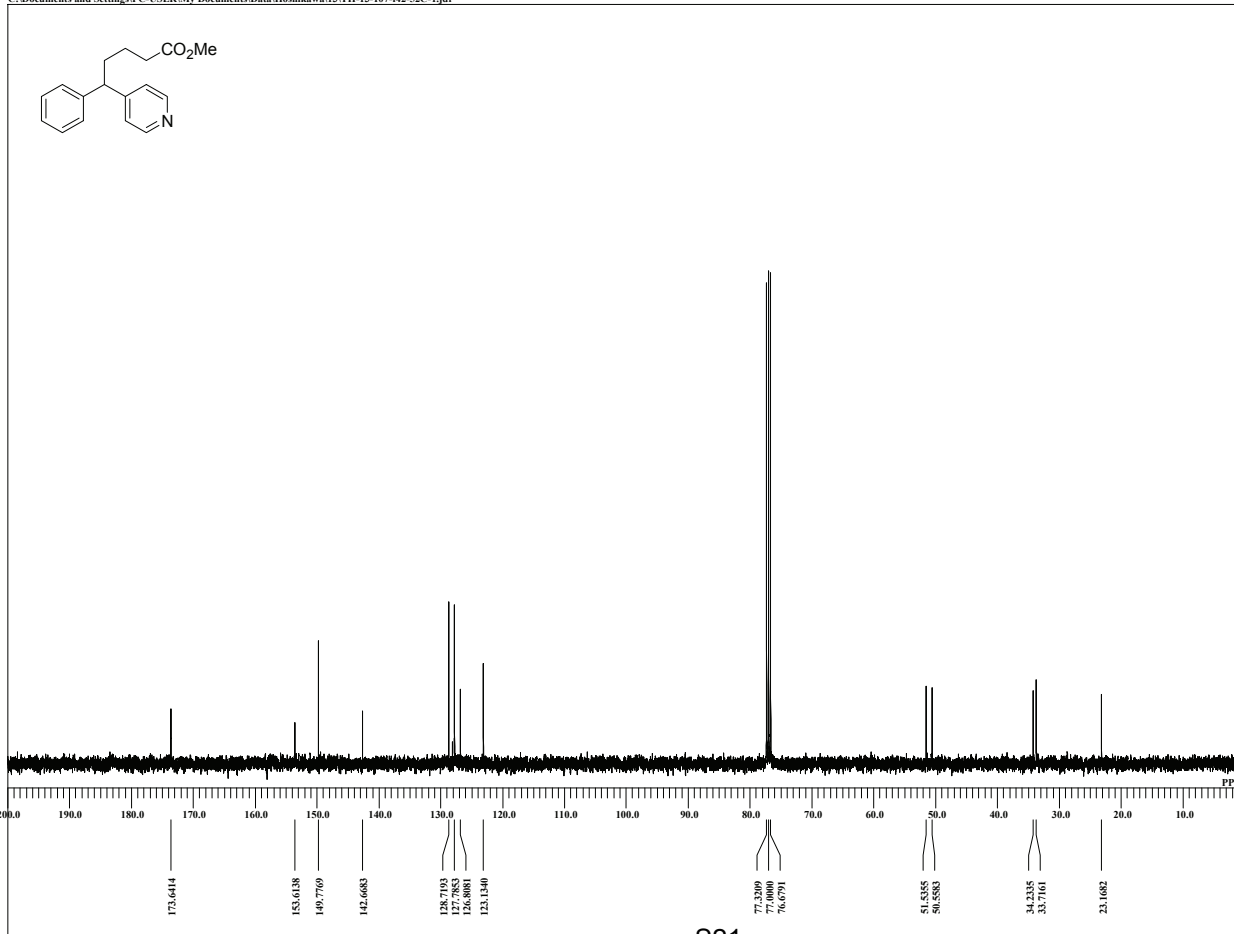

TH-13-107-f42-52C-1.jdf  
 TH-13-107-f42-52C  
 16-10-2012 09:43:56

13C  
 99.55 MHz  
 99.55 MHz  
 5.13 KHz  
 0.98 Hz  
 3.25 usec  
 0.00 usec  
 0.000000 msec  
 1.0000 sec  
 65536  
 65536  
 22  
 4  
 31250.00 Hz  
 125000 Hz  
 20.50 usec  
 1.0486 sec  
 8.0000 sec  
 22  
 16  
 60  
 1.00 Hz  
 0.00  
 0.00  
 100.00  
 100.00  
 single\_pulse\_dec

1H  
 395.88 MHz  
 6.28 kHz  
 0.87 Hz  
 115 usec  
 79

TH-13-107-f42-52C-1.jdf

13.20 KHz  
 75.7 Hz  
 0  
 0  
 0  
 0 Hz  
 23.1 c  
 CDCl3  
 77.00 ppm

TH-13-103-f31-42

C:\Documents and Settings\PC-USER\My Documents\Data\Hoshikawa\13\TH-13-103-f31-42-1.xls

3k

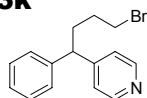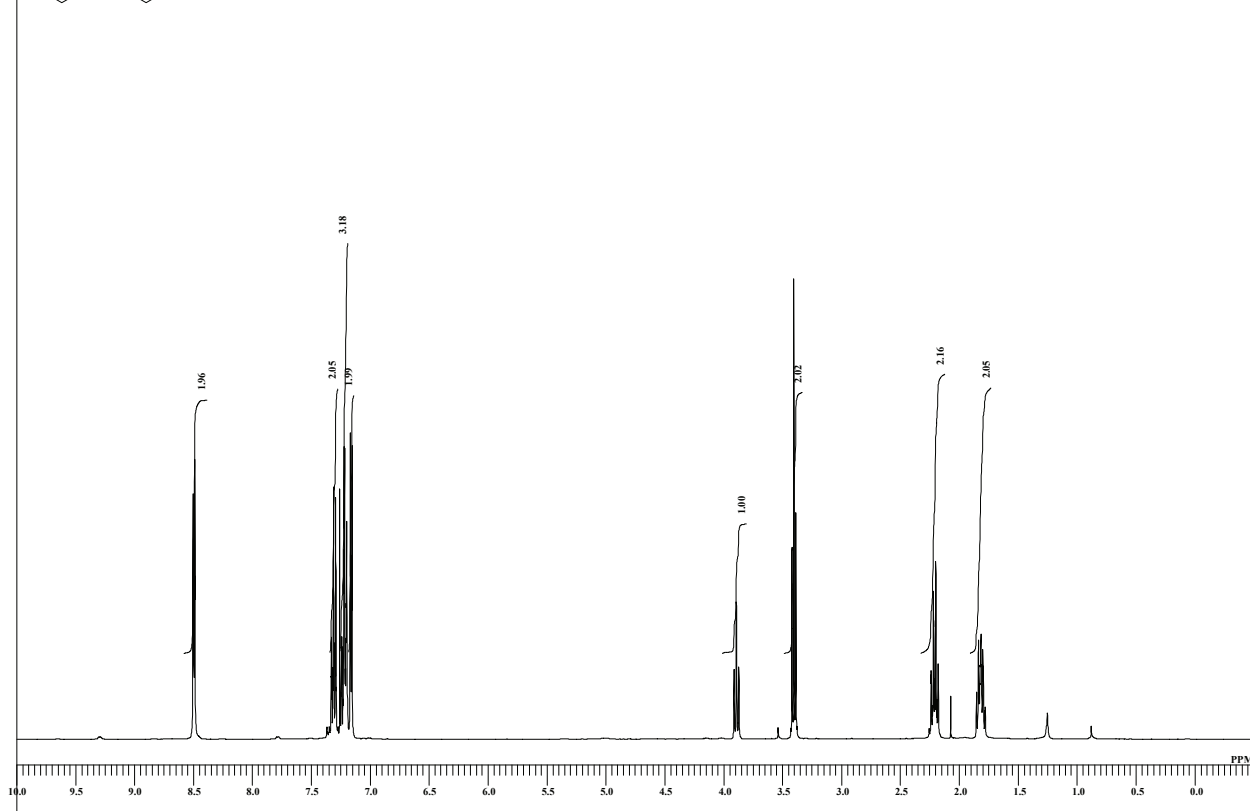

```

DFILE TH-13-103-f31-42-1.xls
COMNT TH-13-103-f31-42
DATIM 12-10-2012 20:51:24
MENUF
OBNUC 1H
OFR 395.88 MHz
OBFREQ 395.88 MHz
OBSET 6.28 KHz
OBFIN 0.87 Hz
PWI 6.38 usec
DEADT 0.00 usec
PREDL 0.00000 msec
IWT 1.0000 sec
POINT 16384
SPO 16384
TIMES 8
DUMMY 1
FREQU 7422.80 Hz
FLT 30000 Hz
DELAY 16.68 usec
ACQTM 2.2073 sec
PD 5.0000 sec
SCANS 8
ADBT 16
RGAIN 36
BF 0.01 Hz
T1 0.00
T2 0.00
T3 100.00
T4 100.00
EXMOD single_pulse.ex2
IRNUC 1H
IFR 395.88 MHz
IRSET 6.28 kHz
IRFIN 0.87 Hz
IRRPW 115 usec
IRATN 79
DFILE TH-13-103-f31-42-1.xls
SF
LKSET 13.20 KHz
LKFIN 75.7 Hz
LKLEV 0
LGAIN 0
LKPHS 0
LKSG 0
CSPED 0 Hz
FILDC
FILDF
CTEMP 23.8 c
SLVNT CDCl3
EXREF 7.26 ppm
    
```

TH-13-103-f31-42C

C:\Documents and Settings\PC-USER\My Documents\Data\Hoshikawa\13\TH-13-103-f31-42C-1.jdf

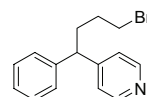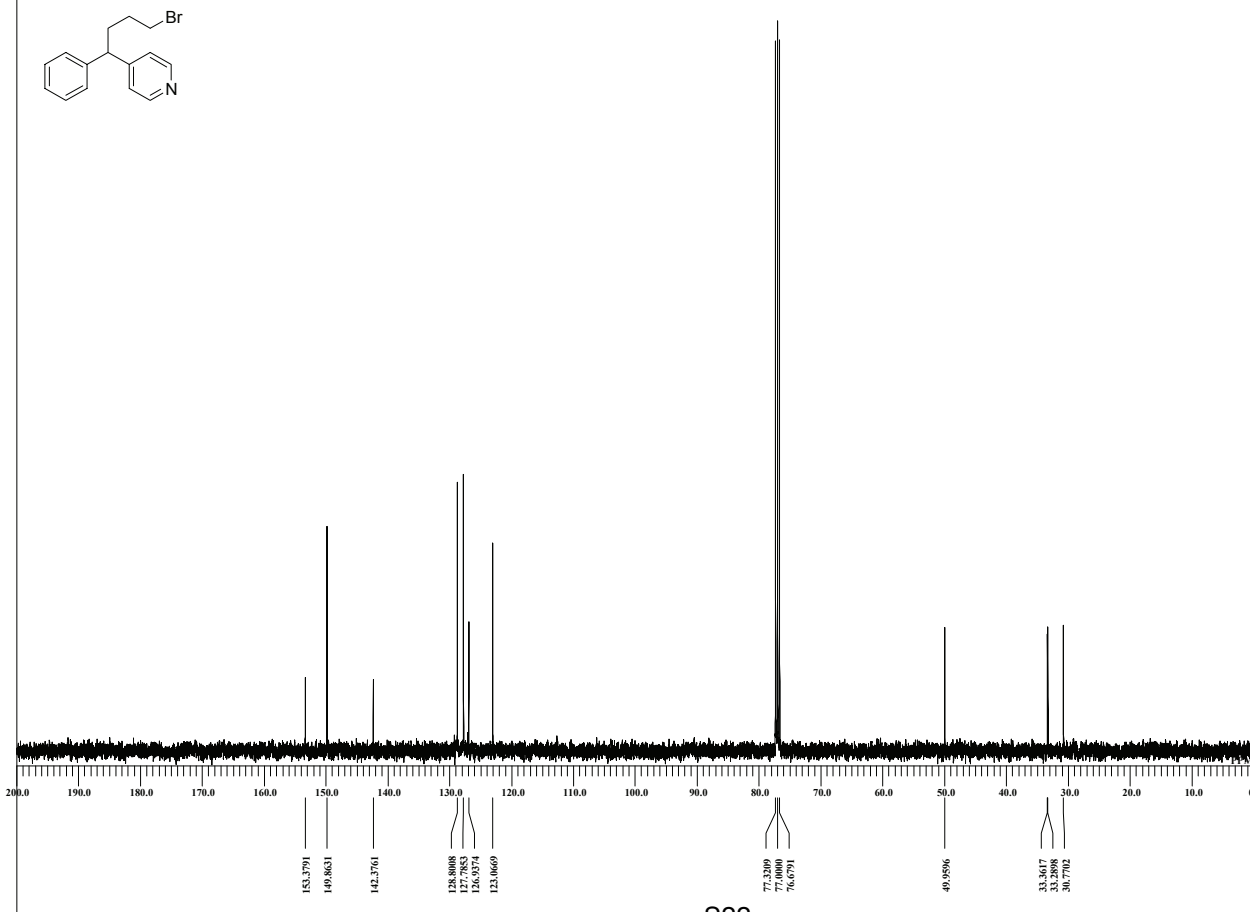

```

DFILE TH-13-103-f31-42C-1.jdf
COMNT TH-13-103-f31-42C
DATIM 12-10-2012 20:59:22
MENUF
OBNUC 13C
OFR 99.55 MHz
OBFREQ 99.55 MHz
OBSET 5.13 KHz
OBFIN 0.98 Hz
PWI 3.25 usec
DEADT 0.00 usec
PREDL 0.00000 msec
IWT 1.0000 sec
POINT 65536
SPO 65536
TIMES 42
DUMMY 4
FREQU 31250.00 Hz
FLT 125000 Hz
DELAY 20.50 usec
ACQTM 1.0486 sec
PD 8.0000 sec
SCANS 42
ADBT 16
RGAIN 60
BF 1.00 Hz
T1 0.00
T2 0.00
T3 100.00
T4 100.00
EXMOD single_pulse_dec
IRNUC 1H
IFR 395.88 MHz
IRSET 6.28 kHz
IRFIN 0.87 Hz
IRRPW 115 usec
IRATN 79
DFILE TH-13-103-f31-42C-1.jdf
SF
LKSET 13.20 KHz
LKFIN 75.7 Hz
LKLEV 0
LGAIN 0
LKPHS 0
LKSG 0
CSPED 0 Hz
FILDC
FILDF
CTEMP 24.1 c
SLVNT CDCl3
EXREF 77.00 ppm
    
```

TH-13-31-f38-46

C:\Documents and Settings\PC-USER\My Documents\Data\Hoshikawa\13\TH-13-31-f38-46-1.Lab

3I

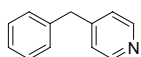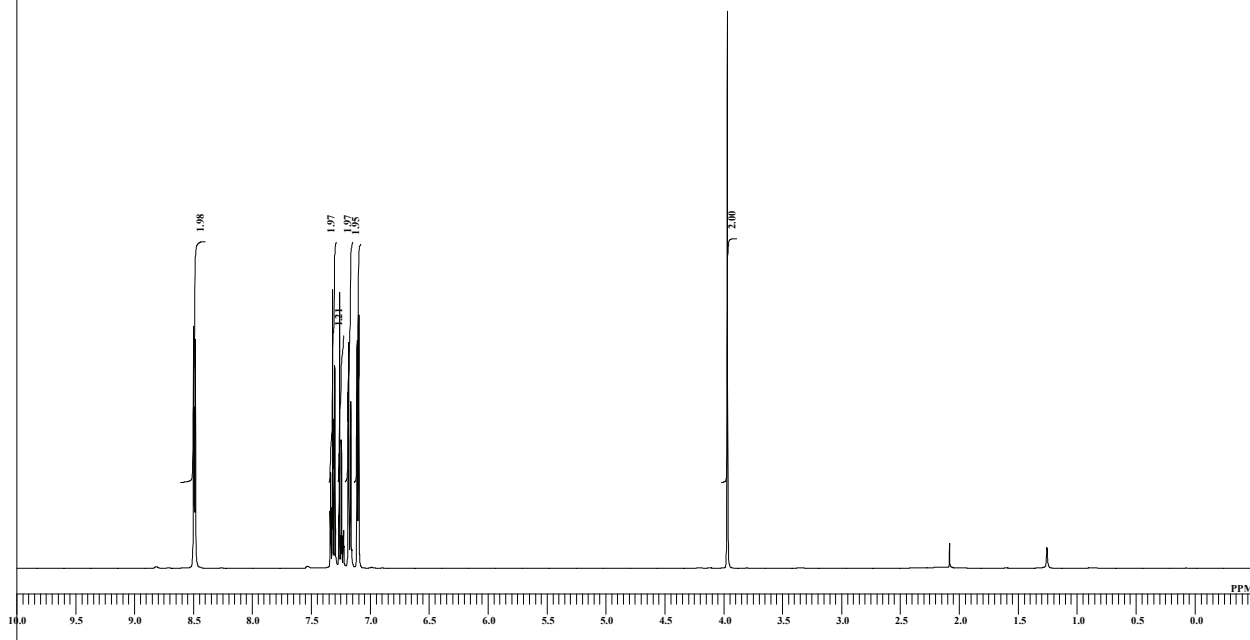

```

DFILE TH-13-31-f38-46-1.Lab
COMNT TH-13-31-f38-46
DATIM 10-09-2012 19:33:11
MENUF
OBNUC 1H
OFR 395.88 MHz
OBFREQ 395.88 MHz
OBSET 6.28 KHz
OBFIN 0.87 Hz
PWI 6.38 usec
DEADT 0.00 usec
PREDL 0.00000 msec
IWT 1.0000 sec
POINT 16384
SPO 16384
TIMES 8
DUMMY 1
FREQU 7422.80 Hz
FLT 30000 Hz
DELAY 16.68 usec
ACQTM 2.2073 sec
PD 5.0000 sec
SCANS 8
ADBT 16
RGAIN 38
BF 0.01 Hz
T1 0.00
T2 0.00
T3 100.00
T4 100.00
EXMOD single_pulse.ex2
IRNUC 1H
IFR 395.88 MHz
IRSET 6.28 kHz
IRFIN 0.87 Hz
IRRPW 115 usec
IRATN 79
DFILE TH-13-31-f38-46-1.Lab
SF
LKSET 13.20 KHz
LKFIN 75.7 Hz
LKLEV 0
LGAIN 0
LKPHS 0
LKSG 0
CSPED 0 Hz
FILDC
FILDF
CTEMP 22.8 c
SLVNT CDCl3
EXREF 7.26 ppm
    
```

TH-13-31-f38-46C

C:\Documents and Settings\PC-USER\My Documents\Data\Hoshikawa\13\TH-13-31-f38-46C-1.Lab

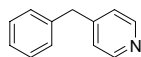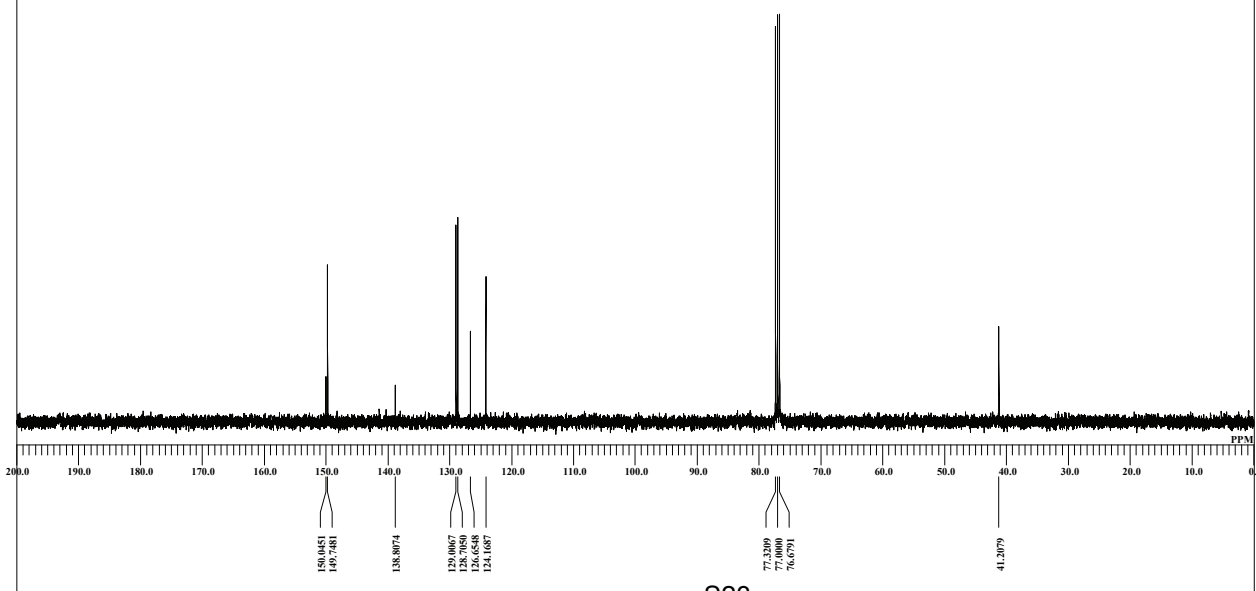

```

DFILE TH-13-31-f38-46C-1.Lab
COMNT TH-13-31-f38-46C
DATIM 10-09-2012 19:36:47
MENUF
OBNUC 13C
OFR 99.55 MHz
OBFREQ 99.55 MHz
OBSET 5.13 KHz
OBFIN 0.98 Hz
PWI 3.25 usec
DEADT 0.00 usec
PREDL 0.00000 msec
IWT 1.0000 sec
POINT 65536
SPO 65536
TIMES 26
DUMMY 4
FREQU 31250.00 Hz
FLT 125000 Hz
DELAY 20.50 usec
ACQTM 1.0486 sec
PD 5.0000 sec
SCANS 26
ADBT 16
RGAIN 60
BF 1.00 Hz
T1 0.00
T2 0.00
T3 100.00
T4 100.00
EXMOD single_pulse_dec
IRNUC 1H
IFR 395.88 MHz
IRSET 6.28 kHz
IRFIN 0.87 Hz
IRRPW 115 usec
IRATN 79
DFILE TH-13-31-f38-46C-1.Lab
SF
LKSET 13.20 KHz
LKFIN 75.7 Hz
LKLEV 0
LGAIN 0
LKPHS 0
LKSG 0
CSPED 0 Hz
FILDC
FILDF
CTEMP 23.0 c
SLVNT CDCl3
EXREF 77.00 ppm
    
```

TH-13-17-f15-29-conc

C:\Documents and Settings\PC-USER\My Documents\Data\Hoshikawa\13\TH-13-17-f15-29-conc-1.jdf

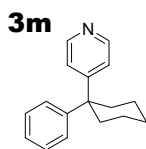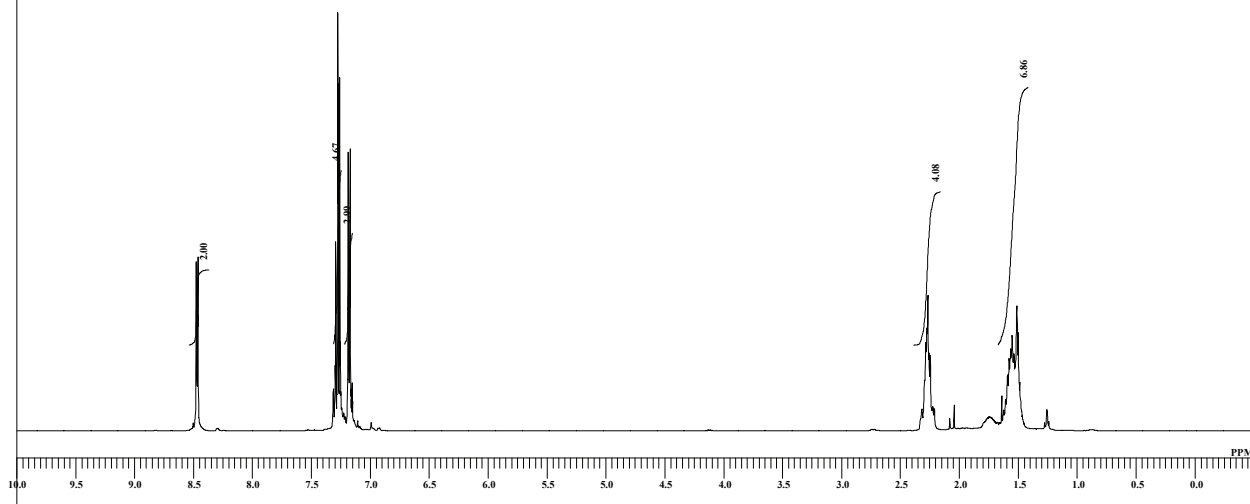

```

DFILE TH-13-17-f15-29-conc-1.jdf
COMNT TH-13-17-f15-29-conc
DATIM 31-08-2012 10:56:11
MENUF
OBNUC 1H
OFR 395.88 MHz
OBFREQ 395.88 MHz
OBSET 6.28 KHz
OBFIN 0.87 Hz
PWI 6.38 usec
DEADT 0.00 usec
PREDL 0.00000 msec
IWT 1.0000 sec
POINT 16384
SPO 16384
TIMES 8
DUMMY 1
FREQU 7422.80 Hz
FLT 30000 Hz
DELAY 16.68 usec
ACQTM 2.2073 sec
PD 5.0000 sec
SCANS 8
ADBIT 16
RGAIN 46
BF 0.01 Hz
T1 0.00
T2 0.00
T3 100.00
T4 100.00
EXMOD single_pulse.ex2
IRNUC 1H
IFR 395.88 MHz
IRSET 6.28 kHz
IRFIN 0.87 Hz
IRRPW 115 usec
IRATN 79
DFILE TH-13-17-f15-29-conc-1.jdf
SF
LKSET 13.20 KHz
LKFIN 75.7 Hz
LKLEV 0
LGAIN 0
LKPHS 0
LKSG 0
CSPED 0 Hz
FILDC
FILDF
CTEMP 24.5 c
SLVNT CDCl3
EXREF 7.26 ppm
    
```

TH-13-17-f15-29

C:\Documents and Settings\PC-USER\My Documents\Data\Hoshikawa\13\TH-13-17-f15-29C-1.jdf

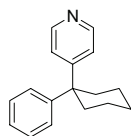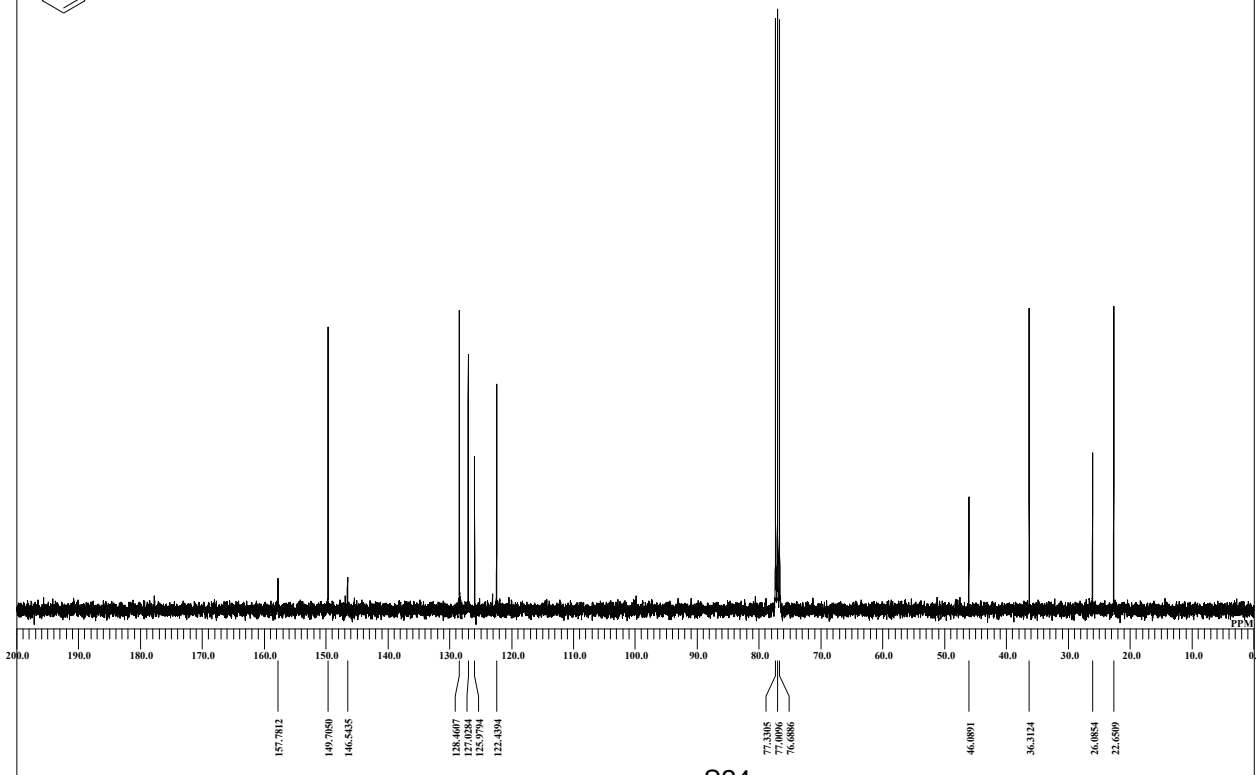

```

DFILE TH-13-17-f15-29C-1.jdf
COMNT TH-13-17-f15-29
DATIM 30-08-2012 10:08:35
MENUF
OBNUC 13C
OFR 99.55 MHz
OBFREQ 99.55 MHz
OBSET 5.13 KHz
OBFIN 0.98 Hz
PWI 3.25 usec
DEADT 0.00 usec
PREDL 0.00000 msec
IWT 1.0000 sec
POINT 65536
SPO 65536
TIMES 42
DUMMY 4
FREQU 31250.00 Hz
FLT 125000 Hz
DELAY 20.50 usec
ACQTM 1.0486 sec
PD 8.0000 sec
SCANS 42
ADBIT 16
RGAIN 60
BF 1.00 Hz
T1 0.00
T2 0.00
T3 100.00
T4 100.00
EXMOD single_pulse_dec
IRNUC 1H
IFR 395.88 MHz
IRSET 6.28 kHz
IRFIN 0.87 Hz
IRRPW 115 usec
IRATN 79
DFILE TH-13-17-f15-29C-1.jdf
SF
LKSET 13.20 KHz
LKFIN 75.7 Hz
LKLEV 0
LGAIN 0
LKPHS 0
LKSG 0
CSPED 0 Hz
FILDC
FILDF
CTEMP 23.3 c
SLVNT CDCl3
EXREF 77.00 ppm
    
```



TH-13-161-f40-45

C:\Documents and Settings\PC-USER\My Documents\Data\Hoshikawa\13\TH-13-161-f40-45-1.jdf

3n

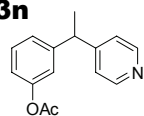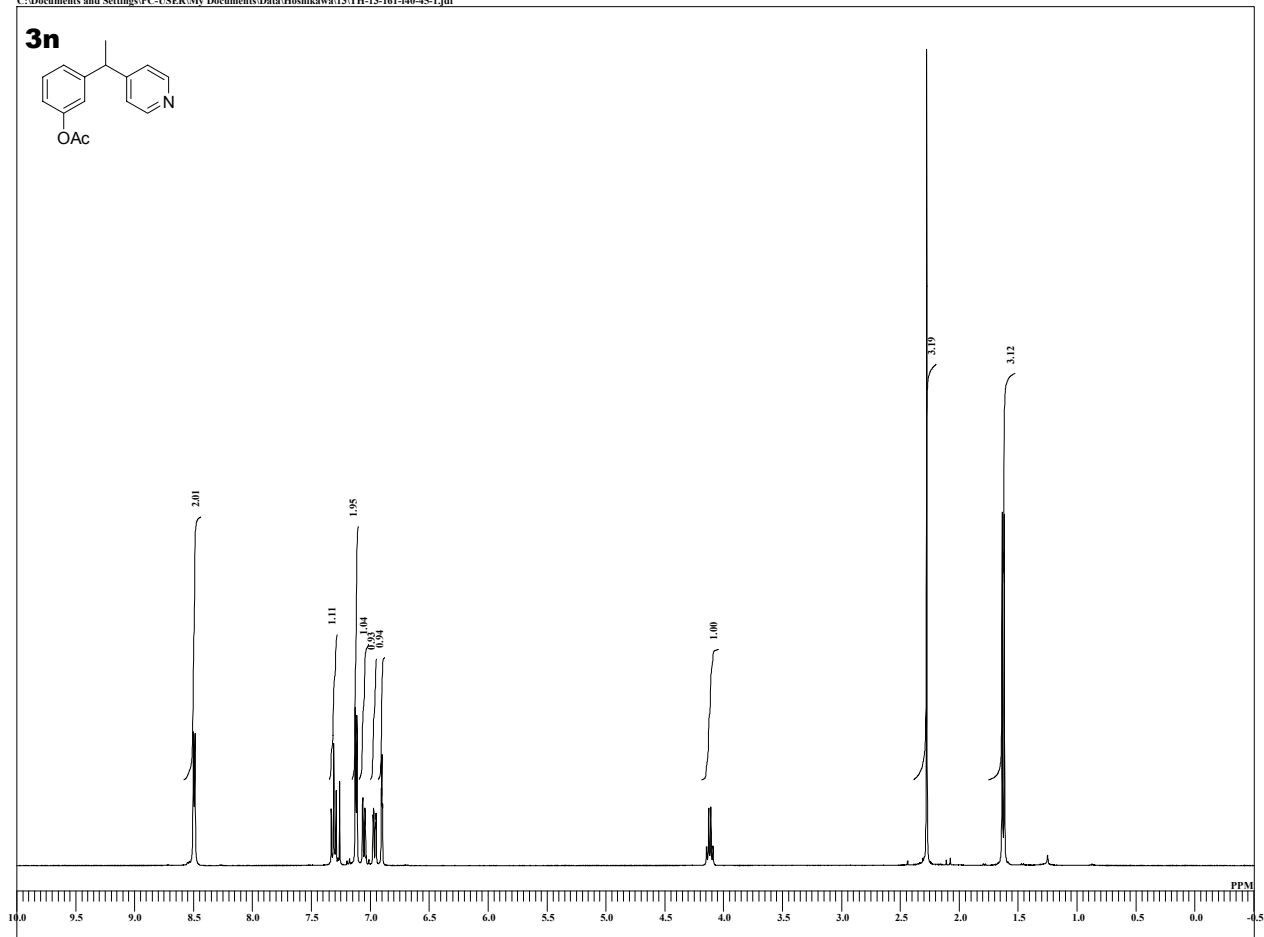

```

DFILE TH-13-161-f40-45-1.jdf
COMNT TH-13-161-f40-45
DATIM 09-11-2012 13:23:05
MENUF
MNUF
OBNUC 1H
OFR 395.88 MHz
OBFQ 395.88 MHz
OBSE 6.28 KHz
OBFN 0.87 Hz
PWT 6.38 usec
DEAD 0.00 usec
PREDL 0.00000 msec
IWT 1.0000 sec
POINT 16384
SPO 16384
TIMES 8
DUMMY 1
FREQU 7422.80 Hz
FLT 30000 Hz
DELAY 16.68 usec
ACQTM 2.2073 sec
PD 5.0000 sec
SCANS 8
ADBT 16
RGAIN 36
BF 0.01 Hz
T1 0.00
T2 0.00
T3 100.00
T4 100.00
EXMOD single_pulse.ex2
IRNUC 1H
IFR 395.88 MHz
IRSE 6.28 kHz
IRFN 0.87 Hz
IRRP 115 usec
IRAT 79
DFILE TH-13-161-f40-45-1.jdf
SF
LKSE 13.20 KHz
LKFN 75.7 Hz
LKLE 0
LGAIN 0
LKPIS 0
LKSG 0
CSPD 0 Hz
FILDC
FILDF
CTEMP 22.5 c
SLVNT CDCl3
EXREF 7.26 ppm
    
```

TH-13-161-f40-45C

C:\Documents and Settings\PC-USER\My Documents\Data\Hoshikawa\13\TH-13-161-f40-45C-1.jdf

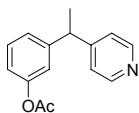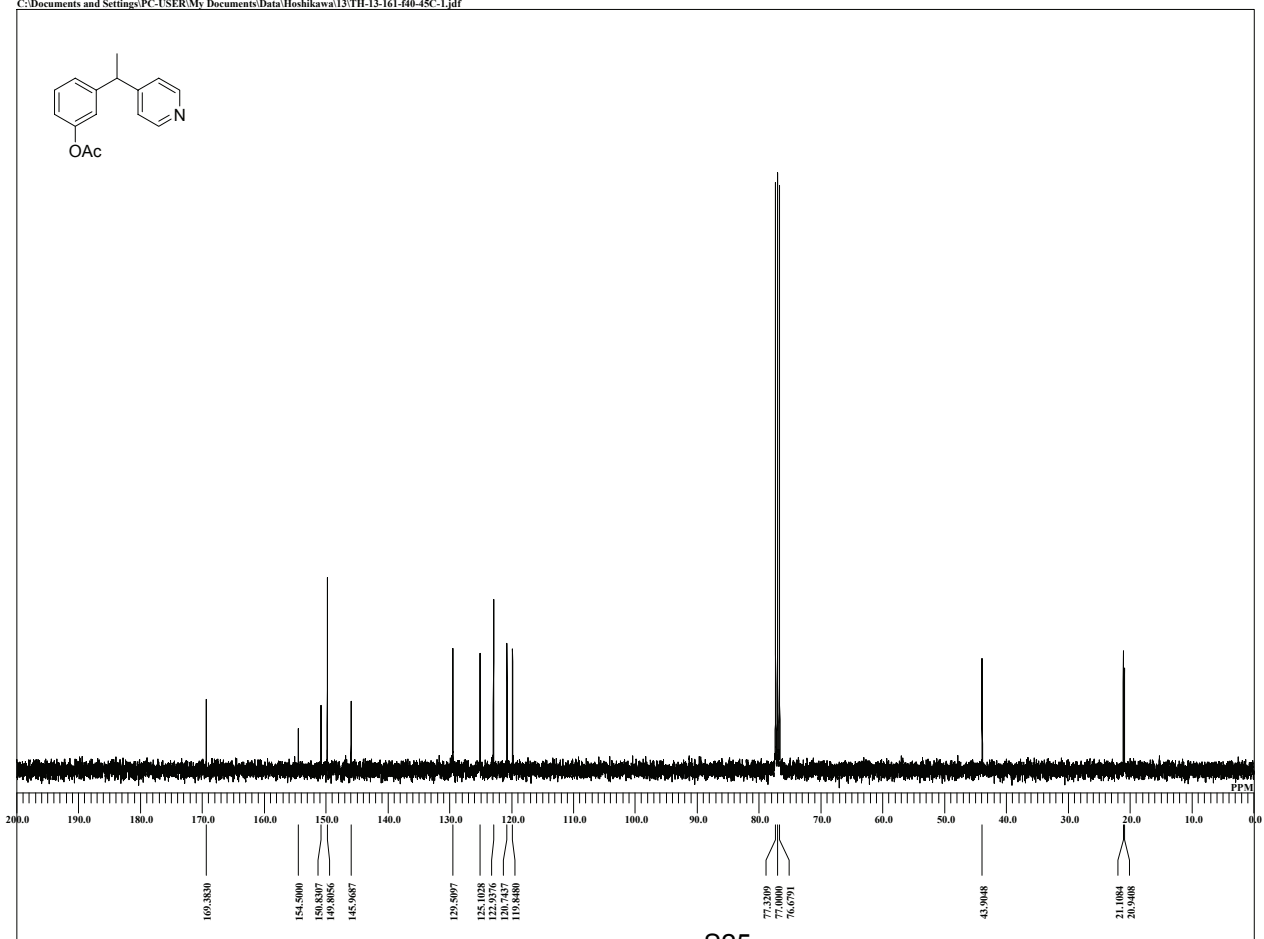

```

DFILE TH-13-161-f40-45C-1.jdf
COMNT TH-13-161-f40-45C
DATIM 09-11-2012 13:28:52
MENUF
MNUF
OBNUC 13C
OFR 99.55 MHz
OBFQ 99.55 MHz
OBSE 5.13 KHz
OBFN 0.98 Hz
PWT 3.25 usec
DEAD 0.00 usec
PREDL 0.00000 msec
IWT 1.0000 sec
POINT 65536
SPO 65536
TIMES 26
DUMMY 4
FREQU 31250.00 Hz
FLT 125000 Hz
DELAY 20.50 usec
ACQTM 1.0486 sec
PD 8.0000 sec
SCANS 26
ADBT 16
RGAIN 60
BF 1.00 Hz
T1 0.00
T2 0.00
T3 100.00
T4 100.00
EXMOD single_pulse_dec
IRNUC 1H
IFR 395.88 MHz
IRSE 6.28 kHz
IRFN 0.87 Hz
IRRP 115 usec
IRAT 79
DFILE TH-13-161-f40-45C-1.jdf
SF
LKSE 13.20 KHz
LKFN 75.7 Hz
LKLE 0
LGAIN 0
LKPIS 0
LKSG 0
CSPD 0 Hz
FILDC
FILDF
CTEMP 22.7 c
SLVNT CDCl3
EXREF 77.00 ppm
    
```

TH-13-159-f52-65

C:\Documents and Settings\PC-USER\My Documents\Data\Hoshikawa\13\TH-13-159-f52-65-1.jdf

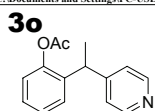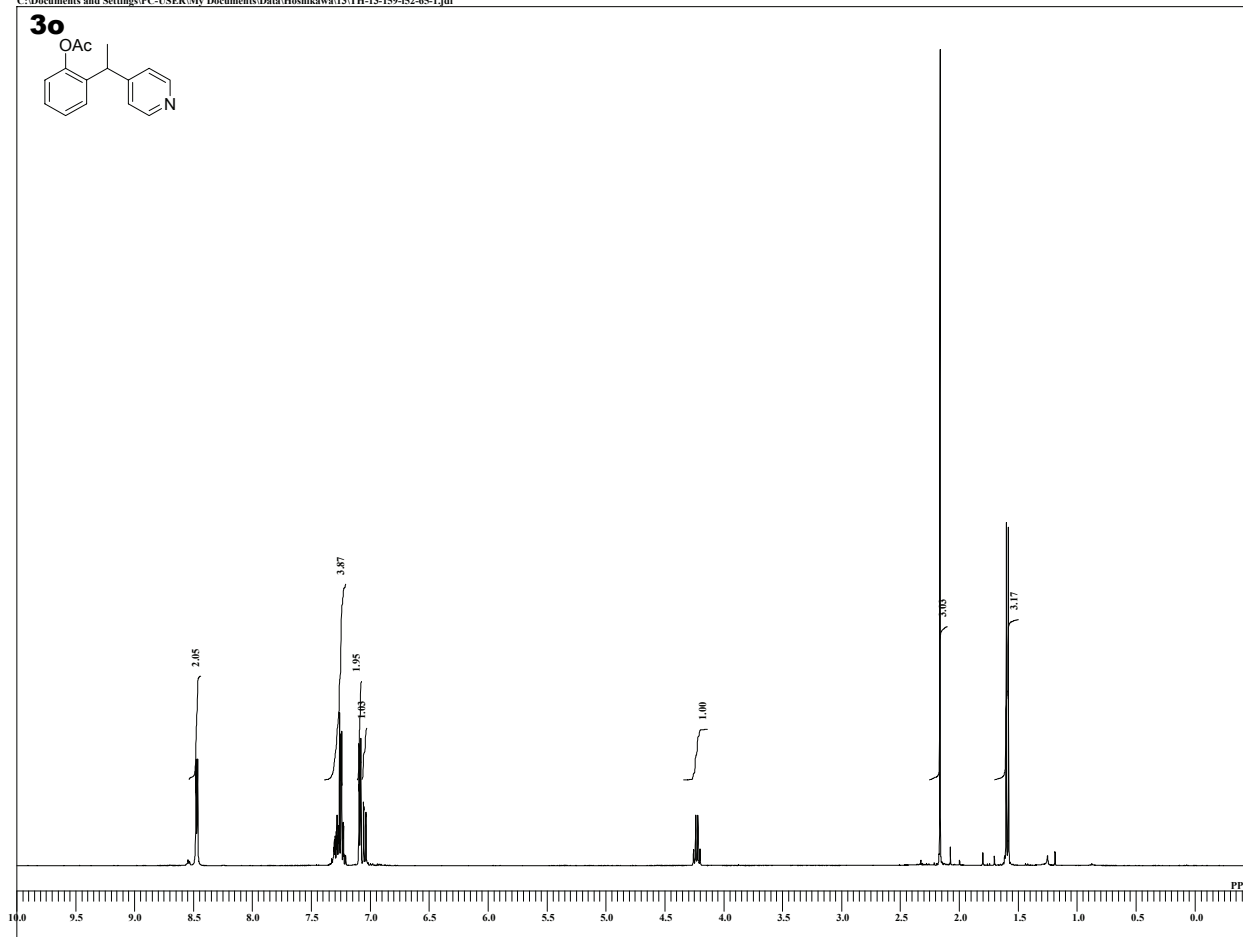

```

DFILE TH-13-159-f52-65-1.jdf
COMNT TH-13-159-f52-65
DATIM 13-11-2012 10:46:37
MENUF
OBNUC 1H
OFR 395.88 MHz
OBFQ 395.88 MHz
OBSE 6.28 KHz
OBFN 0.87 Hz
PWT 6.38 usec
DEAD 0.00 usec
PREDL 0.00000 msec
IWT 1.0000 sec
POINT 16384
SPO 16384
TIMES 8
DUMMY 1
FREQU 7422.80 Hz
FLT 30000 Hz
DELAY 16.68 usec
ACQTM 2.2073 sec
PD 5.0000 sec
SCANS 8
ADBT 16
RGAIN 36
BF 0.01 Hz
T1 0.00
T2 0.00
T3 100.00
T4 100.00
EXMOD single_pulse.ex2
IRNUC 1H
IFR 395.88 MHz
IRSE 6.28 kHz
IRFN 0.87 Hz
IRRP 115 usec
IRATN 79
DFILE TH-13-159-f52-65-1.jdf
SF
LKSE 13.20 KHz
LKFN 75.7 Hz
LKLE 0
LGAIN 0
LKPH 0
LKSG 0
CSPD 0 Hz
FILDC
FILDF
CTEMP 22.5 c
SLVNT CDCl3
EXREF 7.26 ppm
    
```

TH-13-159-f52-65C

C:\Documents and Settings\PC-USER\My Documents\Data\Hoshikawa\13\TH-13-159-f52-65C-1.jdf

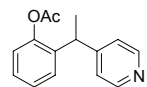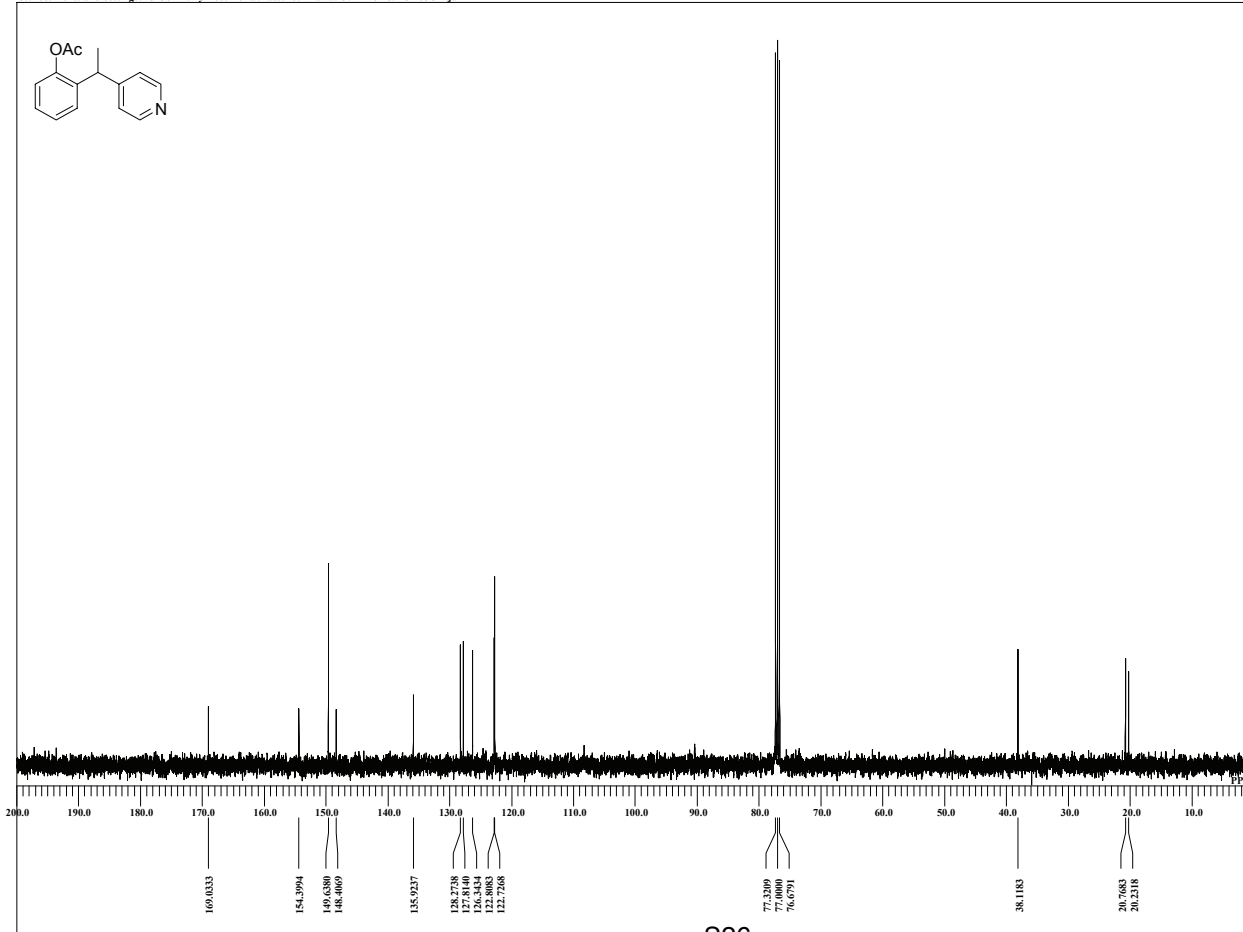

```

DFILE TH-13-159-f52-65C-1.jdf
COMNT TH-13-159-f52-65C
DATIM 13-11-2012 10:51:59
MENUF
OBNUC 13C
OFR 99.58 MHz
OBFQ 99.58 MHz
OBSE 5.13 KHz
OBFN 0.98 Hz
PWT 3.25 usec
DEAD 0.00 usec
PREDL 0.00000 msec
IWT 1.0000 sec
POINT 65536
SPO 65536
TIMES 26
DUMMY 4
FREQU 31250.00 Hz
FLT 125000 Hz
DELAY 20.50 usec
ACQTM 1.0486 sec
PD 8.0000 sec
SCANS 26
ADBT 16
RGAIN 60
BF 1.00 Hz
T1 0.00
T2 0.00
T3 100.00
T4 100.00
EXMOD single_pulse_dec
IRNUC 1H
IFR 395.88 MHz
IRSE 6.28 kHz
IRFN 0.87 Hz
IRRP 115 usec
IRATN 79
DFILE TH-13-159-f52-65C-1.jdf
SF
LKSE 13.20 KHz
LKFN 75.7 Hz
LKLE 0
LGAIN 0
LKPH 0
LKSG 0
CSPD 0 Hz
FILDC
FILDF
CTEMP 22.8 c
SLVNT CDCl3
EXREF 77.00 ppm
    
```

TH-13-119-f44-45

C:\Documents and Settings\PC-USER\My Documents\Data\Hoshikawa\13\TH-13-119-f44-45-2.jdf

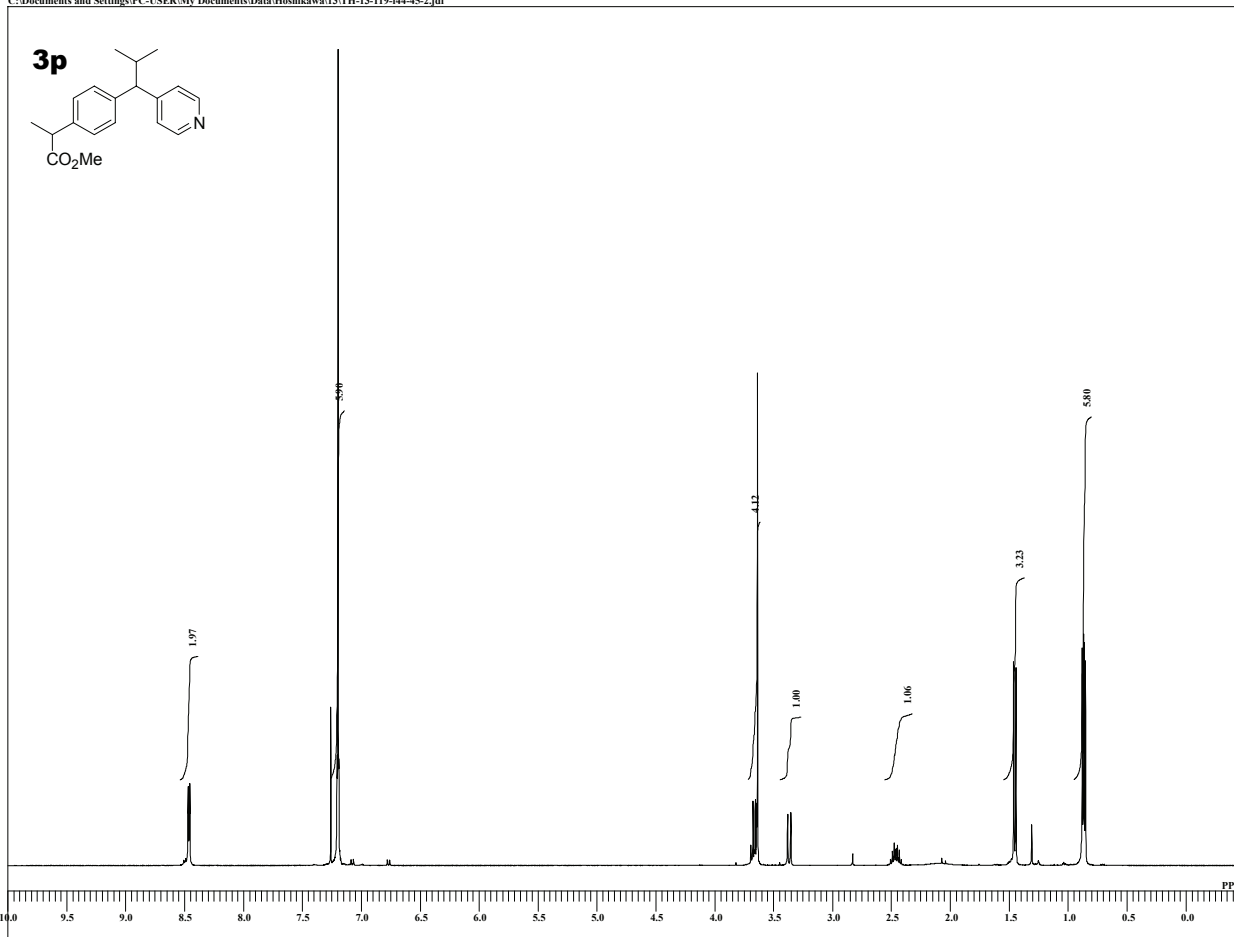

```

DFILE TH-13-119-f44-45-2.jdf
COMNT TH-13-119-f44-45
DATIM 20-10-2012 13:53:09
MENUF
OBNUC 1H
OFR 395.88 MHz
OBFREQ 395.88 MHz
OBSET 6.28 KHz
OBFIN 0.87 Hz
PWI 6.38 usec
DEADT 0.00 usec
PREDL 0.00000 msec
IWT 1.0000 sec
POINT 20480
SPO 20480
TIMES 8
DUMMY 1
FREQU 9778.64 Hz
FLT 30000 Hz
DELAY 16.68 usec
ACQTM 2.2073 sec
PD 5.0000 sec
SCANS 8
ADBT 16
RGAIN 40
BF 0.01 Hz
T1 0.00
T2 0.00
T3 100.00
T4 100.00
EXMOD single_pulse.ex2
EXPFCM
IRNUC 1H
IFR 395.88 MHz
IRSET 6.28 kHz
IRFIN 0.87 Hz
IRRPW 115 usec
IRATN 79
DFILE TH-13-119-f44-45-2.jdf
SF
LKSET 13.20 KHz
LKFIN 75.7 Hz
LKLEV 0
LGAIN 0
LKPBS 0
LKSG 0
CSPED 0 Hz
FILDC
FILDF
CTEMP 23.4 c
SLVNT CDCl3
EXREF 7.26 ppm
    
```

TH-13-119-f44-45C-200times

C:\Documents and Settings\PC-USER\My Documents\Data\Hoshikawa\13\TH-13-119-f44-45C-200times-1.jdf

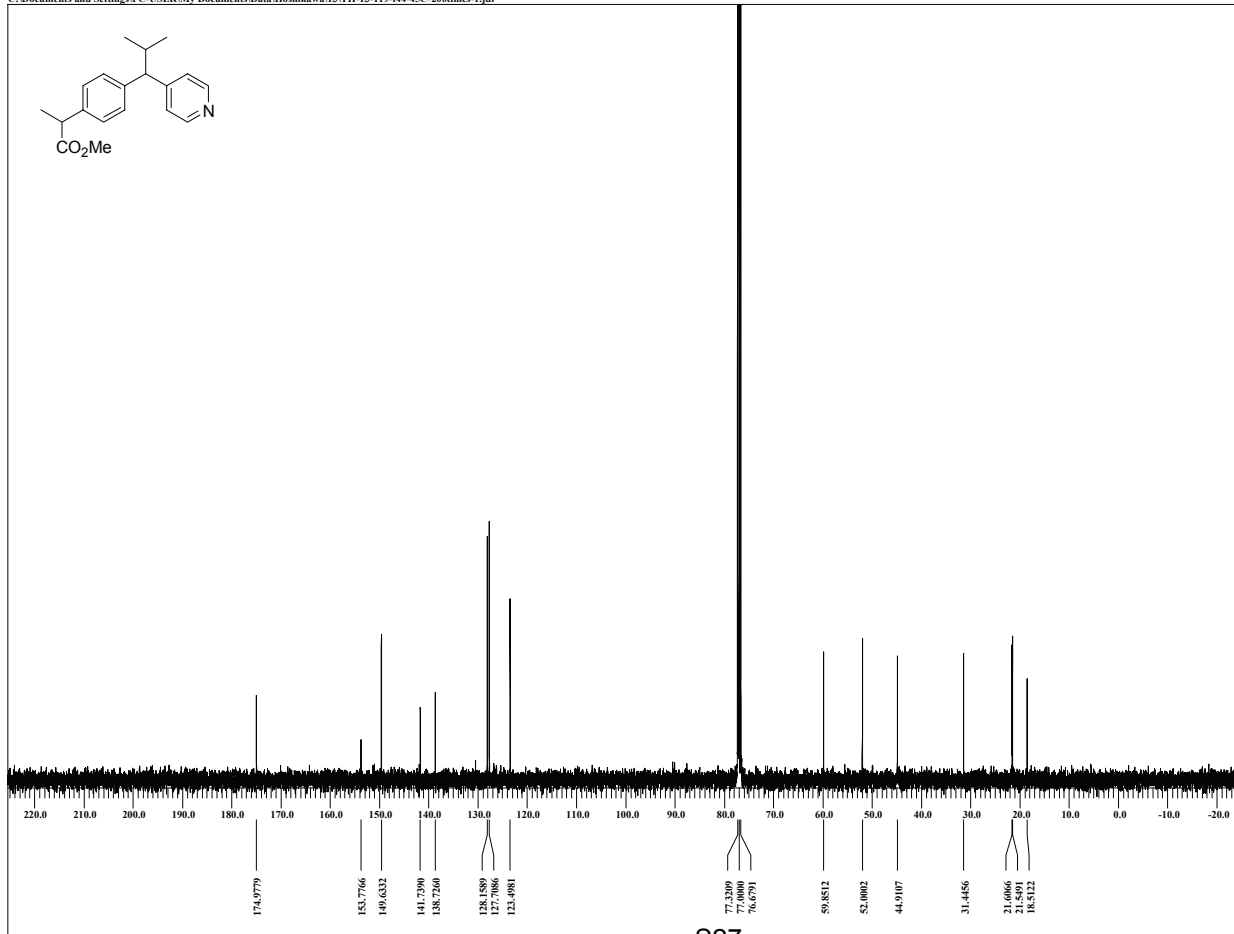

```

DFILE TH-13-119-f44-45C-200times-1.jdf
COMNT TH-13-119-f44-45C-200times
DATIM 22-10-2012 09:47:51
MENUF
OBNUC 13C
OFR 99.55 MHz
OBFREQ 99.55 MHz
OBSET 5.13 KHz
OBFIN 0.98 Hz
PWI 3.25 usec
DEADT 0.00 usec
PREDL 0.00000 msec
IWT 1.0000 sec
POINT 65536
SPO 65536
TIMES 200
DUMMY 4
FREQU 31250.00 Hz
FLT 125000 Hz
DELAY 20.50 usec
ACQTM 1.0486 sec
PD 8.0000 sec
SCANS 200
ADBT 16
RGAIN 60
BF 1.00 Hz
T1 0.00
T2 0.00
T3 100.00
T4 100.00
EXMOD single_pulse_dec
EXPFCM
IRNUC 1H
IFR 395.88 MHz
IRSET 6.28 kHz
IRFIN 0.87 Hz
IRRPW 115 usec
IRATN 79
DFILE TH-13-119-f44-45C-200times-1.jdf
SF
LKSET 13.20 KHz
LKFIN 75.7 Hz
LKLEV 0
LGAIN 0
LKPBS 0
LKSG 0
CSPED 0 Hz
FILDC
FILDF
CTEMP 23.0 c
SLVNT CDCl3
EXREF 77.00 ppm
    
```

TH-13-99-2nd-f17-24

C:\Documents and Settings\PC-USER\My Documents\Data\Hoshikawa\13\TH-13-99-2nd-f17-24-1.jdf

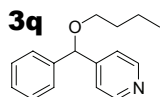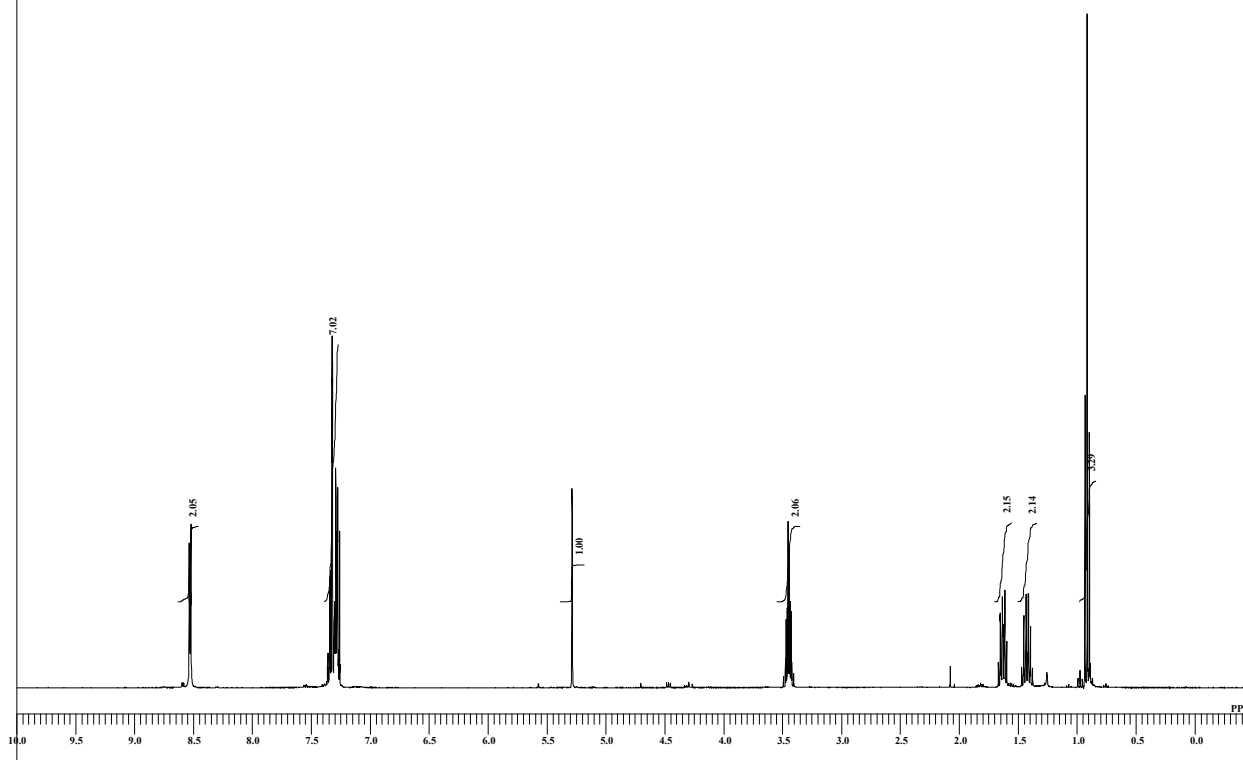

```

DFILE TH-13-99-2nd-f17-24-1.jdf
COMNT TH-13-99-2nd-f17-24
DATIM 12-10-2012 13:41:25
MENUF
MENUC
OBNUC 1H
OFR 395.88 MHz
OBFREQ 395.88 MHz
OBSET 6.28 KHz
OBFIN 0.87 Hz
PWT 6.38 usec
DEADT 0.00 usec
PREDL 0.00000 msec
IWT 1.0000 sec
POINT 16384
SPO 16384
TIMES 8
DUMMY 1
FREQU 7422.80 Hz
FLT 30000 Hz
DELAY 16.68 usec
ACQTM 2.2073 sec
PD 5.0000 sec
SCANS 8
ADBIT 16
RGAIN 34
BF 0.01 Hz
T1 0.00
T2 0.00
T3 100.00
T4 100.00
EXMOD single_pulse.ex2
IRNUC 1H
IFR 395.88 MHz
IRSET 6.28 kHz
IRFIN 0.87 Hz
IRRPW 147 usec
IRATN 79
DFILE TH-13-99-2nd-f17-24-1.jdf
SF
LKSET 13.20 KHz
LKFIN 75.7 Hz
LKLEV 0
LGAIN 0
LKPBS 0
LKSG 0
CSPED 0 Hz
FILDC
FILDF
CTEMP 23.6 c
SLVNT CDCl3
EXREF 7.26 ppm
    
```

TH-13-99-2nd-f17-24C

C:\Documents and Settings\PC-USER\My Documents\Data\Hoshikawa\13\TH-13-99-2nd-f17-24C-1.jdf

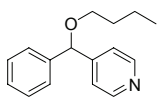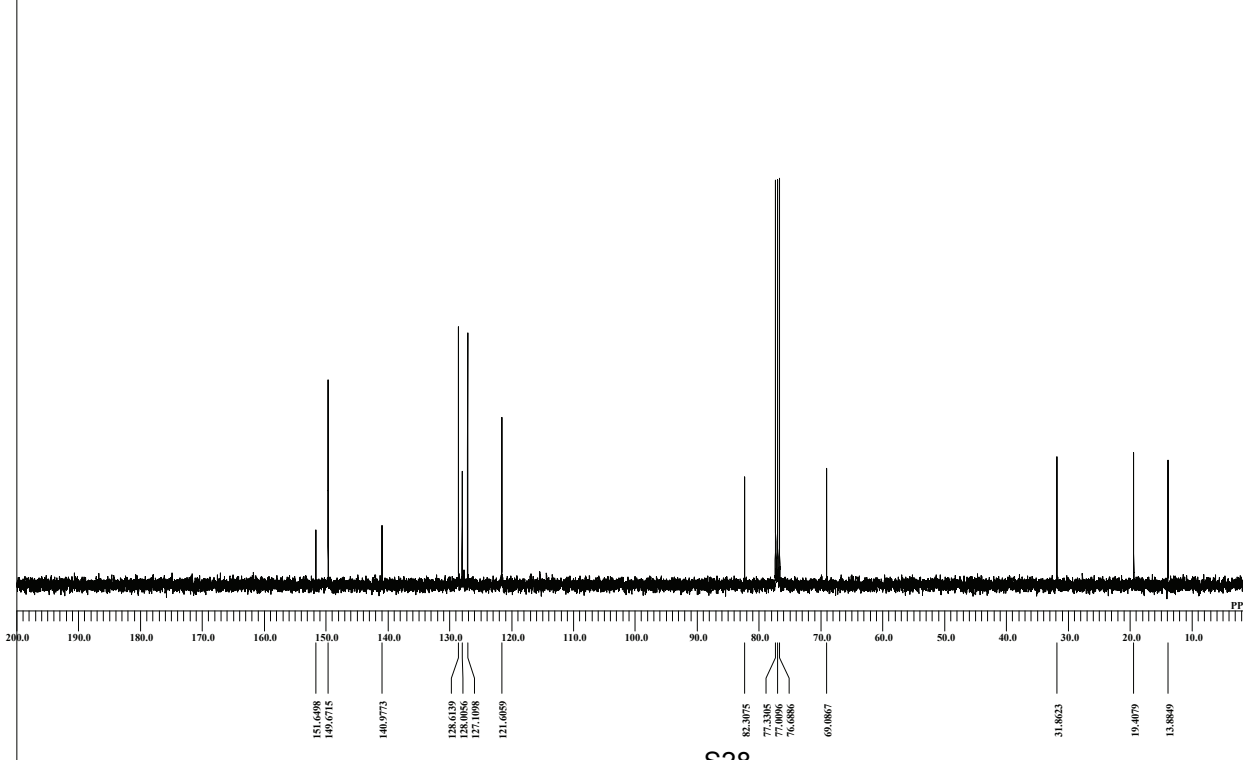

```

DFILE TH-13-99-2nd-f17-24C-1.jdf
COMNT TH-13-99-2nd-f17-24C
DATIM 12-10-2012 13:45:26
MENUF
MENUC
OBNUC 13C
OFR 99.55 MHz
OBFREQ 99.55 MHz
OBSET 5.13 KHz
OBFIN 0.98 Hz
PWT 3.25 usec
DEADT 0.00 usec
PREDL 0.00000 msec
IWT 1.0000 sec
POINT 65536
SPO 65536
TIMES 30
DUMMY 4
FREQU 31250.00 Hz
FLT 125000 Hz
DELAY 20.50 usec
ACQTM 1.0486 sec
PD 5.0000 sec
SCANS 30
ADBIT 16
RGAIN 60
BF 1.00 Hz
T1 0.00
T2 0.00
T3 100.00
T4 100.00
EXMOD single_pulse_dec
IRNUC 1H
IFR 395.88 MHz
IRSET 6.28 kHz
IRFIN 0.87 Hz
IRRPW 115 usec
IRATN 79
DFILE TH-13-99-2nd-f17-24C-1.jdf
SF
LKSET 13.20 KHz
LKFIN 75.7 Hz
LKLEV 0
LGAIN 0
LKPBS 0
LKSG 0
CSPED 0 Hz
FILDC
FILDF
CTEMP 23.8 c
SLVNT CDCl3
EXREF 77.00 ppm
    
```

TH-13-57-f24-37-crystal

C:\Documents and Settings\PC-USER\My Documents\Data\Hoshikawa\13\TH-13-57-f24-37-crystal-H.jdf

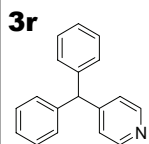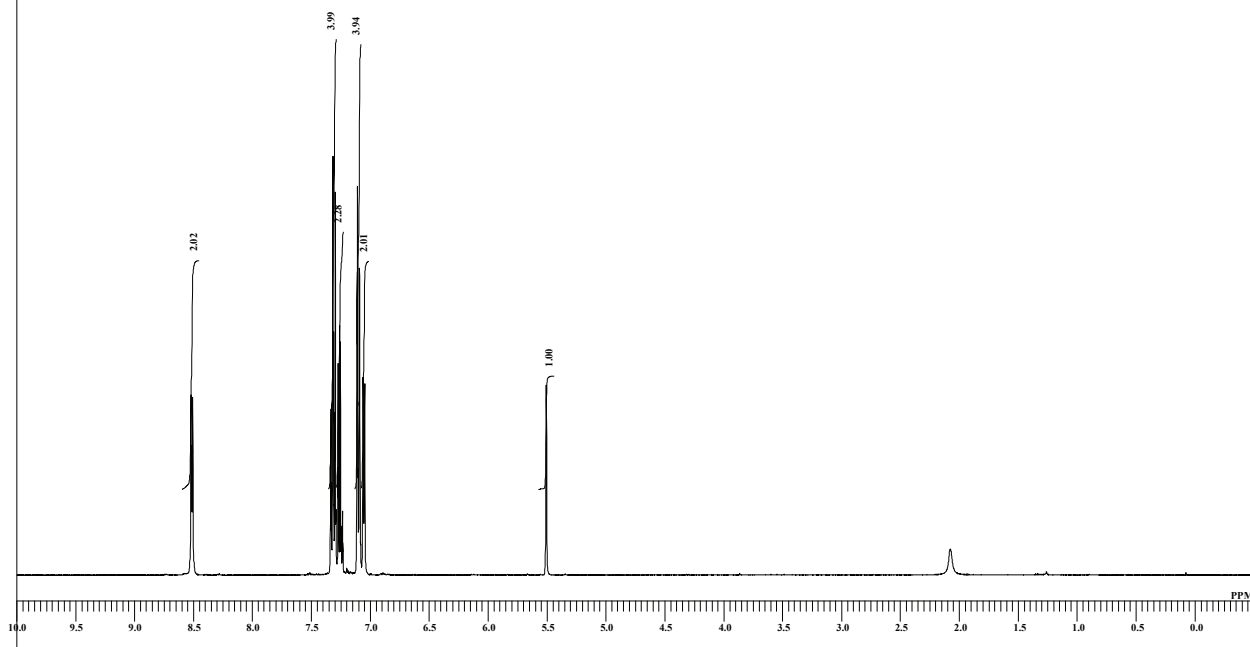

```

DFILE TH-13-57-f24-37-crystal-H.jdf
COMNT TH-13-57-f24-37-crystal
DATIM 21-09-2012 21:30:44
MENUF
OBNUC 1H
OFR 395.88 MHz
OBFQ 395.88 MHz
OBSE 6.28 KHz
OBFN 0.87 Hz
PWT 6.38 usec
DEAD 0.00 usec
PREDL 0.00000 msec
IWT 1.0000 sec
POINT 16384
SPO 16384
TIMES 8
DUMMY 1
FREQU 7422.80 Hz
FLT 30000 Hz
DELAY 16.68 usec
ACQTM 2.2073 sec
PD 5.0000 sec
SCANS 8
ADBT 16
RGAIN 40
BF 0.01 Hz
T1 0.00
T2 0.00
T3 100.00
T4 100.00
EXMOD single_pulse.ex2
IRNUC 1H
IFR 395.88 MHz
IRSE 6.28 kHz
IRFN 0.87 Hz
IRRP 115 usec
IRATN 79
DFILE TH-13-57-f24-37-crystal-H.jdf
SF
LKSE 13.20 KHz
LKFN 75.7 Hz
LKLE 0
LGAIN 0
LKPH 0
LKSG 0
CSPD 0 Hz
FILDC
FILDF
CTEMP 25.5 c
SLVNT CDCl3
EXREF 7.26 ppm
    
```

TH-13-57-f24-37-crystal

C:\Documents and Settings\PC-USER\My Documents\Data\Hoshikawa\13\TH-13-57-f24-37-crystal-C.jdf

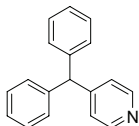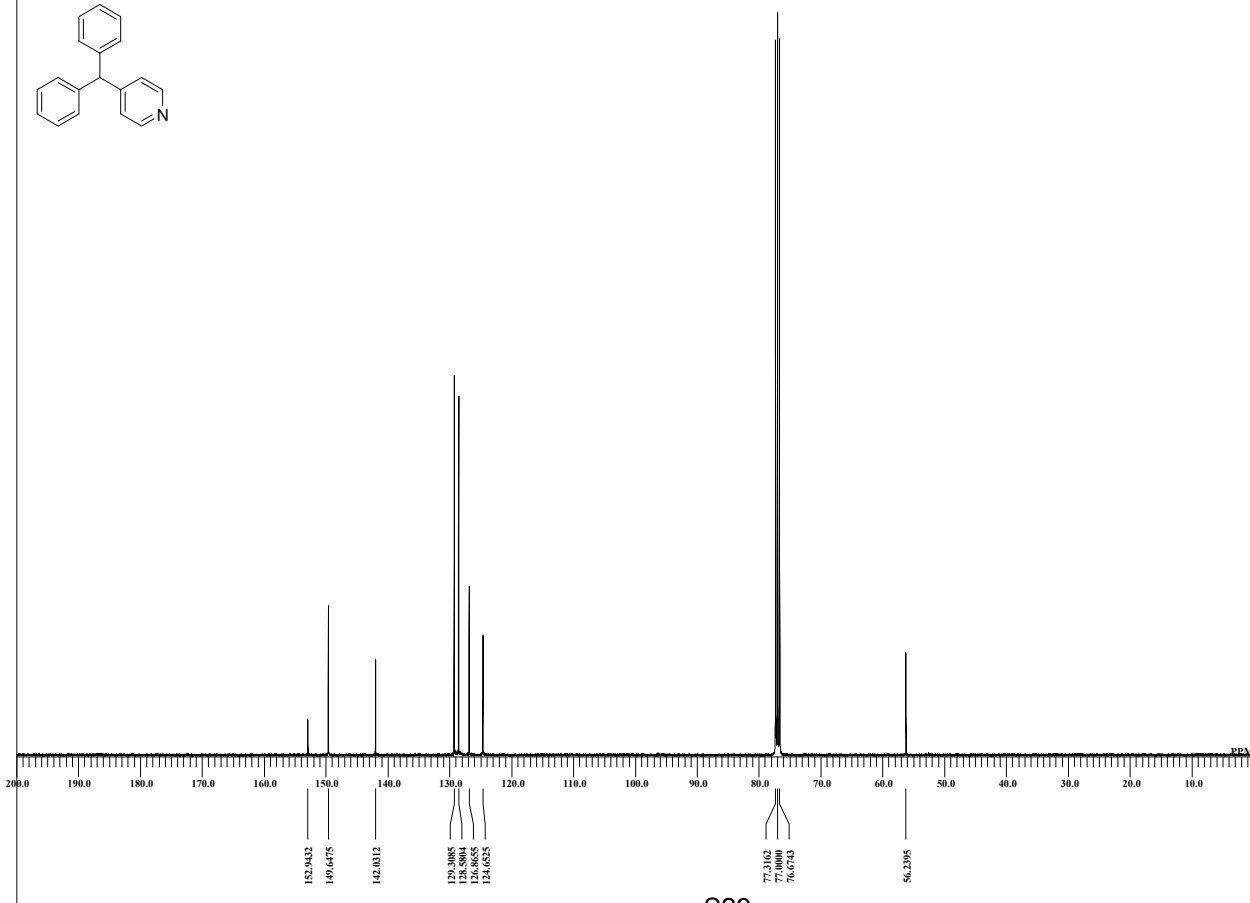

```

DFILE TH-13-57-f24-37-crystal-C.jdf
COMNT TH-13-57-f24-37-crystal
DATIM 22-09-2012 05:35:59
MENUF
OBNUC 13C
OFR 99.55 MHz
OBFQ 99.55 MHz
OBSE 5.13 KHz
OBFN 0.98 Hz
PWT 3.25 usec
DEAD 0.00 usec
PREDL 0.00000 msec
IWT 1.0000 sec
POINT 32768
SPO 32768
TIMES 4
DUMMY 4
FREQU 31250.00 Hz
FLT 125000 Hz
DELAY 20.50 usec
ACQTM 1.0486 sec
PD 8.0000 sec
SCANS 3200
ADBT 16
RGAIN 60
BF 1.00 Hz
T1 0.00
T2 0.00
T3 100.00
T4 100.00
EXMOD single_pulse_dec
IRNUC 1H
IFR 395.88 MHz
IRSE 6.28 kHz
IRFN 0.87 Hz
IRRP 115 usec
IRATN 79
DFILE TH-13-57-f24-37-crystal-C.jdf
SF
LKSE 13.20 KHz
LKFN 75.7 Hz
LKLE 0
LGAIN 0
LKPH 0
LKSG 0
CSPD 0 Hz
FILDC
FILDF
CTEMP 25.2 c
SLVNT CDCl3
EXREF 77.00 ppm
    
```

TH-13-61-f19-33

C:\Documents and Settings\PC-USER\My Documents\Data\Hoshikawa\13\TH-13-61-f19-33-1.jdf

3s

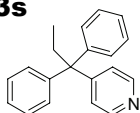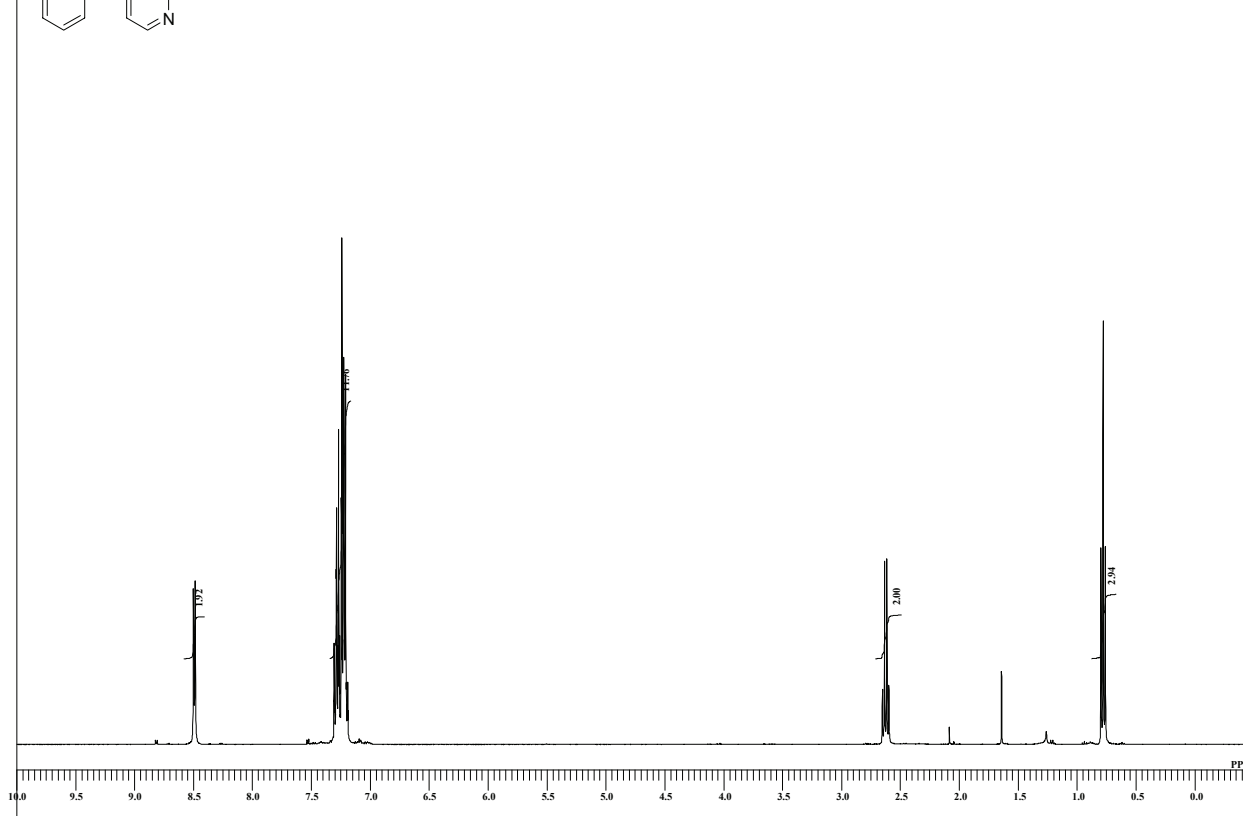

```

DFILE TH-13-61-f19-33-1.jdf
COMNT TH-13-61-f19-33
DATIM 26-09-2012 13:46:45
MENUF
OBNUC 1H
OFR 395.88 MHz
OBFREQ 395.88 MHz
OBSET 6.28 KHz
OBFIN 0.87 Hz
PWI 6.38 usec
DEADT 0.00 usec
PREDL 0.00000 msec
IWT 1.0000 sec
POINT 16384
SPO 16384
TIMES 8
DUMMY 1
FREQU 7422.80 Hz
FLT 30000 Hz
DELAY 16.68 usec
ACQTM 2.2073 sec
PD 5.0000 sec
SCANS 8
ADBIT 16
RGAIN 34
BF 0.01 Hz
T1 0.00
T2 0.00
T3 100.00
T4 100.00
EXMOD single_pulse.ex2
IRNUC 1H
IFR 395.88 MHz
IRSET 6.28 kHz
IRFIN 0.87 Hz
IRRPW 115 usec
IRATN 79
DFILE TH-13-61-f19-33-1.jdf
SF
LKSET 13.20 KHz
LKFIN 75.7 Hz
LKLEV 0
LGAIN 0
LKPBS 0
LKSIG 0
CSPED 0 Hz
FILDC
FILDF
CTEMP 24.3 c
SLVNT CDCl3
EXREF 7.26 ppm
    
```

TH-13-61-f19-33C

C:\Documents and Settings\PC-USER\My Documents\Data\Hoshikawa\13\TH-13-61-f19-33C-1.jdf

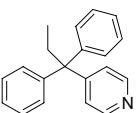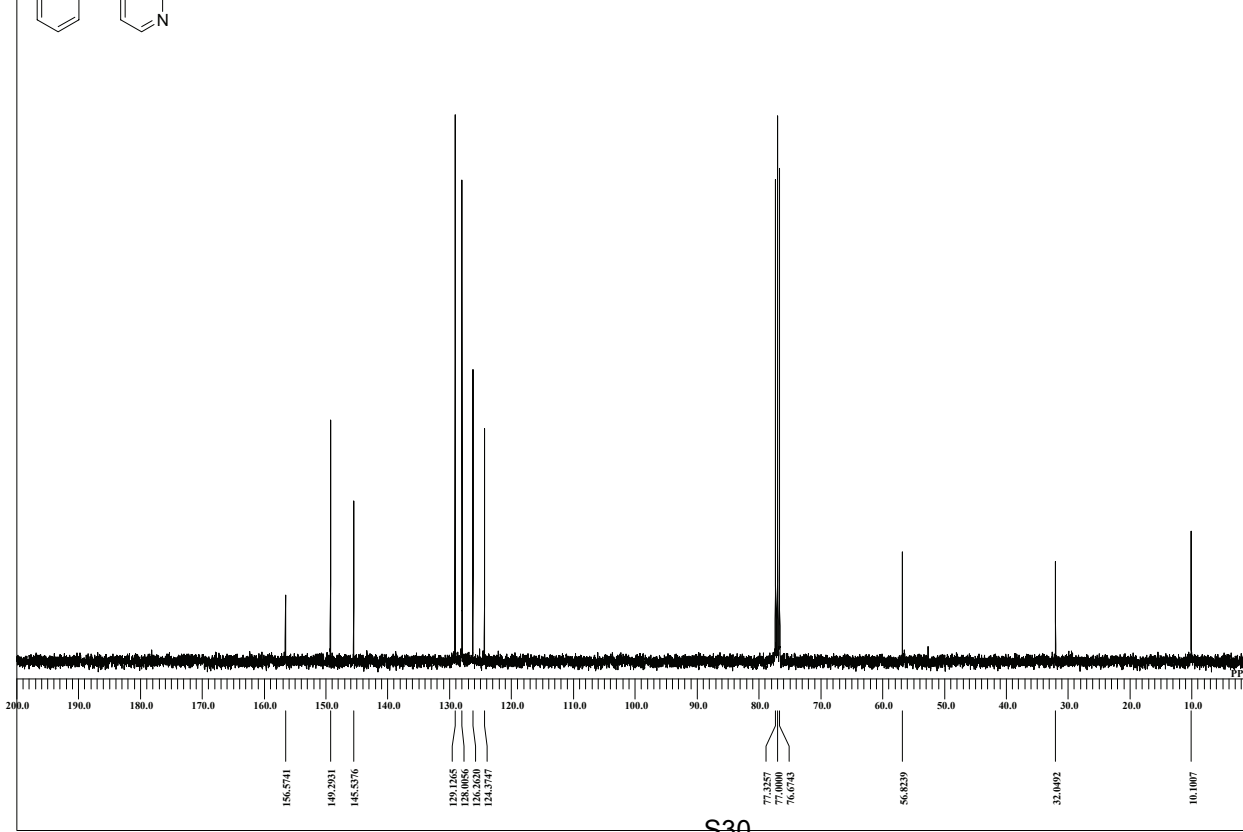

```

DFILE TH-13-61-f19-33C-1.jdf
COMNT TH-13-61-f19-33C
DATIM 26-09-2012 13:54:39
MENUF
OBNUC 13C
OFR 99.55 MHz
OBFREQ 99.55 MHz
OBSET 5.13 KHz
OBFIN 0.98 Hz
PWI 3.25 usec
DEADT 0.00 usec
PREDL 0.00000 msec
IWT 1.0000 sec
POINT 32768
SPO 32768
TIMES 42
DUMMY 4
FREQU 31250.00 Hz
FLT 125000 Hz
DELAY 20.50 usec
ACQTM 1.0486 sec
PD 8.0000 sec
SCANS 42
ADBIT 16
RGAIN 60
BF 1.00 Hz
T1 0.00
T2 0.00
T3 100.00
T4 100.00
EXMOD single_pulse_dec
IRNUC 1H
IFR 395.88 MHz
IRSET 6.28 kHz
IRFIN 0.87 Hz
IRRPW 115 usec
IRATN 79
DFILE TH-13-61-f19-33C-1.jdf
SF
LKSET 13.20 KHz
LKFIN 75.7 Hz
LKLEV 0
LGAIN 0
LKPBS 0
LKSIG 0
CSPED 0 Hz
FILDC
FILDF
CTEMP 24.6 c
SLVNT CDCl3
EXREF 77.00 ppm
    
```

TH-13-49-f20-33

C:\Documents and Settings\PC-USER\My Documents\Data\Hoshikawa\13\TH-13-49-f20-33-1.Lab

3t

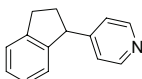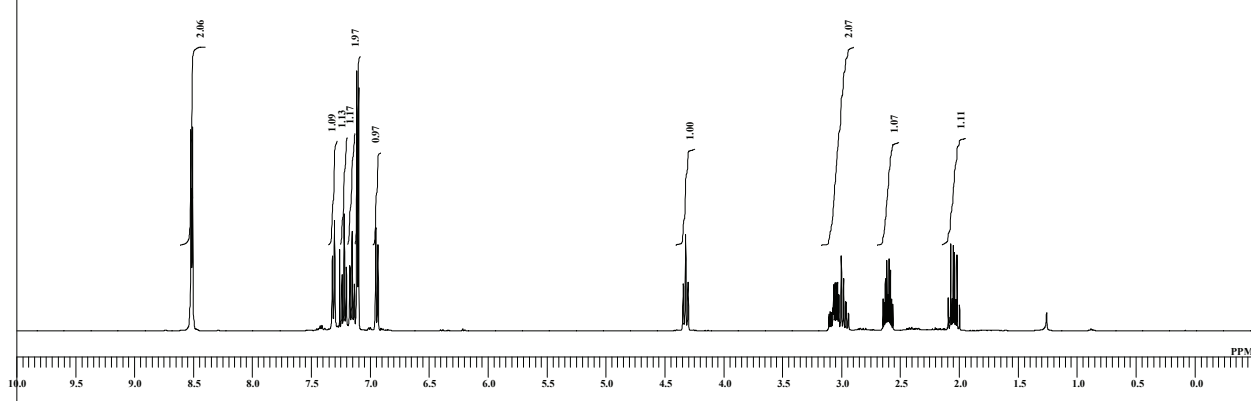

```

DFILE TH-13-49-f20-33-1.Lab
COMNT TH-13-49-f20-33
DATIM 18-09-2012 16:02:51
MENUF
OBNUC 1H
OFR 395.88 MHz
OBFQ 395.88 MHz
OBSE 6.28 KHz
OBFN 0.87 Hz
PWT 6.38 usec
DEAD 0.00 usec
PREDL 0.00000 msec
IWT 1.0000 sec
POINT 13107
SPO 13107
TIMES 8
DUMMY 1
FREQU 5938.15 Hz
FLT 30000 Hz
DELAY 16.68 usec
ACQTM 2.2073 sec
PD 5.0000 sec
SCANS 8
ADBT 16
RGAIN 34
BF 0.01 Hz
T1 0.00
T2 0.00
T3 100.00
T4 100.00
EXMOD single_pulse.ex2
IRNUC 1H
IFR 395.88 MHz
IRSE 6.28 kHz
IRFN 0.87 Hz
IRRP 115 usec
IRATN 79
DFILE TH-13-49-f20-33-1.Lab
SF
LKSE 13.20 KHz
LKFN 75.7 Hz
LKLE 0
LGAIN 0
LKPH 0
LKSG 0
CSPD 0 Hz
FILDC
FILDF
CTEMP 25.0 c
SLVNT CDCl3
EXREF 7.26 ppm
    
```

TH-13-49-f20-33C

C:\Documents and Settings\PC-USER\My Documents\Data\Hoshikawa\13\TH-13-49-f20-33C-1.Lab

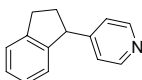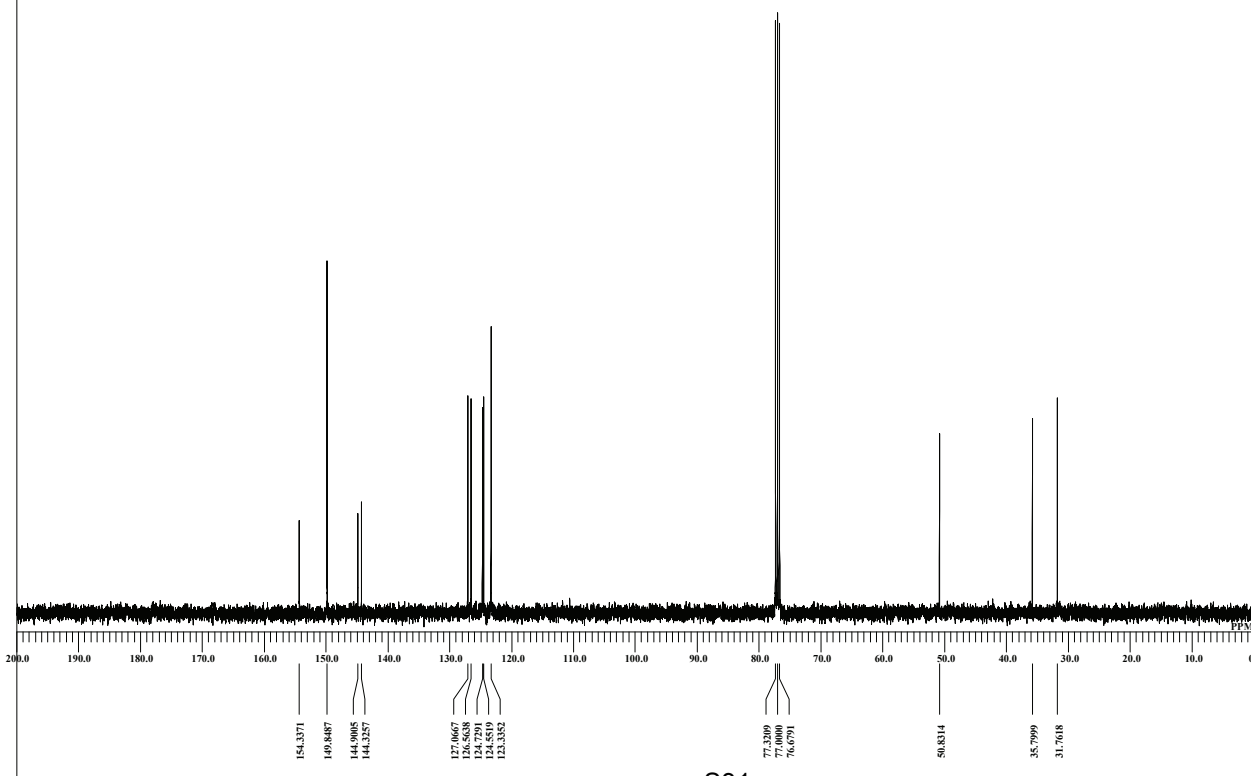

```

DFILE TH-13-49-f20-33C-1.Lab
COMNT TH-13-49-f20-33C
DATIM 18-09-2012 16:10:12
MENUF
OBNUC 13C
OFR 99.55 MHz
OBFQ 99.55 MHz
OBSE 5.13 KHz
OBFN 0.98 Hz
PWT 3.25 usec
DEAD 0.00 usec
PREDL 0.00000 msec
IWT 1.0000 sec
POINT 65536
SPO 65536
TIMES 34
DUMMY 4
FREQU 31250.00 Hz
FLT 125000 Hz
DELAY 20.50 usec
ACQTM 1.0486 sec
PD 8.0000 sec
SCANS 34
ADBT 16
RGAIN 60
BF 1.00 Hz
T1 0.00
T2 0.00
T3 100.00
T4 100.00
EXMOD single_pulse_dec
IRNUC 1H
IFR 395.88 MHz
IRSE 6.28 kHz
IRFN 0.87 Hz
IRRP 115 usec
IRATN 79
DFILE TH-13-49-f20-33C-1.Lab
SF
LKSE 13.20 KHz
LKFN 75.7 Hz
LKLE 0
LGAIN 0
LKPH 0
LKSG 0
CSPD 0 Hz
FILDC
FILDF
CTEMP 25.3 c
SLVNT CDCl3
EXREF 77.00 ppm
    
```

TH-13-45-f20-33

C:\Documents and Settings\PC-USER\My Documents\Data\Hoshikawa\13\TH-13-45-f20-33-1.jdf

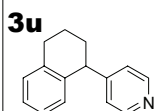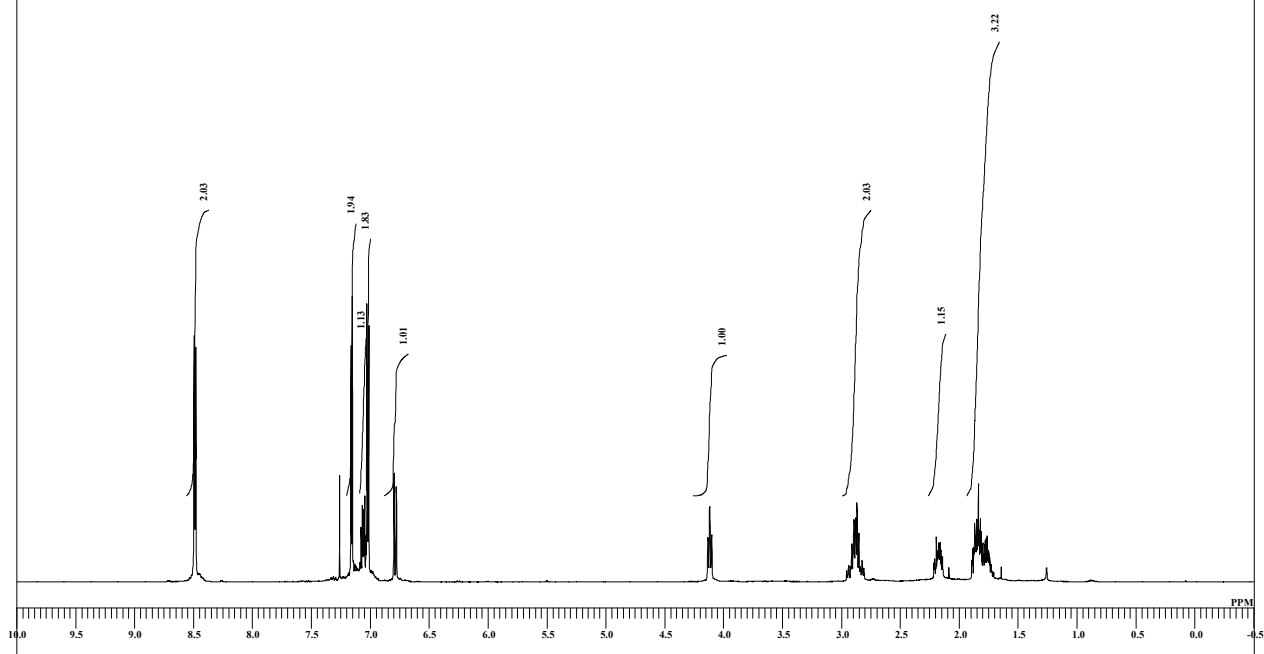

```

DFILE TH-13-45-f20-33-1.jdf
COMNT TH-13-45-f20-33
DATIM 07-09-2012 13:07:32
MENUF
MENUC
OBR 1H
OBRFQ 395.88 MHz
OBSET 6.28 KHz
OBFIN 0.87 Hz
PWI 6.38 usec
DEADT 0.00 usec
PREDL 0.00000 msec
IWT 1.0000 sec
POINT 16384
SPO 16384
TIMES 8
DUMMY 1
FREQU 7422.80 Hz
FLT 30000 Hz
DELAY 16.68 usec
ACQTM 2.2073 sec
PD 5.0000 sec
SCANS 8
ADBIT 16
RGAIN 34
BF 0.01 Hz
T1 0.00
T2 0.00
T3 90.00
T4 100.00
EXMOD single_pulse.ex2
IRNUC 1H
IFR 395.88 MHz
IRSET 6.28 kHz
IRFIN 0.87 Hz
IRRPW 115 usec
IRATN 79
DFILE TH-13-45-f20-33-1.jdf
SF
LKSET 13.20 KHz
LKFIN 75.7 Hz
LKLEV 0
LGAIN 0
LKPHS 0
LKSG 0
CSPED 0 Hz
FILDC
FILDF
CTEMP 24.4 c
SLVNT CDCl3
EXREF 7.26 ppm
    
```

TH-13-45-f20-33C

C:\Documents and Settings\PC-USER\My Documents\Data\Hoshikawa\13\TH-13-45-f20-33C-1.jdf

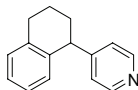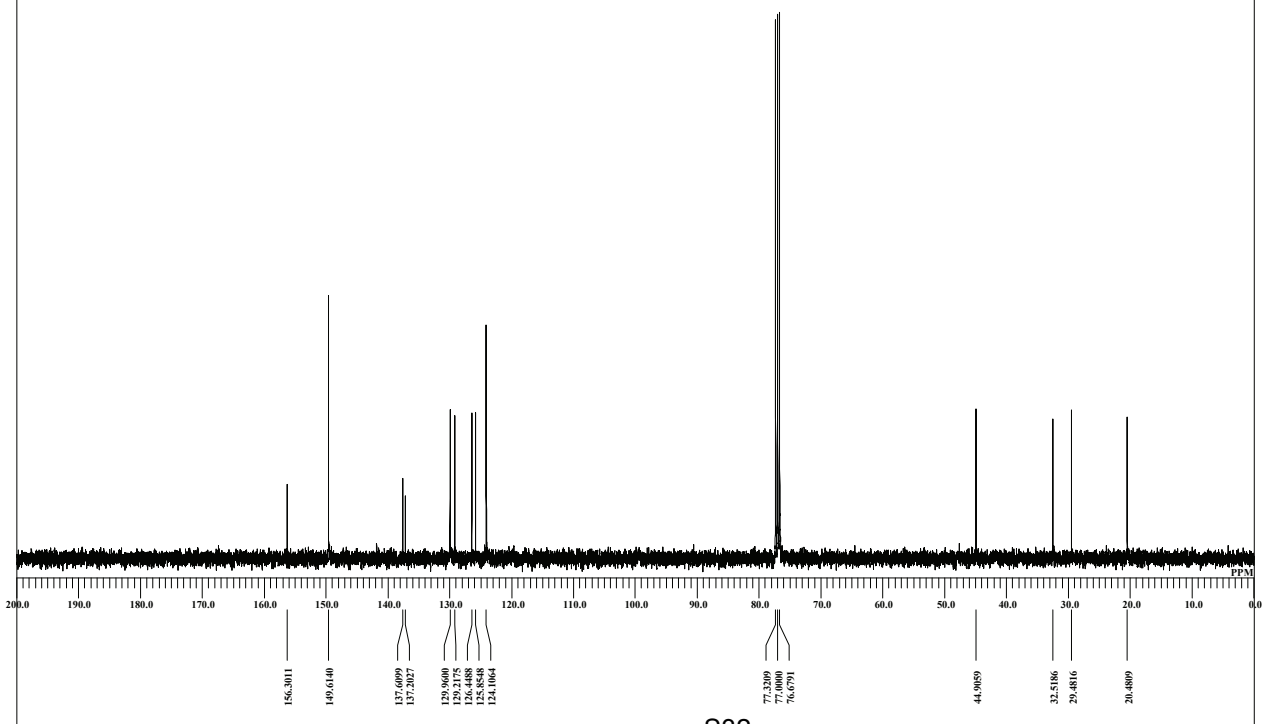

```

DFILE TH-13-45-f20-33C-1.jdf
COMNT TH-13-45-f20-33C
DATIM 07-09-2012 13:14:25
MENUF
MENUC
OBR 13C
OBRFQ 99.55 MHz
OBSET 5.13 KHz
OBFIN 0.98 Hz
PWI 3.25 usec
DEADT 0.00 usec
PREDL 0.00000 msec
IWT 1.0000 sec
POINT 65536
SPO 65536
TIMES 34
DUMMY 4
FREQU 31250.00 Hz
FLT 125000 Hz
DELAY 20.20 usec
ACQTM 1.0486 sec
PD 8.0000 sec
SCANS 34
ADBIT 16
RGAIN 60
BF 1.00 Hz
T1 0.00
T2 0.00
T3 90.00
T4 100.00
EXMOD single_pulse_dec
IRNUC 1H
IFR 395.88 MHz
IRSET 6.28 kHz
IRFIN 0.87 Hz
IRRPW 115 usec
IRATN 79
DFILE TH-13-45-f20-33C-1.jdf
SF
LKSET 13.20 KHz
LKFIN 75.7 Hz
LKLEV 0
LGAIN 0
LKPHS 0
LKSG 0
CSPED 0 Hz
FILDC
FILDF
CTEMP 24.6 c
SLVNT CDCl3
EXREF 77.00 ppm
    
```



TH-13-89-f32-35

C:\Documents and Settings\PC-USER\My Documents\Data\Hoshikawa\13\TH-13-89-f32-35-1.Lab

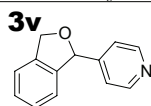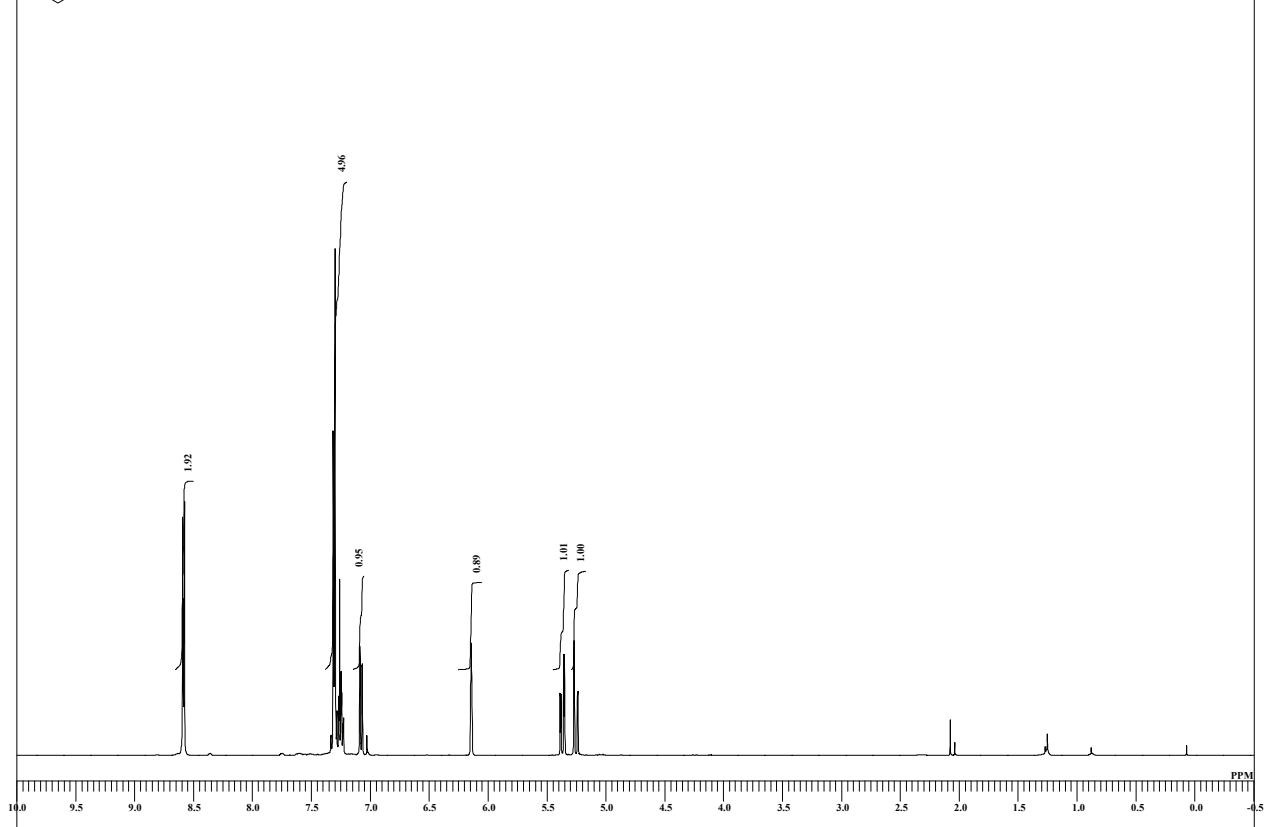

```

DFILE TH-13-89-f32-35-Lab
COMNT TH-13-89-f32-35
DATIM 05-10-2012 16:25:28
MENUF
OBNUC 1H
OFR 395.88 MHz
OBFQ 395.88 MHz
OBSE 6.28 KHz
OBFN 0.87 Hz
PWI 6.38 usec
DEAD 0.00 usec
PREDL 0.00000 msec
IWT 1.0000 sec
POINT 16384
SPO 16384
TIMES 8
DUMMY 1
FREQU 7422.80 Hz
FLT 30000 Hz
DELAY 16.68 usec
ACQTM 2.2073 sec
PD 5.0000 sec
SCANS 8
ADBT 16
RGAIN 38
BF 0.01 Hz
T1 0.00
T2 0.00
T3 100.00
T4 100.00
EXMOD single_pulse.ex2
IRNUC 1H
IFR 395.88 MHz
IRSE 6.28 kHz
IRFN 0.87 Hz
IRPW 147 usec
IRATN 79
DFILE TH-13-89-f32-35-Lab
SF
LKSE 13.20 KHz
LKFN 75.7 Hz
LKLE 0
LGAIN 0
LKPH 0
LKSG 0
CSPE 0 Hz
FILDC
FILDF
CTEMP 24.3 c
SLVNT CDCl3
EXREF 7.26 ppm
    
```

TH-13-89-f32-35C

C:\Documents and Settings\PC-USER\My Documents\Data\Hoshikawa\13\TH-13-89-f32-35C-1.Lab

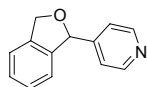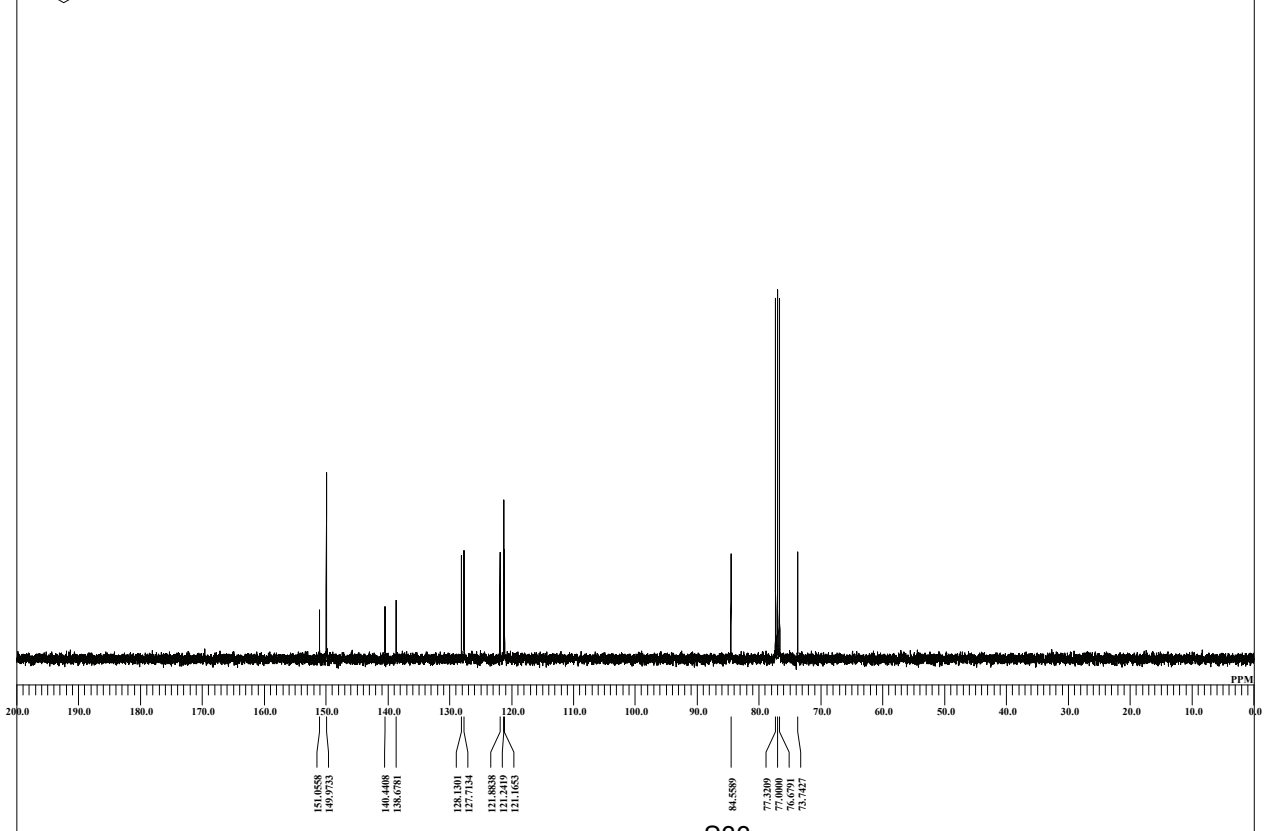

```

DFILE TH-13-89-f32-35C-1.Lab
COMNT TH-13-89-f32-35C
DATIM 05-10-2012 16:32:11
MENUF
OBNUC 13C
OFR 99.55 MHz
OBFQ 99.55 MHz
OBSE 5.13 KHz
OBFN 0.98 Hz
PWI 3.25 usec
DEAD 0.00 usec
PREDL 0.00000 msec
IWT 1.0000 sec
POINT 65536
SPO 65536
TIMES 34
DUMMY 4
FREQU 31250.00 Hz
FLT 125000 Hz
DELAY 20.50 usec
ACQTM 1.0486 sec
PD 8.0000 sec
SCANS 34
ADBT 16
RGAIN 60
BF 1.00 Hz
T1 0.00
T2 0.00
T3 100.00
T4 100.00
EXMOD single_pulse_dec
IRNUC 1H
IFR 395.88 MHz
IRSE 6.28 kHz
IRFN 0.87 Hz
IRPW 115 usec
IRATN 79
DFILE TH-13-89-f32-35C-1.Lab
SF
LKSE 13.20 KHz
LKFN 75.7 Hz
LKLE 0
LGAIN 0
LKPH 0
LKSG 0
CSPE 0 Hz
FILDC
FILDF
CTEMP 24.5 c
SLVNT CDCl3
EXREF 77.00 ppm
    
```

TH-13-117-PTLC-major-H

C:\Documents and Settings\PC-USER\My Documents\Data\Hoshikawa\13\13-117\TH-13-117-PTLC-major-H-1.a

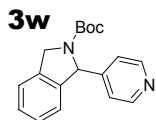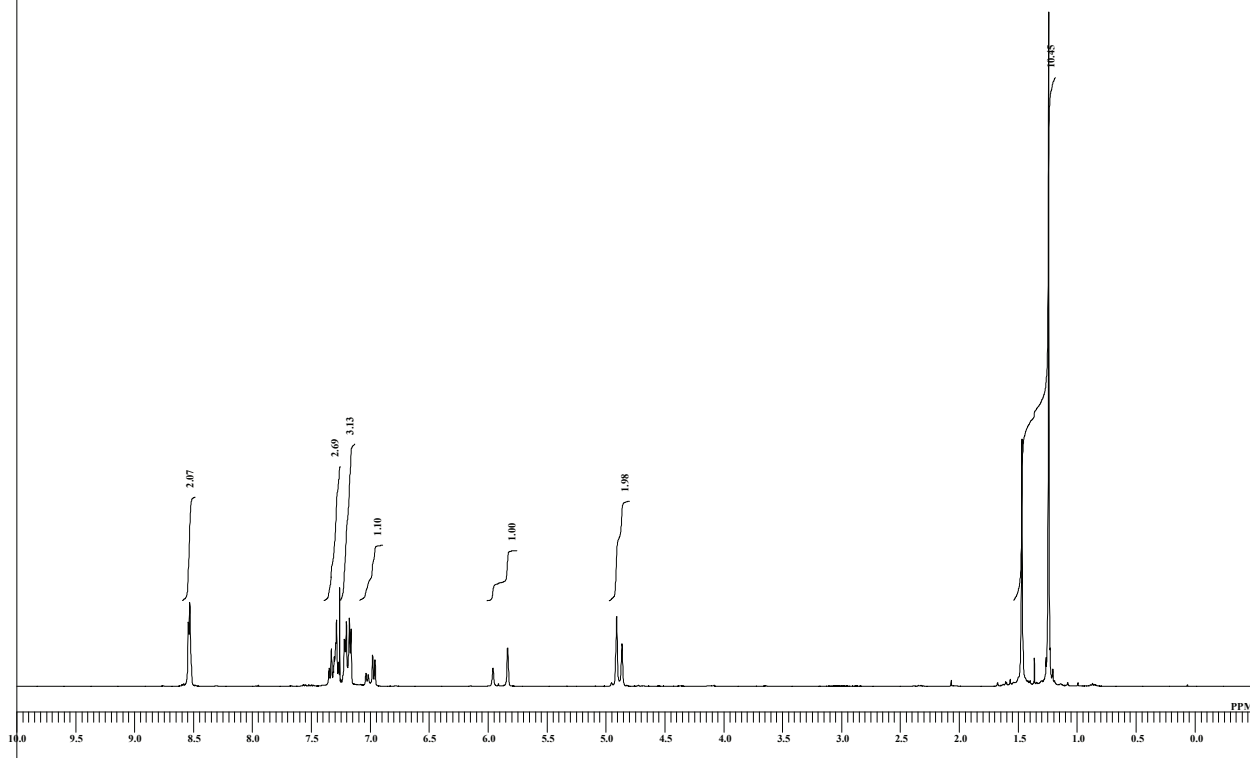

|       |                            |
|-------|----------------------------|
| DFILE | TH-13-117-PTLC-major-H-1.a |
| COMNT | TH-13-117-PTLC-major-H     |
| DATIM | 19-10-2012 17:15:27        |
| MENUF |                            |
| OBNUC | 1H                         |
| OFR   | 395.88 MHz                 |
| OBFRQ | 395.88 MHz                 |
| OBSET | 6.28 KHz                   |
| OBFIN | 0.87 Hz                    |
| PWT   | 6.38 usec                  |
| DEADT | 0.00 usec                  |
| PREDL | 0.00000 msec               |
| IWT   | 1.0000 sec                 |
| POINT | 13107                      |
| SPO   | 13107                      |
| TIMES | 8                          |
| DUMMY | 1                          |
| FREQU | 5938.15 Hz                 |
| FLT   | 30000 Hz                   |
| DELAY | 16.68 usec                 |
| ACQTM | 2.2073 sec                 |
| PD    | 5.0000 sec                 |
| SCANS | 8                          |
| ADBT  | 16                         |
| RGAIN | 30                         |
| BF    | 0.01 Hz                    |
| T1    | 0.00                       |
| T2    | 0.00                       |
| T3    | 90.00                      |
| T4    | 100.00                     |
| EXMOD | single_pulse.ex2           |
| IRNUC | 1H                         |
| IFR   | 395.88 MHz                 |
| IRSET | 6.28 kHz                   |
| IRFIN | 0.87 Hz                    |
| IRRPW | 115 usec                   |
| IRATN | 79                         |
| DFILE | TH-13-117-PTLC-major-H-1.a |
| SF    |                            |
| LKSET | 13.20 KHz                  |
| LKFIN | 75.7 Hz                    |
| LKLEV | 0                          |
| LGAIN | 0                          |
| LKPHS | 0                          |
| LKSG  | 0                          |
| CSPED | 0 Hz                       |
| FILDC |                            |
| FILDF |                            |
| CTEMP | 23.7 c                     |
| SLVNT | CDCl3                      |
| EXREF | 7.26 ppm                   |

TH-13-117-PTLC-major-C

C:\Documents and Settings\PC-USER\My Documents\Data\Hoshikawa\13\13-117\TH-13-117-PTLC-major-C-1.a

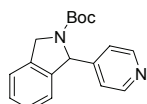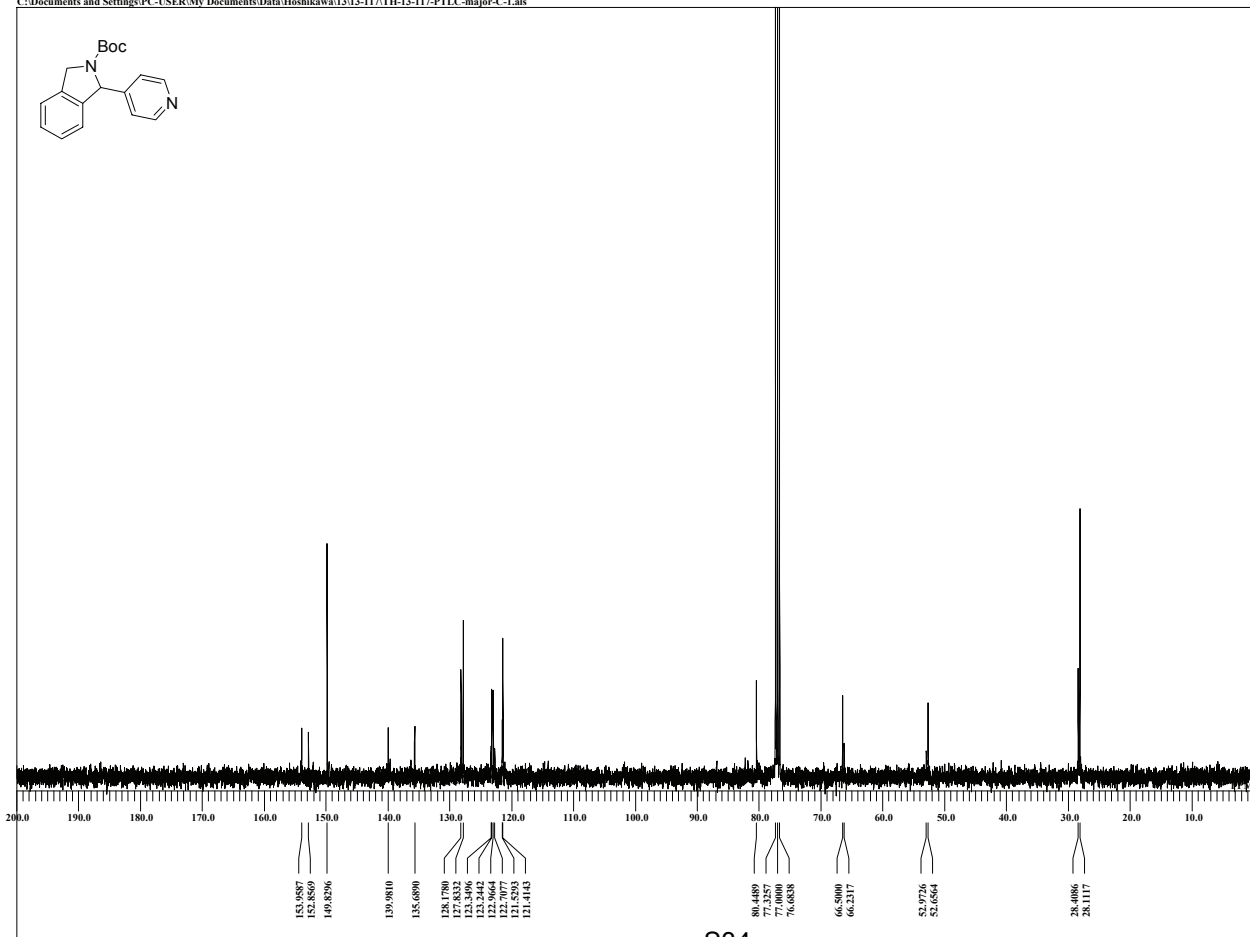

|       |                            |
|-------|----------------------------|
| DFILE | TH-13-117-PTLC-major-C-1.a |
| COMNT | TH-13-117-PTLC-major-C     |
| DATIM | 19-10-2012 17:26:15        |
| MENUF |                            |
| OBNUC | 13C                        |
| OFR   | 99.55 MHz                  |
| OBFRQ | 99.55 MHz                  |
| OBSET | 5.13 KHz                   |
| OBFIN | 0.98 Hz                    |
| PWT   | 3.25 usec                  |
| DEADT | 0.00 usec                  |
| PREDL | 0.00000 msec               |
| IWT   | 1.0000 sec                 |
| POINT | 26214                      |
| SPO   | 26214                      |
| TIMES | 62                         |
| DUMMY | 4                          |
| FREQU | 24999.62 Hz                |
| FLT   | 125000 Hz                  |
| DELAY | 20.50 usec                 |
| ACQTM | 1.0486 sec                 |
| PD    | 8.0000 sec                 |
| SCANS | 62                         |
| ADBT  | 16                         |
| RGAIN | 60                         |
| BF    | 1.00 Hz                    |
| T1    | 0.00                       |
| T2    | 0.00                       |
| T3    | 90.00                      |
| T4    | 100.00                     |
| EXMOD | single_pulse_dec           |
| IRNUC | 1H                         |
| IFR   | 395.88 MHz                 |
| IRSET | 6.28 kHz                   |
| IRFIN | 0.87 Hz                    |
| IRRPW | 115 usec                   |
| IRATN | 79                         |
| DFILE | TH-13-117-PTLC-major-C-1.a |
| SF    |                            |
| LKSET | 13.20 KHz                  |
| LKFIN | 75.7 Hz                    |
| LKLEV | 0                          |
| LGAIN | 0                          |
| LKPHS | 0                          |
| LKSG  | 0                          |
| CSPED | 0 Hz                       |
| FILDC |                            |
| FILDF |                            |
| CTEMP | 24.0 c                     |
| SLVNT | CDCl3                      |
| EXREF | 77.00 ppm                  |

TH-13-109-f57-64H

C:\Documents and Settings\PC-USER\My Documents\Data\Hoshikawa\13\13-109\TH-13-109-f57-64H-1.lals

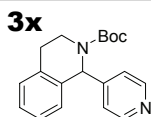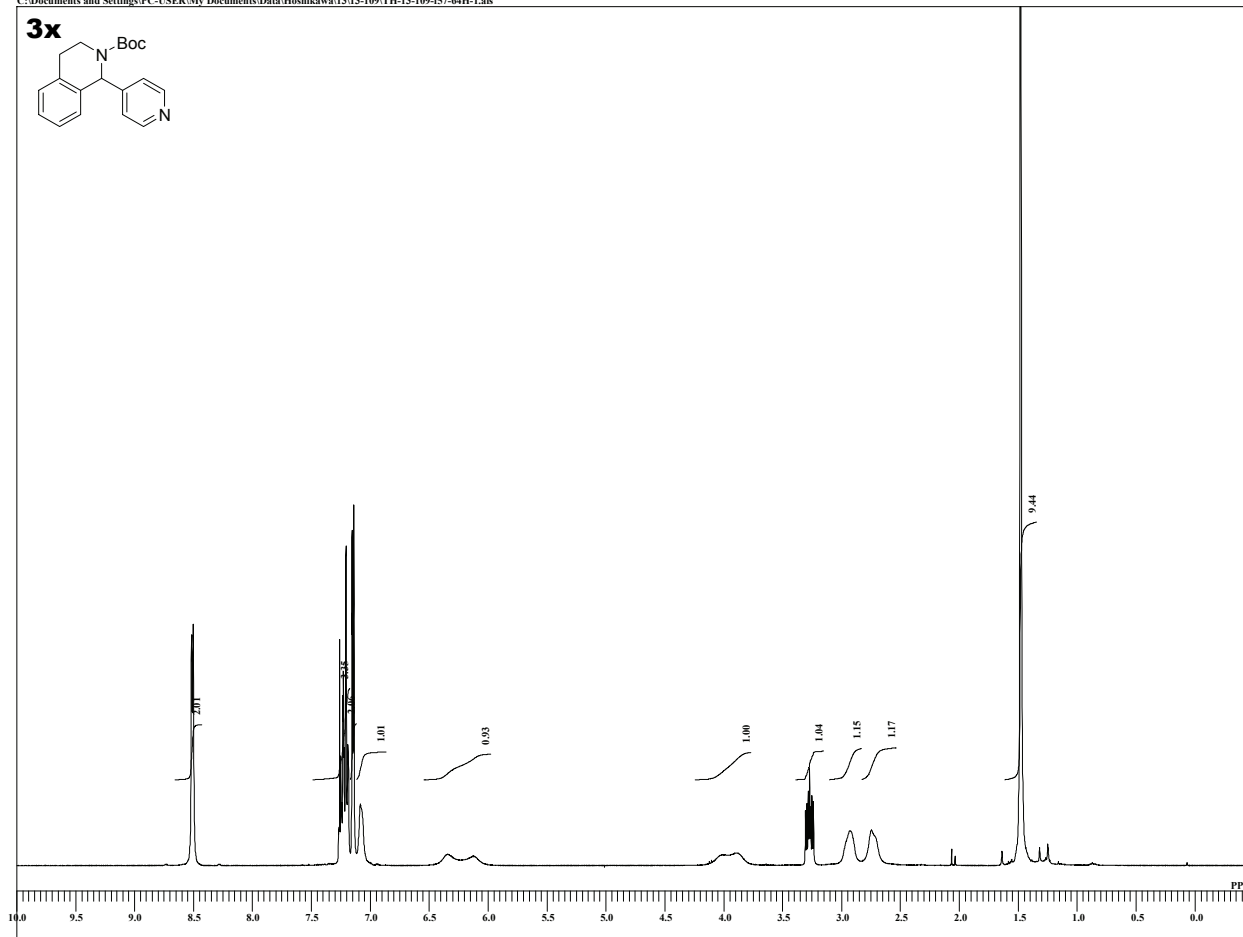

```

DFILE TH-13-109-f57-64H-1.lals
COMNT TH-13-109-f57-64H
DATIM 17-10-2012 20:46:05
MENUF
OBNUC 1H
OFR 395.88 MHz
OBFRO 395.88 MHz
OBSET 6.28 KHz
OBFIN 0.87 Hz
PWI 6.38 usec
DEADT 0.00 usec
PREDL 0.00000 msec
IWT 1.0000 sec
POINT 13107
SPO 13107
TIMES 8
DUMMY 1
FREQU 5938.15 Hz
FLT 30000 Hz
DELAY 16.68 usec
ACQTM 2.2073 sec
PD 5.0000 sec
SCANS 8
ADBIT 16
RGAIN 30
BF 0.01 Hz
T1 0.00
T2 0.00
T3 90.00
T4 100.00
EXMOD single_pulse.ex2
IRNUC 1H
IFR 395.88 MHz
IRSET 6.28 kHz
IRFIN 0.87 Hz
IRRPW 115 usec
IRATN 79
DFILE TH-13-109-f57-64H-1.lals
SF
LKSET 13.20 KHz
LKFIN 75.7 Hz
LKLEV 0
LGAIN 0
LKPHS 0
LKSG 0
CSPED 0 Hz
FILDC
FILDF
CTEMP 23.6 c
SLVNT CDCl3
EXREF 7.26 ppm
    
```

TH-13-109-f57-64C

C:\Documents and Settings\PC-USER\My Documents\Data\Hoshikawa\13\13-109\TH-13-109-f57-64C-1.lals

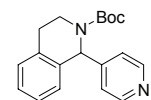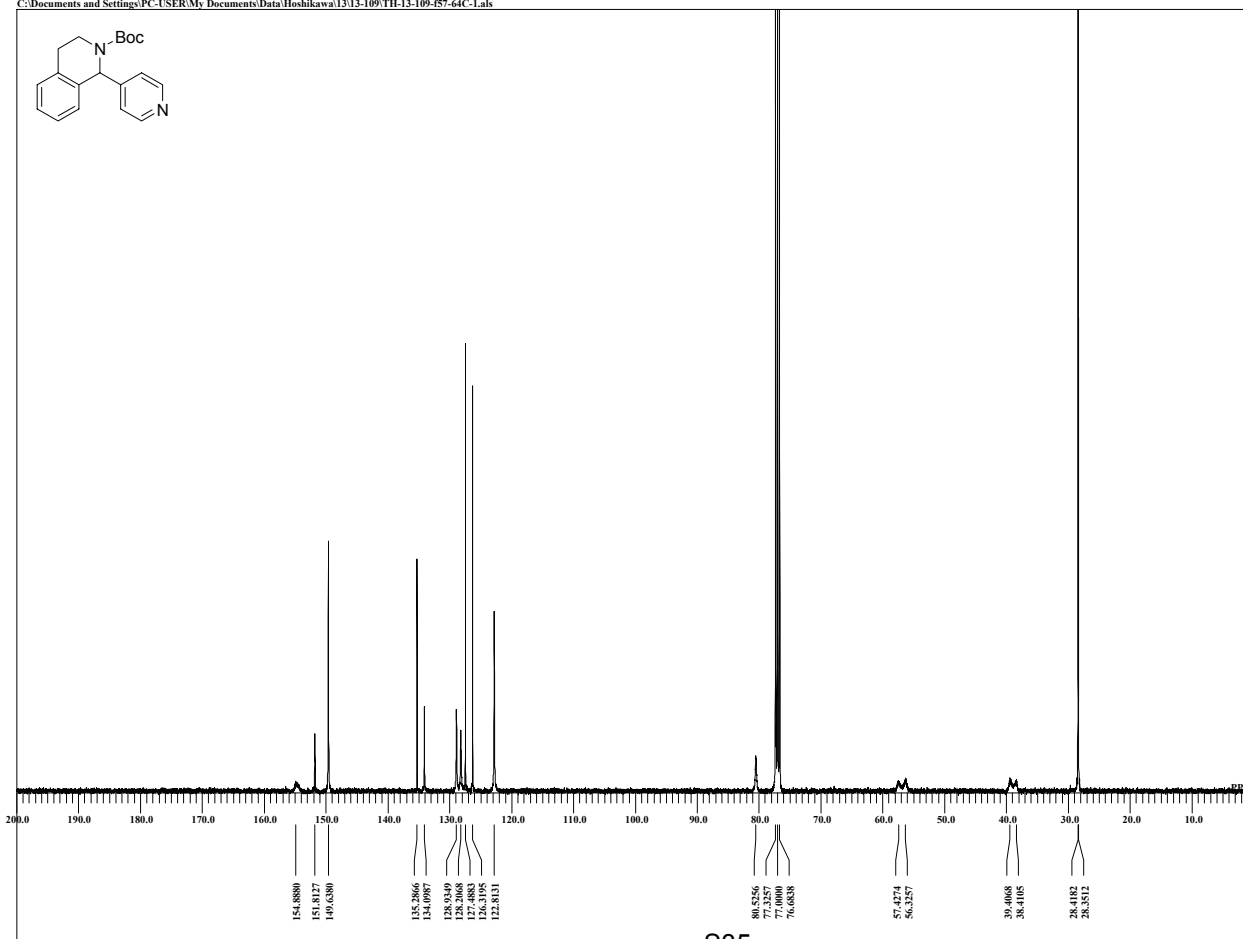

```

DFILE TH-13-109-f57-64C-1.lals
COMNT TH-13-109-f57-64C
DATIM 18-10-2012 05:23:45
MENUF
OBNUC 13C
OFR 99.55 MHz
OBFRO 99.55 MHz
OBSET 5.13 KHz
OBFIN 0.98 Hz
PWI 3.25 usec
DEADT 0.00 usec
PREDL 0.00000 msec
IWT 1.0000 sec
POINT 26214
SPO 26214
TIMES 4
DUMMY 4
FREQU 24999.62 Hz
FLT 125000 Hz
DELAY 20.50 usec
ACQTM 1.0486 sec
PD 8.0000 sec
SCANS 3200
ADBIT 16
RGAIN 60
BF 1.00 Hz
T1 0.00
T2 0.00
T3 90.00
T4 100.00
EXMOD single_pulse_dec
IRNUC 1H
IFR 395.88 MHz
IRSET 6.28 kHz
IRFIN 0.87 Hz
IRRPW 115 usec
IRATN 79
DFILE TH-13-109-f57-64C-1.lals
SF
LKSET 13.20 KHz
LKFIN 75.7 Hz
LKLEV 0
LGAIN 0
LKPHS 0
LKSG 0
CSPED 0 Hz
FILDC
FILDF
CTEMP 23.8 c
SLVNT CDCl3
EXREF 77.00 ppm
    
```

TH-13-127-f59-67

C:\Documents and Settings\PC-USER\My Documents\Data\Hoshikawa\13\TH-13-127-f59-67-1.jdf

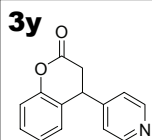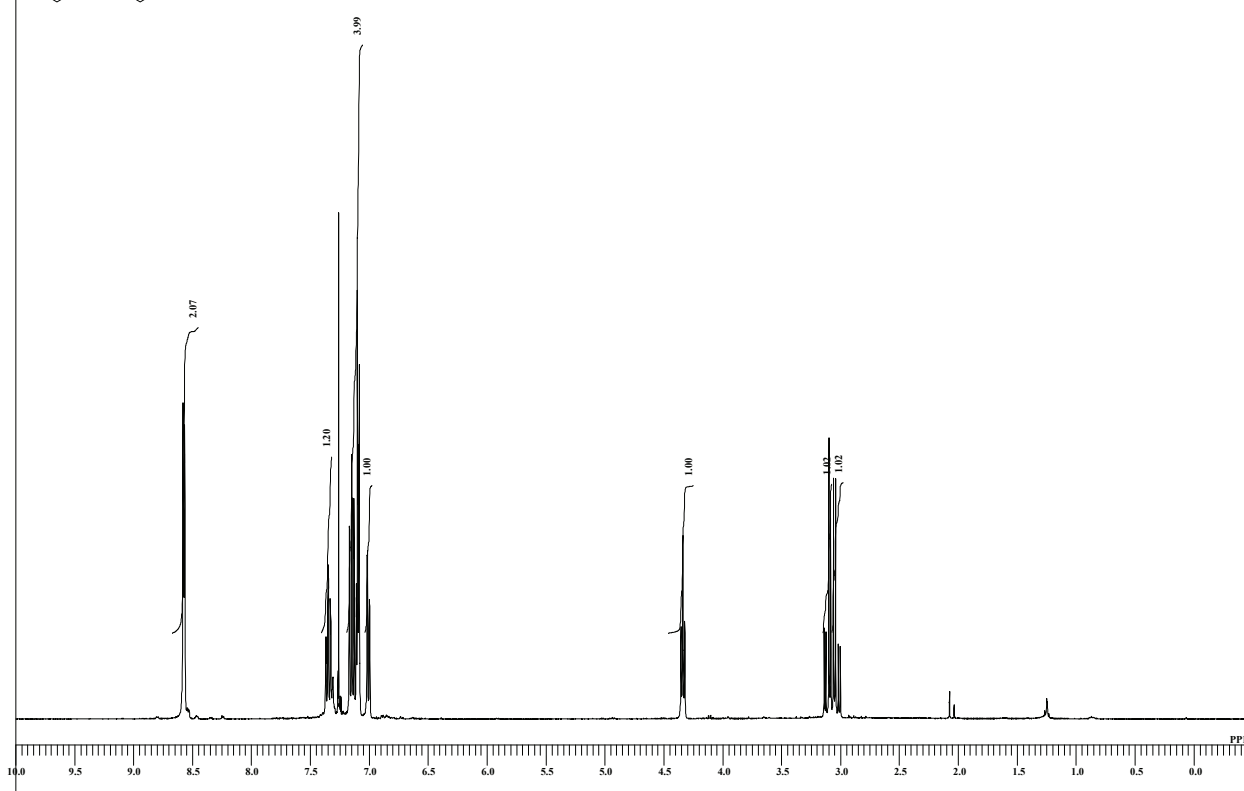

```

DFILE TH-13-127-f59-67-1.jdf
COMNT TH-13-127-f59-67
DATIM 24-10-2012 09:18:58
MENUF
MENUC
OBNUC 1H
OFR 395.88 MHz
OBFQ 395.88 MHz
OBSE 6.28 KHz
OBFN 0.87 Hz
PWI 6.38 usec
DEAD 0.00 usec
PREDL 0.00000 msec
IWT 1.0000 sec
POINT 16384
SPO 16384
TIMES 8
DUMMY 1
FREQU 7422.80 Hz
FLT 30000 Hz
DELAY 16.68 usec
ACQTM 2.2073 sec
PD 5.0000 sec
SCANS 8
ADBT 16
RGAIN 38
BF 0.01 Hz
T1 0.00
T2 0.00
T3 90.00
T4 100.00
EXMOD single_pulse.ex2
IRNUC 1H
IFR 395.88 MHz
IRSE 6.28 kHz
IRFN 0.87 Hz
IRRP 115 usec
IRATN 79
DFILE TH-13-127-f59-67-1.jdf
SF
LKSE 13.20 KHz
LKFN 75.7 Hz
LKLE 0
LGAIN 0
LKPBS 0
LKSG 0
CSPED 0 Hz
FILDC
FILDF 22.9 c
CTEMP
SLVNT CDCl3
EXREF 7.26 ppm
    
```

TH-13-127-f59-67C

C:\Documents and Settings\PC-USER\My Documents\Data\Hoshikawa\13\TH-13-127-f59-67C-1.jdf

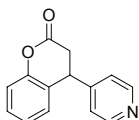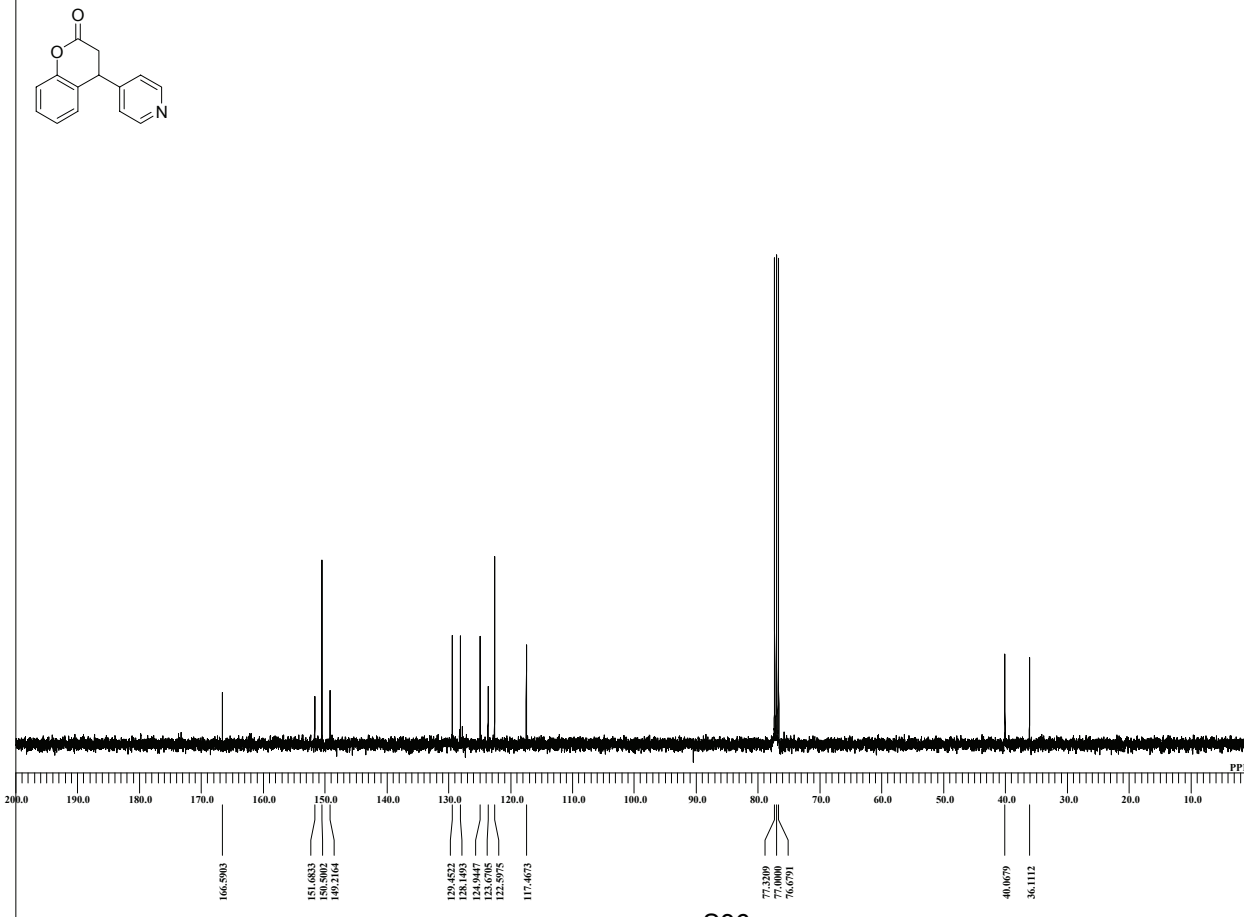

```

DFILE TH-13-127-f59-67C-1.jdf
COMNT TH-13-127-f59-67C
DATIM 24-10-2012 09:25:03
MENUF
MENUC
OBNUC 13C
OFR 99.55 MHz
OBFQ 99.55 MHz
OBSE 5.13 KHz
OBFN 0.98 Hz
PWI 3.25 usec
DEAD 0.00 usec
PREDL 0.00000 msec
IWT 1.0000 sec
POINT 65536
SPO 65536
TIMES 42
DUMMY 4
FREQU 31250.00 Hz
FLT 125000 Hz
DELAY 20.50 usec
ACQTM 1.0486 sec
PD 6.0000 sec
SCANS 42
ADBT 16
RGAIN 60
BF 1.00 Hz
T1 0.00
T2 0.00
T3 90.00
T4 100.00
EXMOD single_pulse_dec
IRNUC 1H
IFR 395.88 MHz
IRSE 6.28 kHz
IRFN 0.87 Hz
IRRP 115 usec
IRATN 79
DFILE TH-13-127-f59-67C-1.jdf
SF
LKSE 13.20 KHz
LKFN 75.7 Hz
LKLE 0
LGAIN 0
LKPBS 0
LKSG 0
CSPED 0 Hz
FILDC
FILDF 23.2 c
CTEMP
SLVNT CDCl3
EXREF 77.00 ppm
    
```

TH-13-167-f44-54-2nd

C:\Documents and Settings\PC-USER\My Documents\Data\Hoshikawa\13\13-167\TH-13-167-f44-54-2nd-1.als

3z

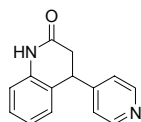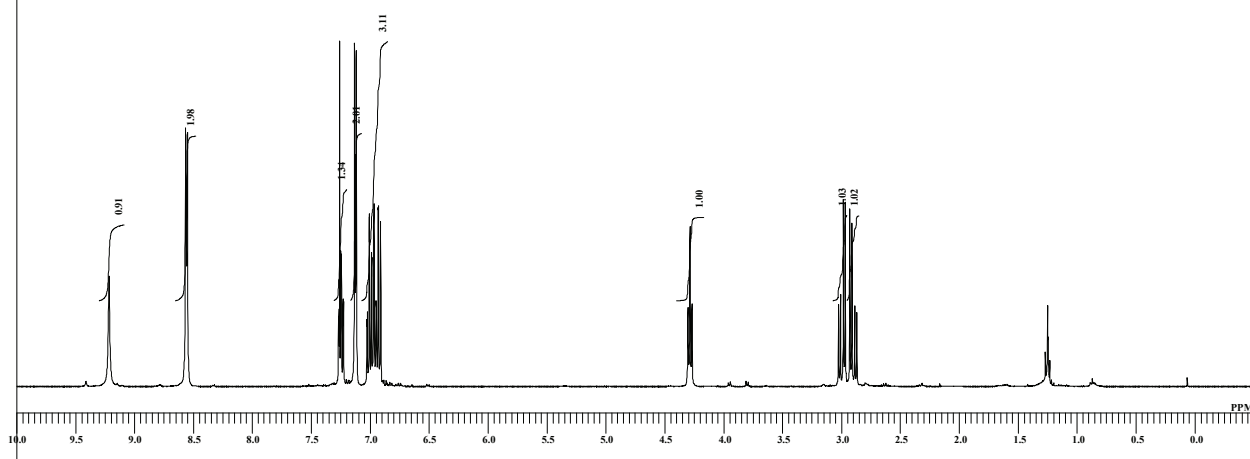

```

DFILE TH-13-167-f44-54-2nd-1.als
COMNT TH-13-167-f44-54-2nd
DATIM 16-11-2012 20:28:03
MENUF
MENUMF
OBNUC 1H
OFR 395.88 MHz
OBFREQ 395.88 MHz
OBSET 6.28 KHz
OBFIN 0.87 Hz
PWI 6.38 usec
DEADT 0.00 usec
PREDL 0.00000 msec
IWT 1.0000 sec
POINT 13107
SPO 13107
TIMES 8
DUMMY 1
FREQU 5938.15 Hz
FLT 30000 Hz
DELAY 16.68 usec
ACQTM 2.2073 sec
PD 5.0000 sec
SCANS 8
ADBT 16
RGAIN 38
BF 0.01 Hz
T1 0.00
T2 0.00
T3 90.00
T4 100.00
EXMOD single_pulse.ex2
IRNUC 1H
IFR 395.88 MHz
IRSET 6.28 kHz
IRFIN 0.87 Hz
IRRPW 147 usec
IRATN 79
DFILE TH-13-167-f44-54-2nd-1.als
SF
LKSET 13.20 KHz
LKFIN 75.7 Hz
LKLEV 0
LGAIN 0
LKPBS 0
LKSG 0
CSPED 0 Hz
FILDC
FILDF
CTEMP 22.9 c
SLVNT CDCl3
EXREF 7.26 ppm
    
```

TH-13-167-f44-54C

C:\Documents and Settings\PC-USER\My Documents\Data\Hoshikawa\13\13-167\TH-13-167-f44-54C-1.jdf

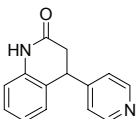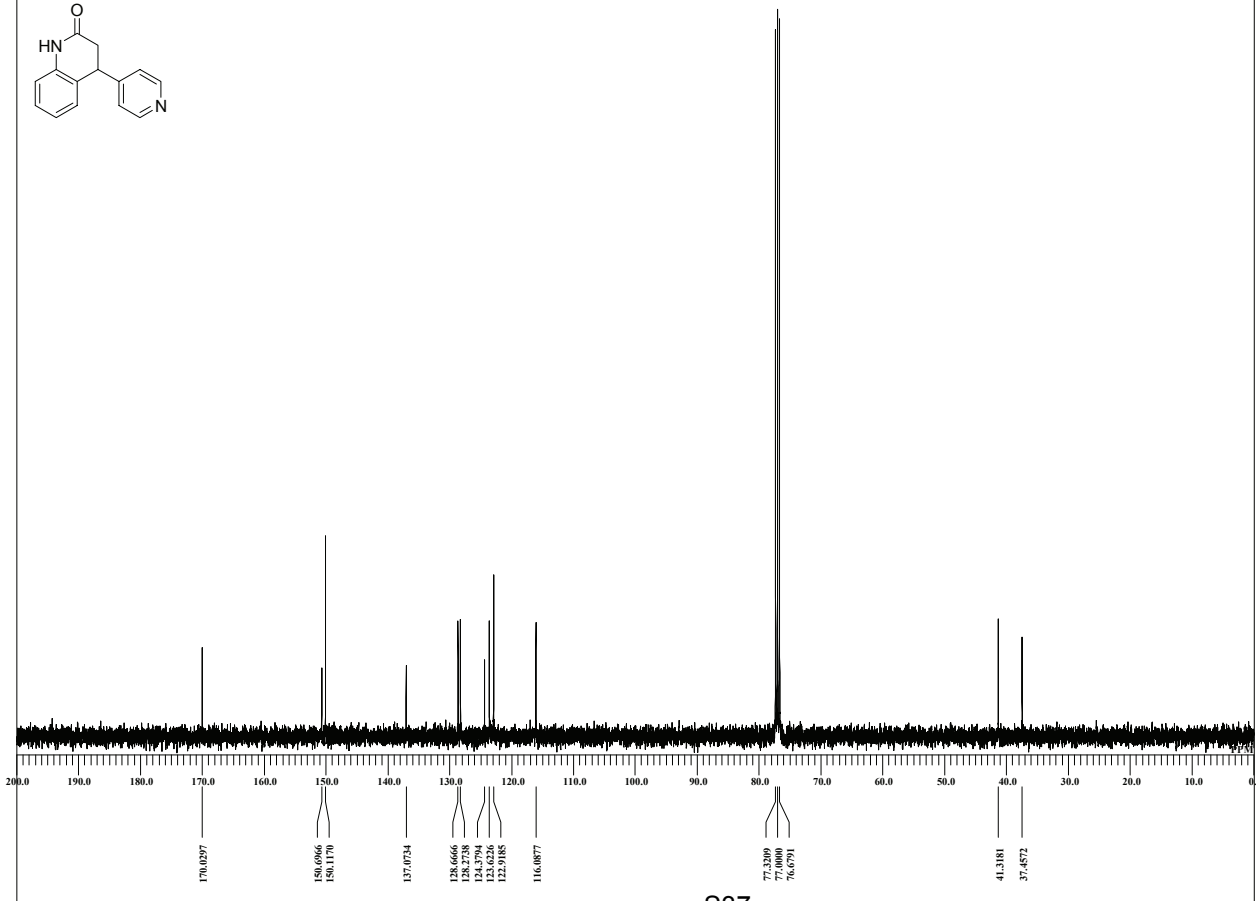

```

DFILE TH-13-167-f44-54C-1.jdf
COMNT TH-13-167-f44-54C
DATIM 16-11-2012 20:35:27
MENUF
MENUMF
OBNUC 13C
OFR 99.55 MHz
OBFREQ 99.55 MHz
OBSET 5.13 KHz
OBFIN 0.98 Hz
PWI 3.25 usec
DEADT 0.00 usec
PREDL 0.00000 msec
IWT 1.0000 sec
POINT 65536
SPO 65536
TIMES 42
DUMMY 4
FREQU 31250.00 Hz
FLT 125000 Hz
DELAY 20.50 usec
ACQTM 1.0486 sec
PD 6.0000 sec
SCANS 42
ADBT 16
RGAIN 60
BF 1.00 Hz
T1 0.00
T2 0.00
T3 90.00
T4 100.00
EXMOD single_pulse_dec
IRNUC 1H
IFR 395.88 MHz
IRSET 6.28 kHz
IRFIN 0.87 Hz
IRRPW 115 usec
IRATN 79
DFILE TH-13-167-f44-54C-1.jdf
SF
LKSET 13.20 KHz
LKFIN 75.7 Hz
LKLEV 0
LGAIN 0
LKPBS 0
LKSG 0
CSPED 0 Hz
FILDC
FILDF
CTEMP 23.0 c
SLVNT CDCl3
EXREF 77.00 ppm
    
```

TH-14-1-3rd-f28-38

C:\Documents and Settings\PC-USER\My Documents\Data\Hoshikawa\14\14-1\TH-14-1-3rd-f28-38-1.ac

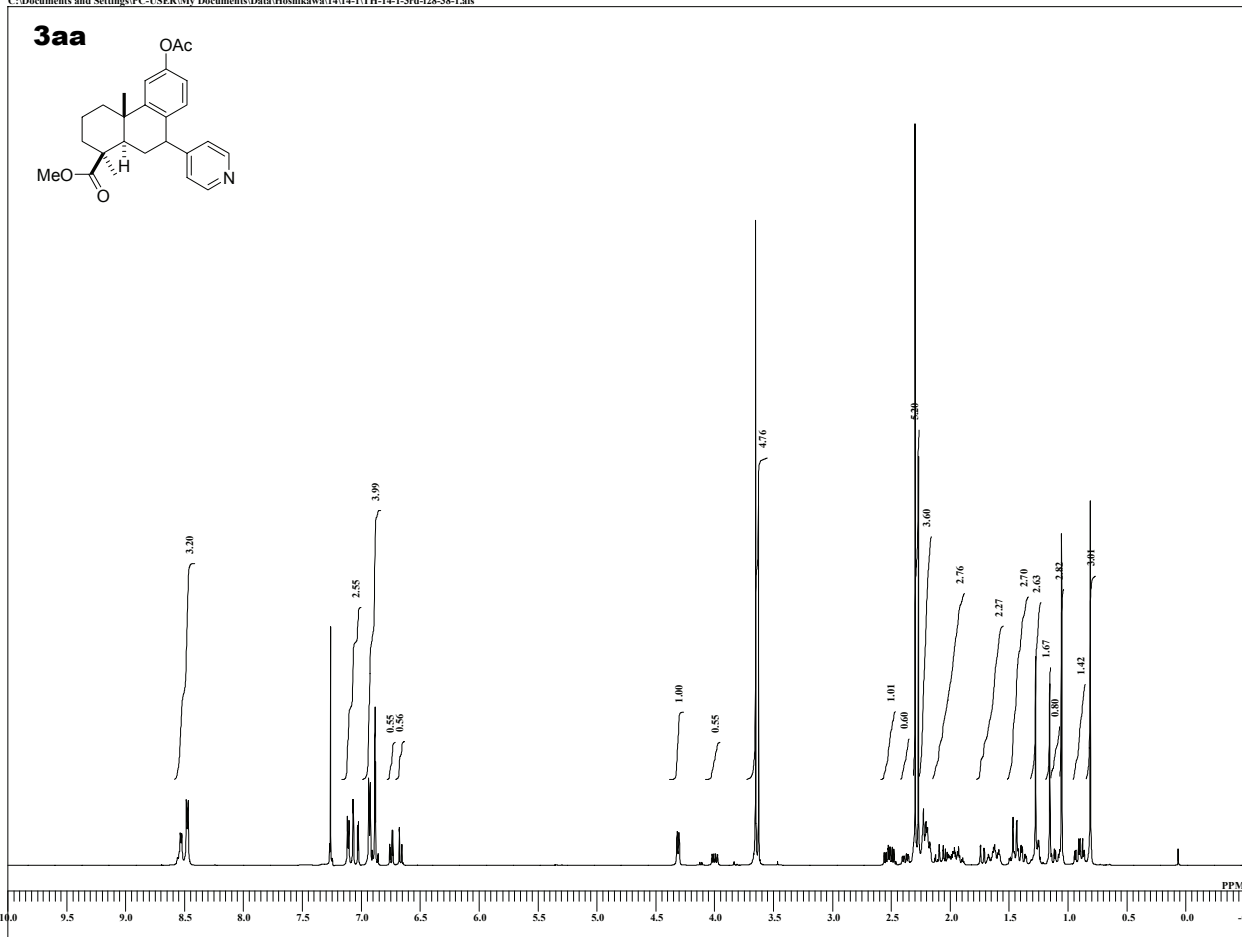

```

DFILE TH-14-1-3rd-f28-38-1.ac
COMNT TH-14-1-3rd-f28-38
DATIM 06-03-2013 21:21:37
MENUF
OBNUC 1H
OFR 395.88 MHz
OBRFQ 395.88 MHz
OBSET 6.28 KHz
OBFIN 0.87 Hz
PWI 6.38 usec
DEADT 0.00 usec
PREDL 0.00000 msec
IWT 1.0000 sec
POINT 13107
SPO 13107
TIMES 8
DUMMY 1
FREQU 5938.15 Hz
FLT 30000 Hz
DELAY 16.68 usec
ACQTM 2.2073 sec
PD 5.0000 sec
SCANS 8
ADBIT 16
RGAIN 38
BF 0.01 Hz
T1 0.00
T2 0.00
T3 100.00
T4 100.00
EXMOD single_pulse.ex2
IRNUC 1H
IFR 395.88 MHz
IRSET 6.28 kHz
IRFIN 0.87 Hz
IRRPW 115 usec
IRATN 79
DFILE TH-14-1-3rd-f28-38-1.ac
SF
LKSET 13.20 KHz
LKFIN 75.7 Hz
LKLEV 0
LGAIN 0
LKPHS 0
LKSG 0
CSPE 0 Hz
FILDC
FILDF
CTEMP 20.4 c
SLVNT CDCl3
EXREF 7.26 ppm
    
```

TH-41-1-3rd-f28-38C

C:\Documents and Settings\PC-USER\My Documents\Data\Hoshikawa\14\14-1\TH-41-1-3rd-f28-38C-1.ac

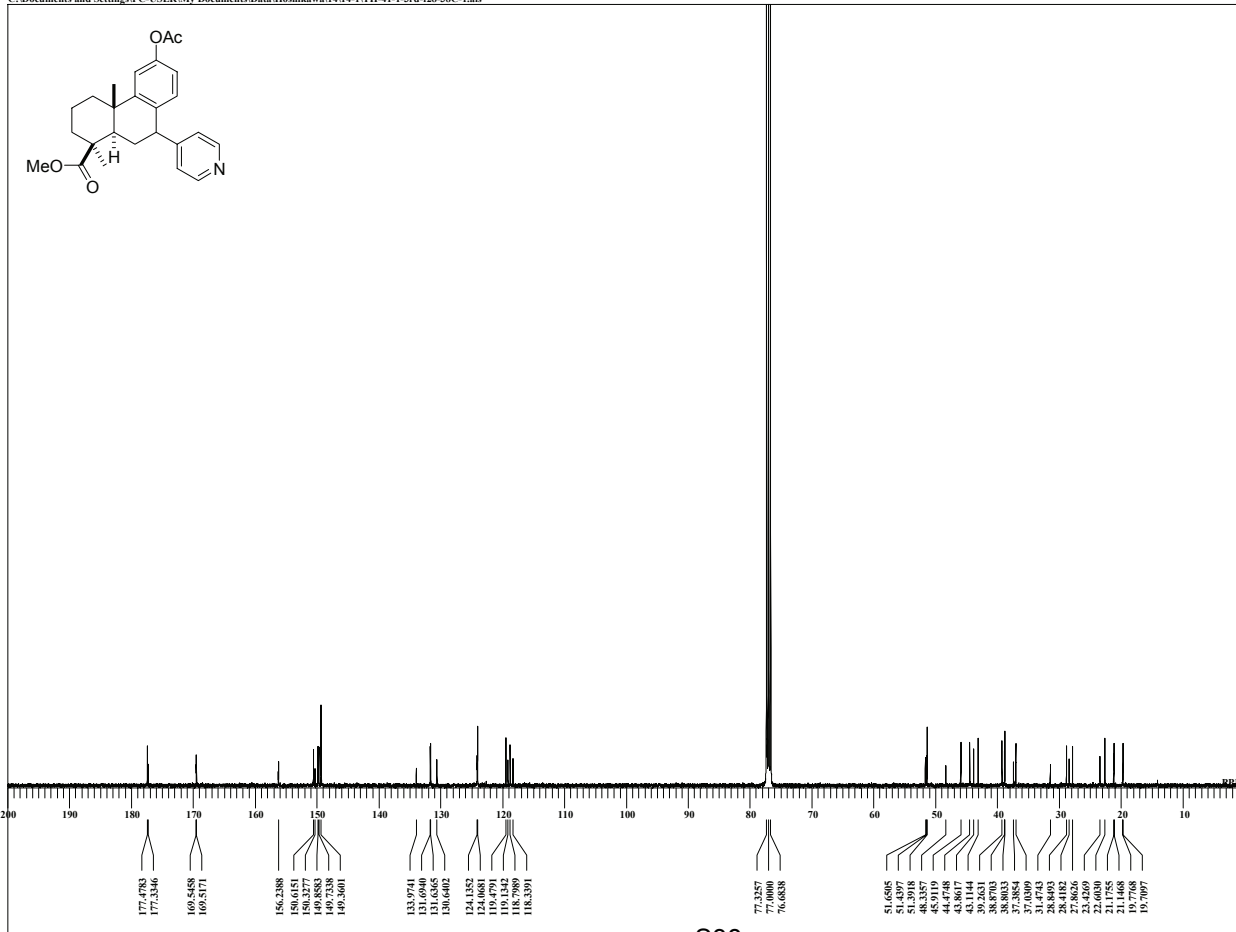

```

DFILE TH-41-1-3rd-f28-38C-1.ac
COMNT TH-41-1-3rd-f28-38C
DATIM 07-03-2013 06:26:25
MENUF
OBNUC 13C
OFR 99.55 MHz
OBRFQ 99.55 MHz
OBSET 5.13 KHz
OBFIN 0.98 Hz
PWI 3.25 usec
DEADT 0.00 usec
PREDL 0.00000 msec
IWT 1.0000 sec
POINT 32768
SPO 32768
TIMES 3600
DUMMY 4
FREQU 31250.00 Hz
FLT 125000 Hz
DELAY 20.50 usec
ACQTM 1.0486 sec
PD 8.0000 sec
SCANS 3600
ADBIT 16
RGAIN 60
BF 1.00 Hz
T1 0.00
T2 0.00
T3 100.00
T4 100.00
EXMOD single_pulse_dec
IRNUC 1H
IFR 395.88 MHz
IRSET 6.28 kHz
IRFIN 0.87 Hz
IRRPW 115 usec
IRATN 79
DFILE TH-41-1-3rd-f28-38C-1.ac
SF
LKSET 13.20 KHz
LKFIN 75.7 Hz
LKLEV 0
LGAIN 0
LKPHS 0
LKSG 0
CSPE 0 Hz
FILDC
FILDF
CTEMP 20.4 c
SLVNT CDCl3
EXREF 77.00 ppm
    
```

TH-13-193-2nd-f2-8

C:\Documents and Settings\PC-USER\My Documents\Data\Hoshikawa\13\TH-13-193-2nd-f2-8-1.jdf

**1bb**

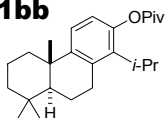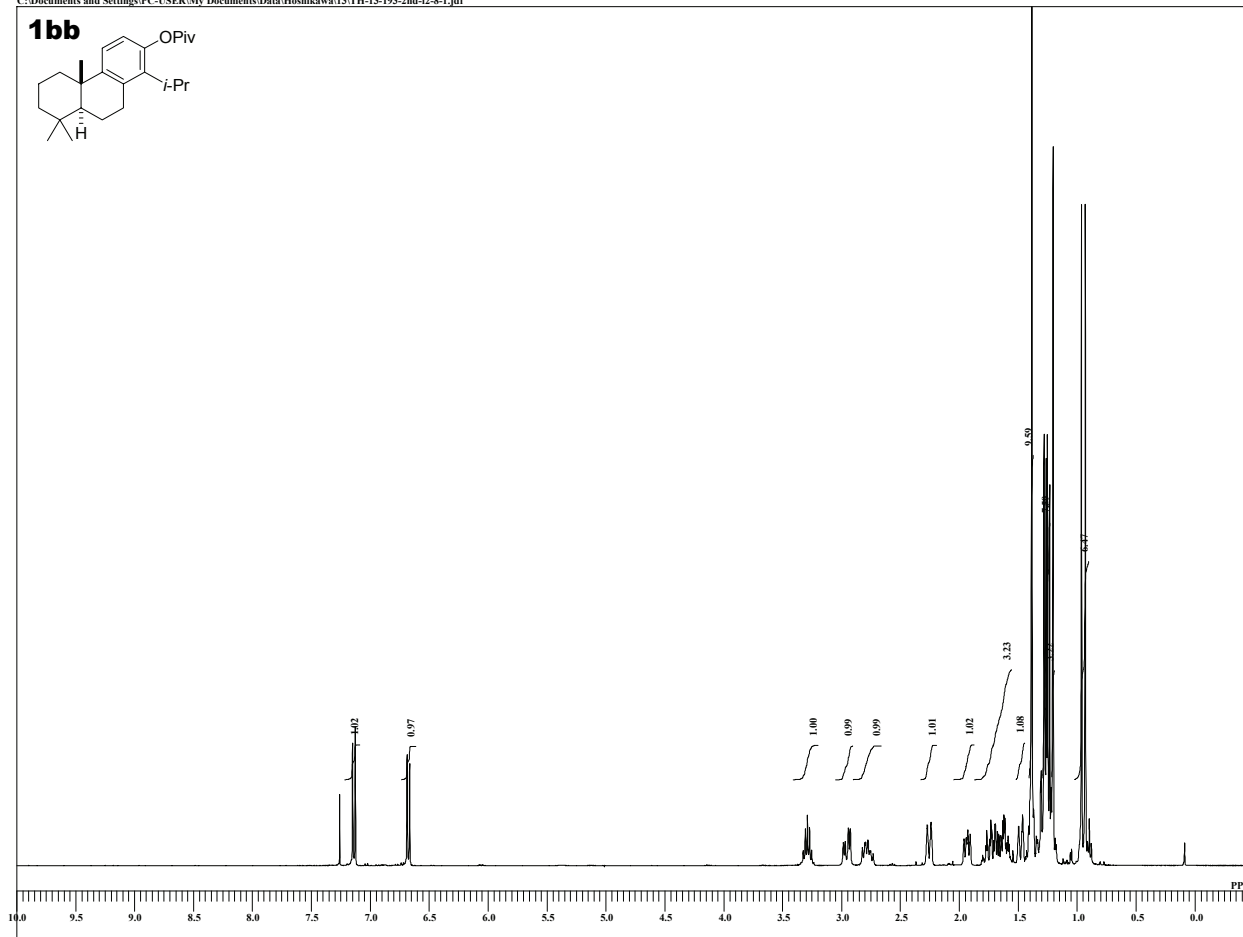

```

DFILE TH-13-193-2nd-f2-8-1.jdf
COMNT TH-13-193-2nd-f2-8
DATIM 29-01-2013 14:22:33
MENUF
MENUC
OBNUC 1H
OFR 395.88 MHz
OBFQ 395.88 MHz
OBSE 6.28 KHz
OBFN 0.87 Hz
PWI 6.38 usec
DEAD 0.00 usec
PREDL 0.00000 msec
IWT 1.0000 sec
POINT 16384
SPO 16384
TIMES 8
DUMMY 1
FREQU 7422.80 Hz
FLT 30000 Hz
DELAY 16.68 usec
ACQTM 2.2073 sec
PD 5.0000 sec
SCANS 8
ADBT 16
RGAIN 24
BF 0.01 Hz
T1 0.00
T2 0.00
T3 90.00
T4 100.00
EXMOD single_pulse.ex2
IRNUC 1H
IFR 395.88 MHz
IRSE 6.28 kHz
IRFN 0.87 Hz
IRPW 115 usec
IRATN 79
DFILE TH-13-193-2nd-f2-8-1.jdf
SF
LKSE 13.20 KHz
LKFN 75.7 Hz
LKLE 0
LGAIN 0
LKPH 0
LKSG 0
CSPED 0 Hz
FILDC
FILDF
CTEMP 20.3 c
SLVNT CDCl3
EXREF 7.26 ppm
    
```

TH-13-193-2nd-f2-8C

C:\Documents and Settings\PC-USER\My Documents\Data\Hoshikawa\13\TH-13-193-2nd-f2-8C-1.lak

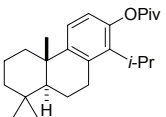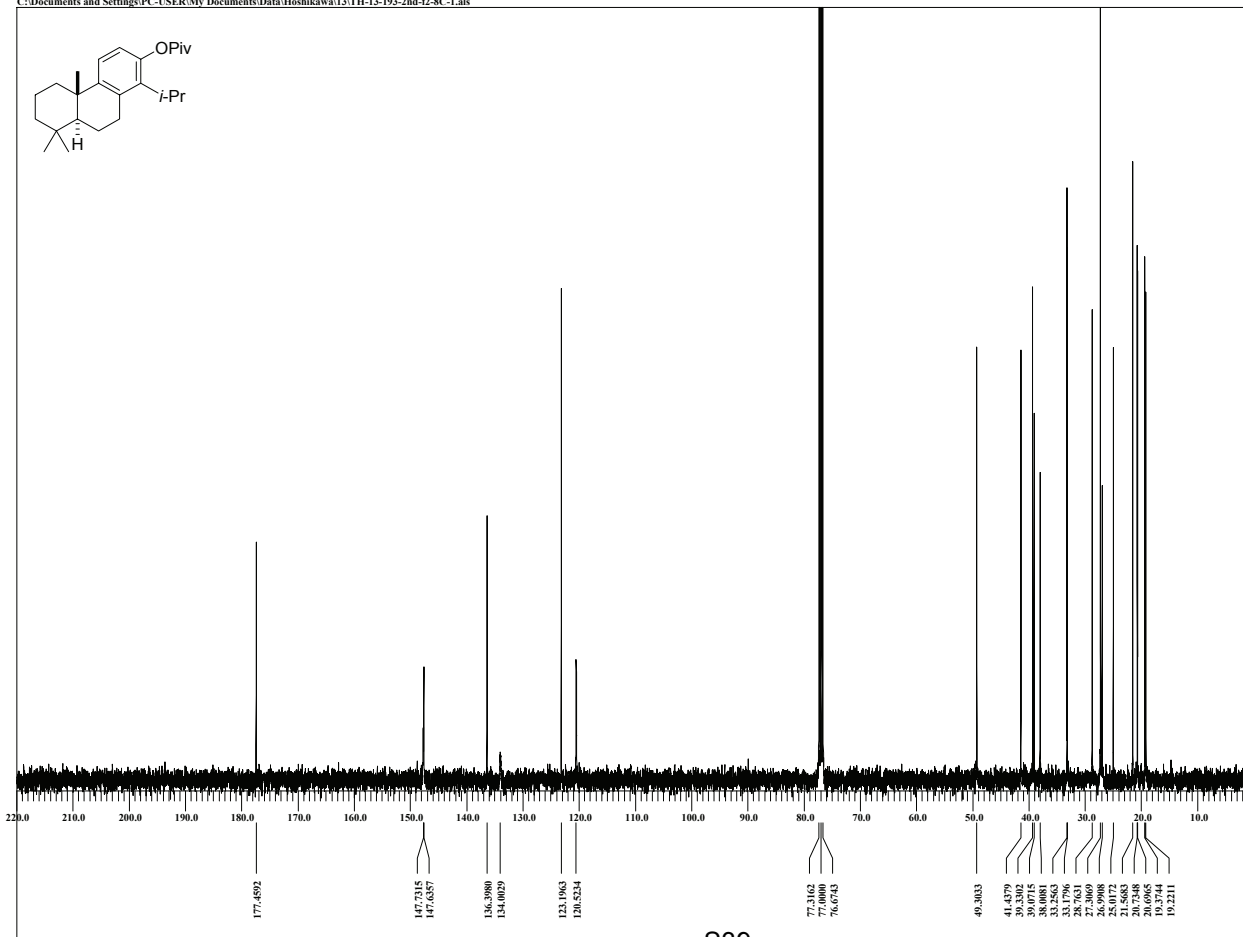

```

DFILE TH-13-193-2nd-f2-8C-1.lak
COMNT TH-13-193-2nd-f2-8C
DATIM 29-01-2013 14:39:22
MENUF
MENUC
OBNUC 13C
OFR 99.55 MHz
OBFQ 99.55 MHz
OBSE 5.13 KHz
OBFN 0.98 Hz
PWI 3.25 usec
DEAD 0.00 usec
PREDL 0.00000 msec
IWT 1.0000 sec
POINT 26214
SPO 26214
TIMES 102
DUMMY 4
FREQU 24999.62 Hz
FLT 125000 Hz
DELAY 20.50 usec
ACQTM 1.0486 sec
PD 8.0000 sec
SCANS 102
ADBT 16
RGAIN 60
BF 1.00 Hz
T1 0.00
T2 0.00
T3 90.00
T4 100.00
EXMOD single_pulse_dec
IRNUC 1H
IFR 395.88 MHz
IRSE 6.28 kHz
IRFN 0.87 Hz
IRPW 115 usec
IRATN 79
DFILE TH-13-193-2nd-f2-8C-1.lak
SF
LKSE 13.20 KHz
LKFN 75.7 Hz
LKLE 0
LGAIN 0
LKPH 0
LKSG 0
CSPED 0 Hz
FILDC
FILDF
CTEMP 20.6 c
SLVNT CDCl3
EXREF 77.00 ppm
    
```

TH-13-199-f47-50H

C:\Documents and Settings\PC-USER\My Documents\Data\Hoshikawa\13\13-199\TH-13-199-f47-50H-1.a

**3bb- $\alpha$**

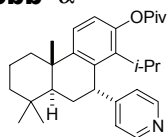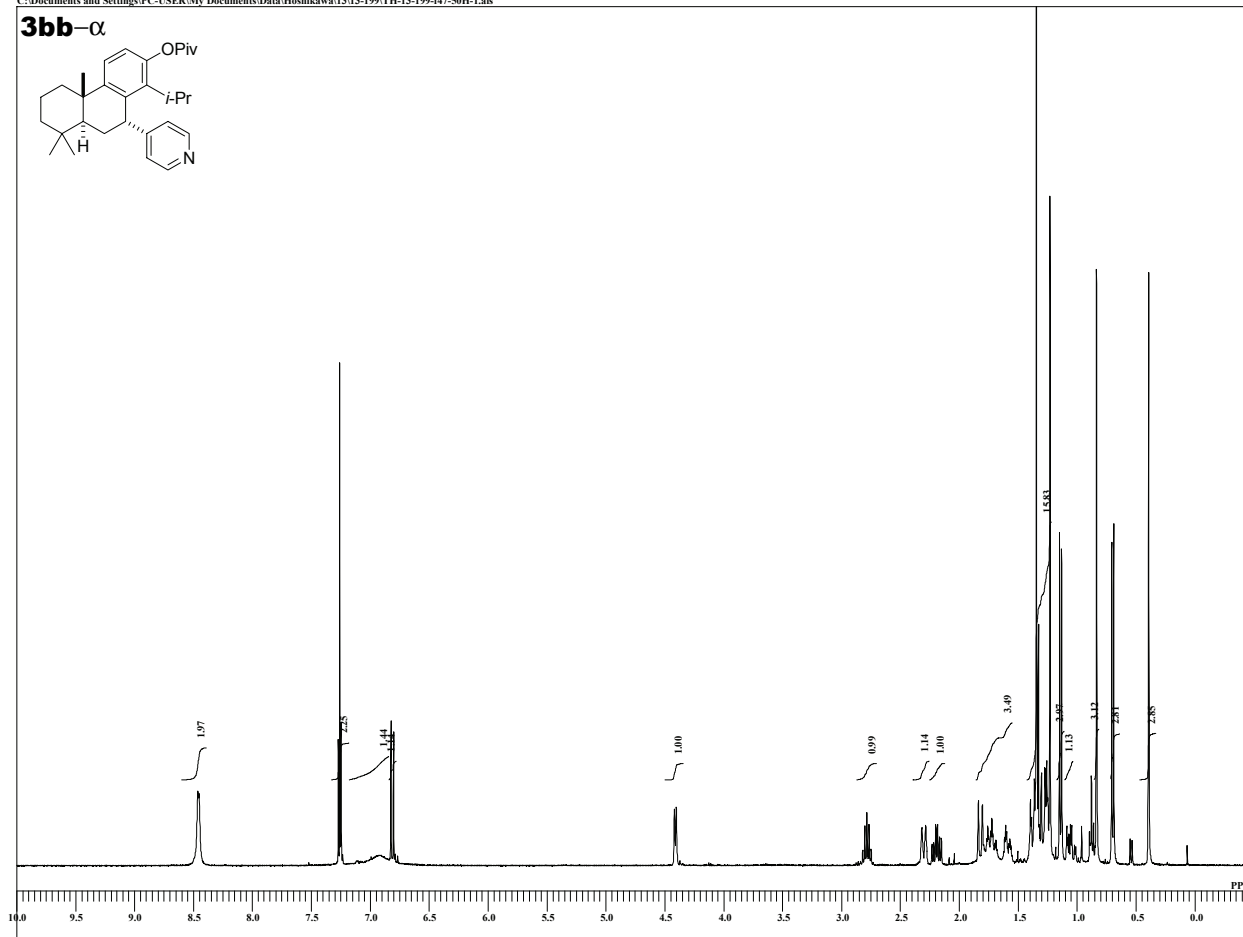

```

DFILE TH-13-199-f47-50H-1.a
COMNT TH-13-199-f47-50H
DATIM 02-02-2013 18:16:39
MENUF
MNUF
OBNUC 1H
OFR 395.88 MHz
OBFQ 395.88 MHz
OBSE 6.28 KHz
OBFN 0.87 Hz
PWI 6.38 usec
DEAD 0.00 usec
PREDL 0.00000 msec
IWT 1.0000 sec
POINT 13107
SPO 13107
TIMES 8
DUMMY 1
FREQU 5938.15 Hz
FLT 30000 Hz
DELAY 16.68 usec
ACQTM 2.2073 sec
PD 5.0000 sec
SCANS 8
ADBT 16
RGAIN 40
BF 0.01 Hz
T1 0.00
T2 0.00
T3 90.00
T4 100.00
EXMOD single_pulse.ex2
IRNUC 1H
IFR 395.88 MHz
IRSE 6.28 kHz
IRFN 0.87 Hz
IRRPW 147 usec
IRATN 79
DFILE TH-13-199-f47-50H-1.a
SF
LKSET 13.20 KHz
LKFN 75.7 Hz
LKLEV 0
LGAIN 0
LKPHS 0
LKSG 0
CSPED 0 Hz
FILDC
FILDF
CTEMP 20.8 c
SLVNT CDCl3
EXREF 7.26 ppm
    
```

TH-13-199-f47-50C

C:\Documents and Settings\PC-USER\My Documents\Data\Hoshikawa\13\13-199\TH-13-199-f47-50C-1.a

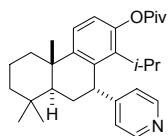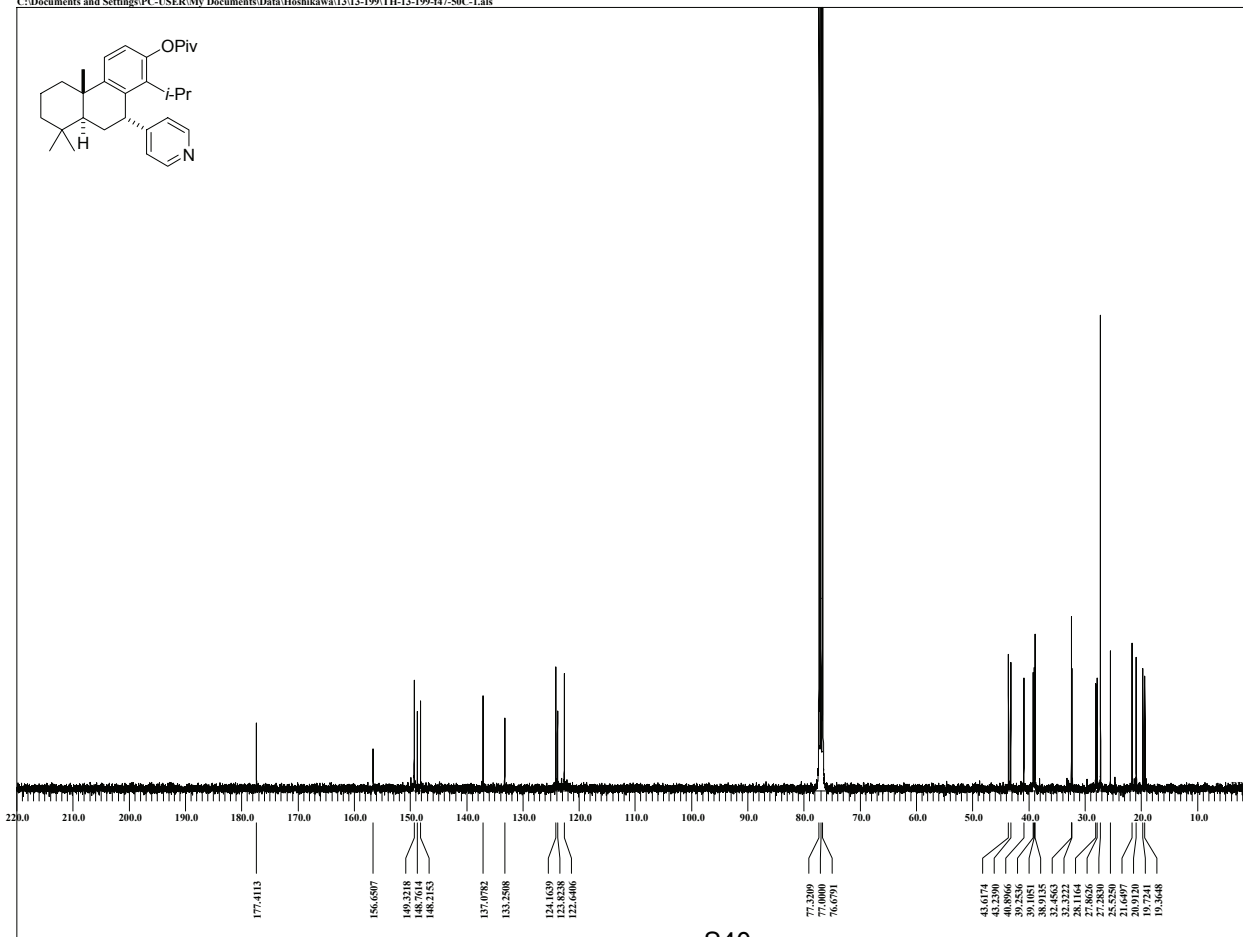

```

DFILE TH-13-199-f47-50C-1.a
COMNT TH-13-199-f47-50C
DATIM 03-02-2013 01:26:23
MENUF
MNUF
OBNUC 13C
OFR 99.55 MHz
OBFQ 99.55 MHz
OBSE 5.13 KHz
OBFN 0.98 Hz
PWI 3.25 usec
DEAD 0.00 usec
PREDL 0.00000 msec
IWT 1.0000 sec
POINT 52428
SPO 52428
TIMES 4
DUMMY 4
FREQU 24999.62 Hz
FLT 125000 Hz
DELAY 20.50 usec
ACQTM 1.0486 sec
PD 8.0000 sec
SCANS 2800
ADBT 16
RGAIN 60
BF 1.00 Hz
T1 0.00
T2 0.00
T3 90.00
T4 100.00
EXMOD single_pulse_dec
IRNUC 1H
IFR 395.88 MHz
IRSE 6.28 kHz
IRFN 0.87 Hz
IRRPW 115 usec
IRATN 79
DFILE TH-13-199-f47-50C-1.a
SF
LKSET 13.20 KHz
LKFN 75.7 Hz
LKLEV 0
LGAIN 0
LKPHS 0
LKSG 0
CSPED 0 Hz
FILDC
FILDF
CTEMP 20.6 c
SLVNT CDCl3
EXREF 77.00 ppm
    
```



TH-13-199-f56-61

C:\Documents and Settings\PC-USER\My Documents\Data\Hoshikawa\13\13-199-f56-61\TH-13-199-f56-61-1.a

**3bb-β**

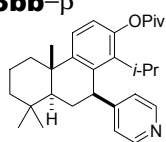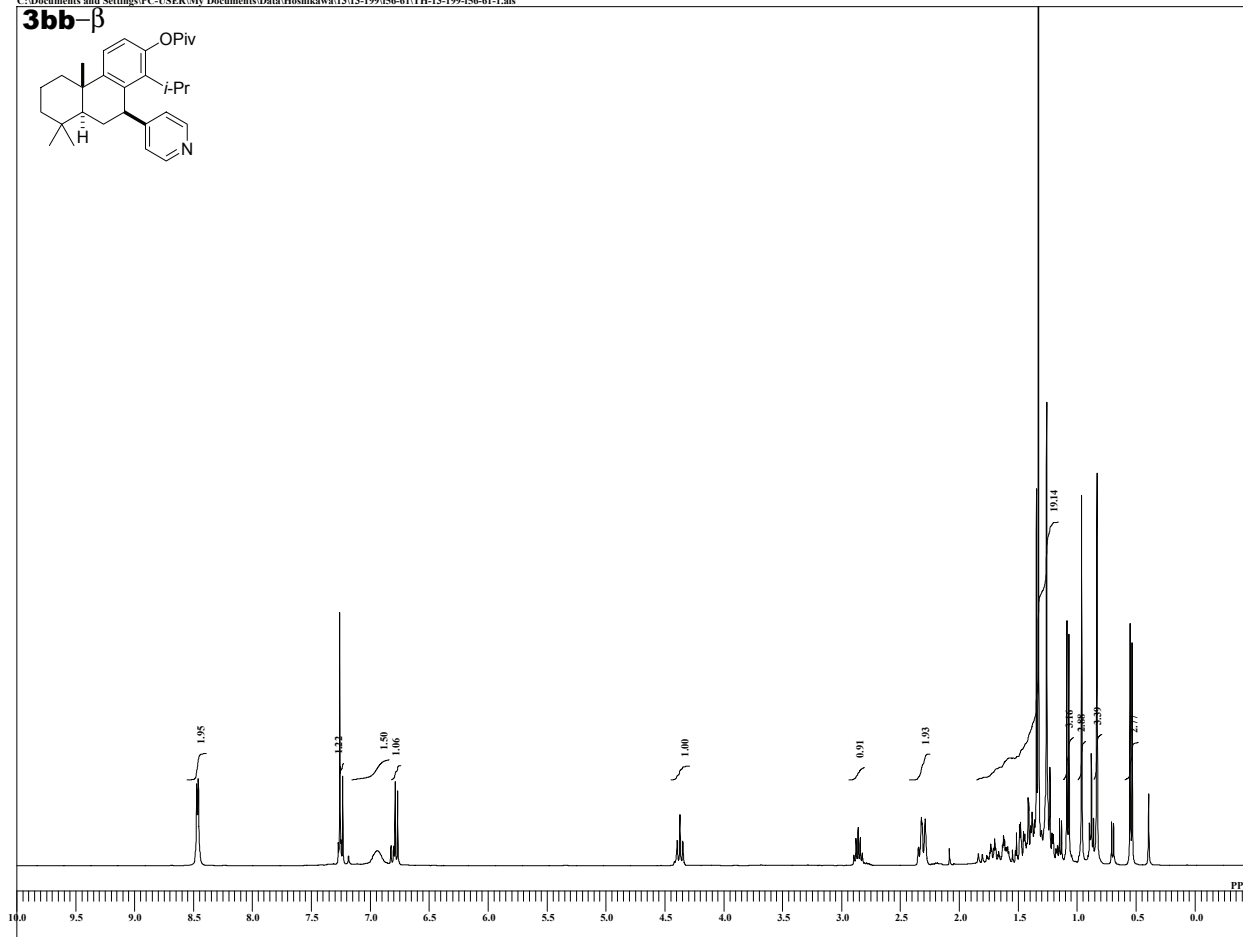

```

DFILE TH-13-199-f56-61-1.a
COMNT TH-13-199-f56-61
DATIM 02-02-2013 13:12:47
MENUF
MENUMF
OBNUC 1H
OFR 395.88 MHz
OBFREQ 395.88 MHz
OBSET 6.28 KHz
OBFIN 0.87 Hz
PWI 6.38 usec
DEADT 0.00 usec
PREDL 0.00000 msec
IWT 1.0000 sec
POINT 13107
SPO 13107
TIMES 8
DUMMY 1
FREQU 5938.15 Hz
FLT 30000 Hz
DELAY 16.68 usec
ACQTM 2.2073 sec
PD 5.0000 sec
SCANS 8
ADBT 16
RGAIN 36
BF 0.20 Hz
T1 0.00
T2 0.00
T3 90.00
T4 100.00
EXMOD single_pulse.ex2
IRNUC 1H
IFR 395.88 MHz
IRSET 6.28 kHz
IRFIN 0.87 Hz
IRRPW 115 usec
IRATN 79
DFILE TH-13-199-f56-61-1.a
SF
LKSET 13.20 KHz
LKFIN 75.7 Hz
LKLEV 0
LGAIN 0
LKPBS 0
LKSG 0
CSPED 0 Hz
FILDC
FILDF
CTEMP 20.7 c
SLVNT CDCl3
EXREF 7.26 ppm
    
```

TH-13-199-f56-61C

C:\Documents and Settings\PC-USER\My Documents\Data\Hoshikawa\13\TH-13-199-f56-61C-2.a

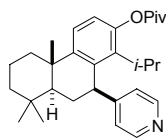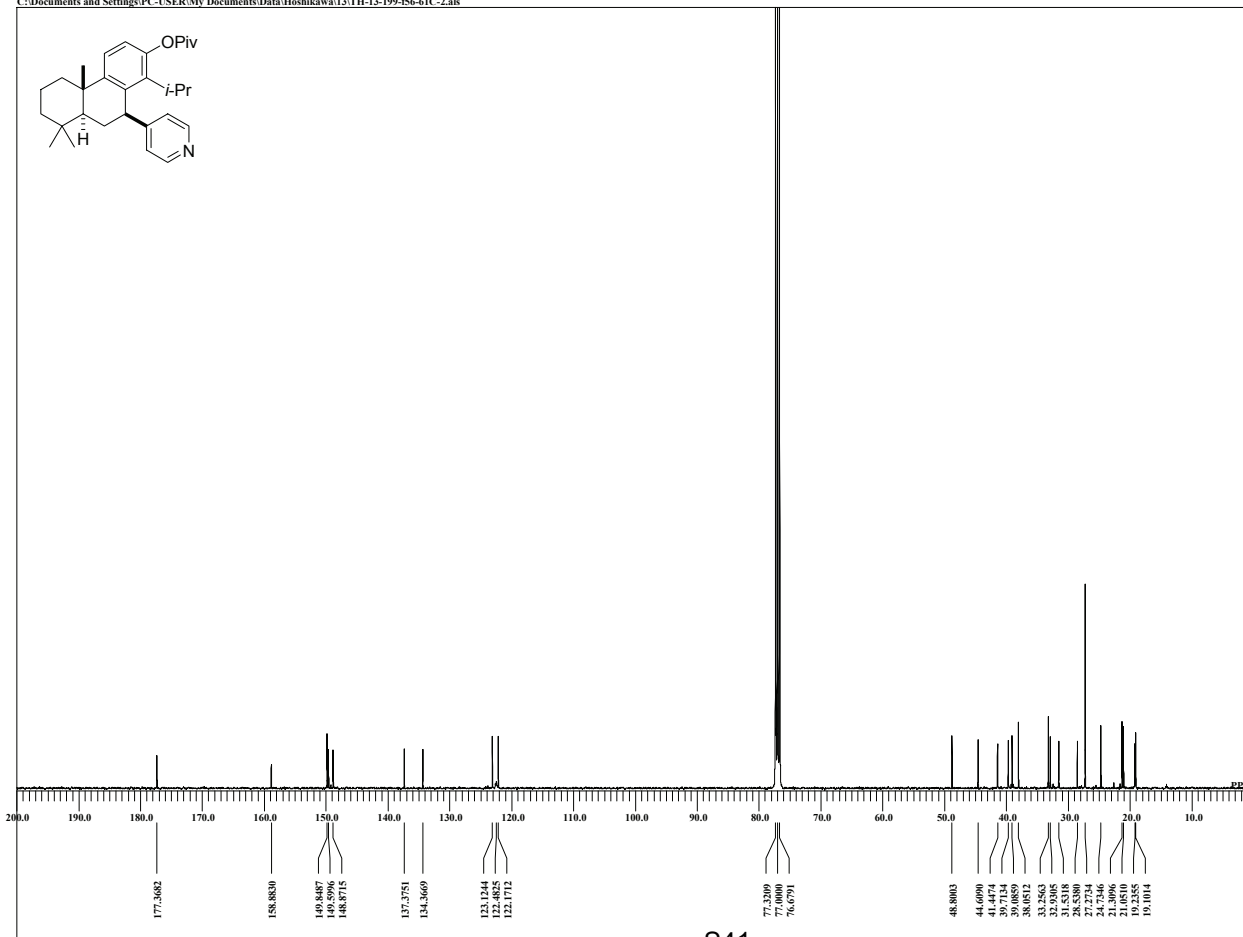

```

DFILE TH-13-199-f56-61C-2.a
COMNT TH-13-199-f56-61C
DATIM 05-02-2013 04:01:28
MENUF
MENUMF
OBNUC 13C
OFR 99.58 MHz
OBFREQ 99.58 MHz
OBSET 5.13 KHz
OBFIN 0.98 Hz
PWI 3.25 usec
DEADT 0.00 usec
PREDL 0.00000 msec
IWT 1.0000 sec
POINT 52428
SPO 52428
TIMES 4
DUMMY 4
FREQU 24999.62 Hz
FLT 125000 Hz
DELAY 20.50 usec
ACQTM 1.0486 sec
PD 8.0000 sec
SCANS 2400
ADBT 16
RGAIN 60
BF 1.00 Hz
T1 0.00
T2 0.00
T3 90.00
T4 100.00
EXMOD single_pulse_dec
IRNUC 1H
IFR 395.88 MHz
IRSET 6.28 kHz
IRFIN 0.87 Hz
IRRPW 115 usec
IRATN 79
DFILE TH-13-199-f56-61C-2.a
SF
LKSET 13.20 KHz
LKFIN 75.7 Hz
LKLEV 0
LGAIN 0
LKPBS 0
LKSG 0
CSPED 0 Hz
FILDC
FILDF
CTEMP 20.5 c
SLVNT CDCl3
EXREF 77.00 ppm
    
```

TH-13-93-f20-30

C:\Documents and Settings\PC-USER\My Documents\Data\Hoshikawa\13\TH-13-93-f20-30.1

3cc

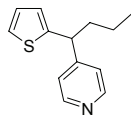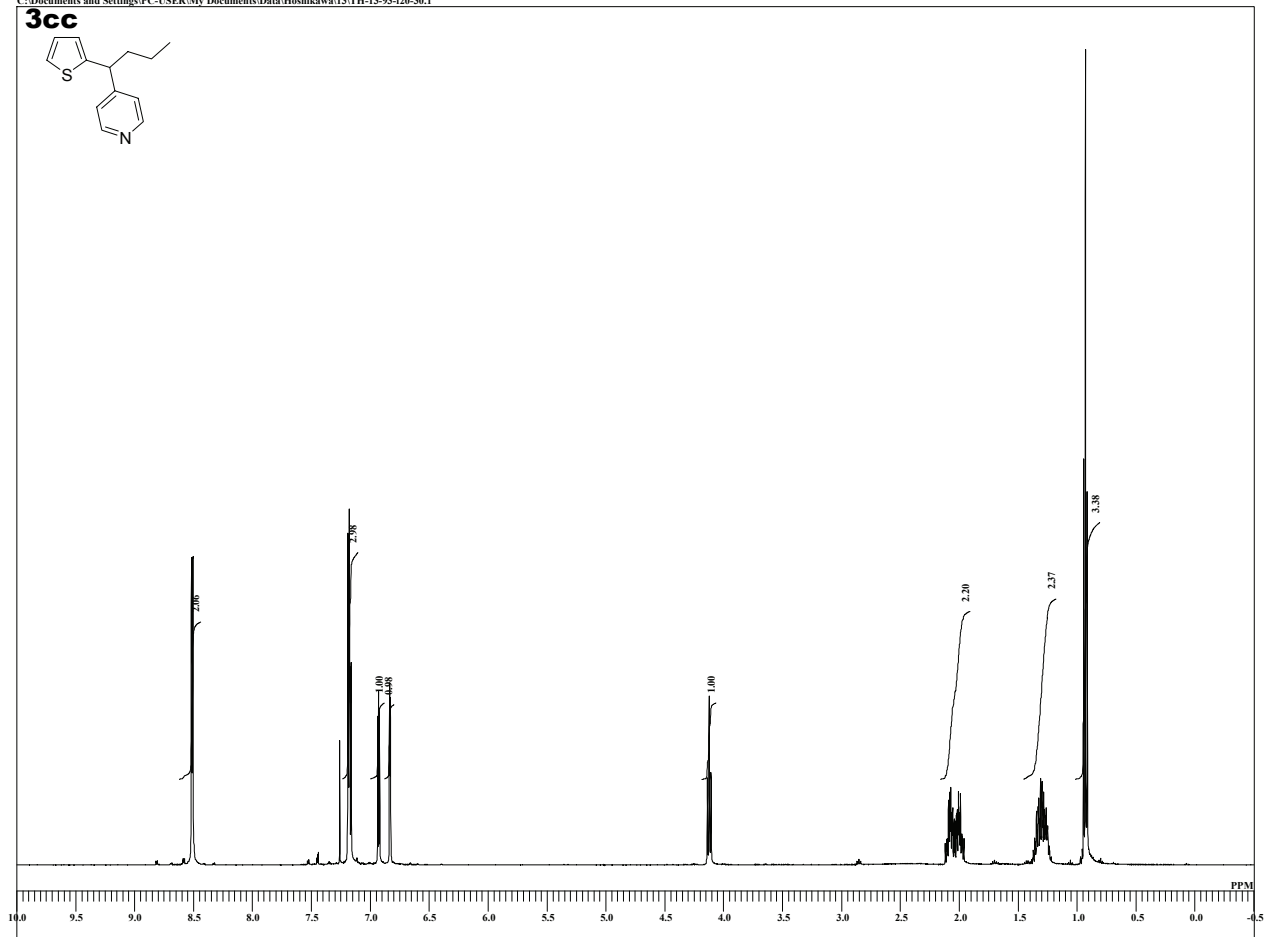

```

DFILE TH-13-93-f20-30.1
COMNT TH-13-93-f20-30
DATIM 07-10-2012 21:19:45
MENUC
OBNUC
OFR 490.15 MHz
OBFREQ 9.16 KHz
OBSET 7.60 Hz
OBFIN 6.50 usec
PWI 0.00 usec
DEADT 0.000000 msec
PREDL 1.00000 sec
IWT 16384
POINT 16384
SPO 8
TIMES 1
DUMMY 1
FREQ 9191.18 Hz
FLT 37000 Hz
DELAY 13.52 usec
ACQTM 1.7826 sec
PD 5.0000 sec
SCANS 8
ADBT 16
RGAIN 36
BF 0.01 Hz
T1 0.00
T2 0.00
T3 90.00
T4 100.00
EXMOD single_pulse.ex2
IRNUC 1H
IFR 490.15 MHz
IRSET 9.16 kHz
IRFIN 7.60 Hz
IRRPW 92 usec
IRATN 79
DFILE TH-13-93-f20-30.1
SF
LKSET 70.30 KHz
LKFIN 32.5 Hz
LKLEV 0
LGAIN 0
LKPHS 0
LKSG 0
CSPED 0 Hz
FILDC
FILDF
CTEMP 25.3 c
SLVNT CDCl3
EXREF 7.26 ppm
    
```

TH-13-93-f20-30C

C:\Documents and Settings\PC-USER\My Documents\Data\Hoshikawa\13\TH-13-93-f20-30C.1

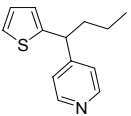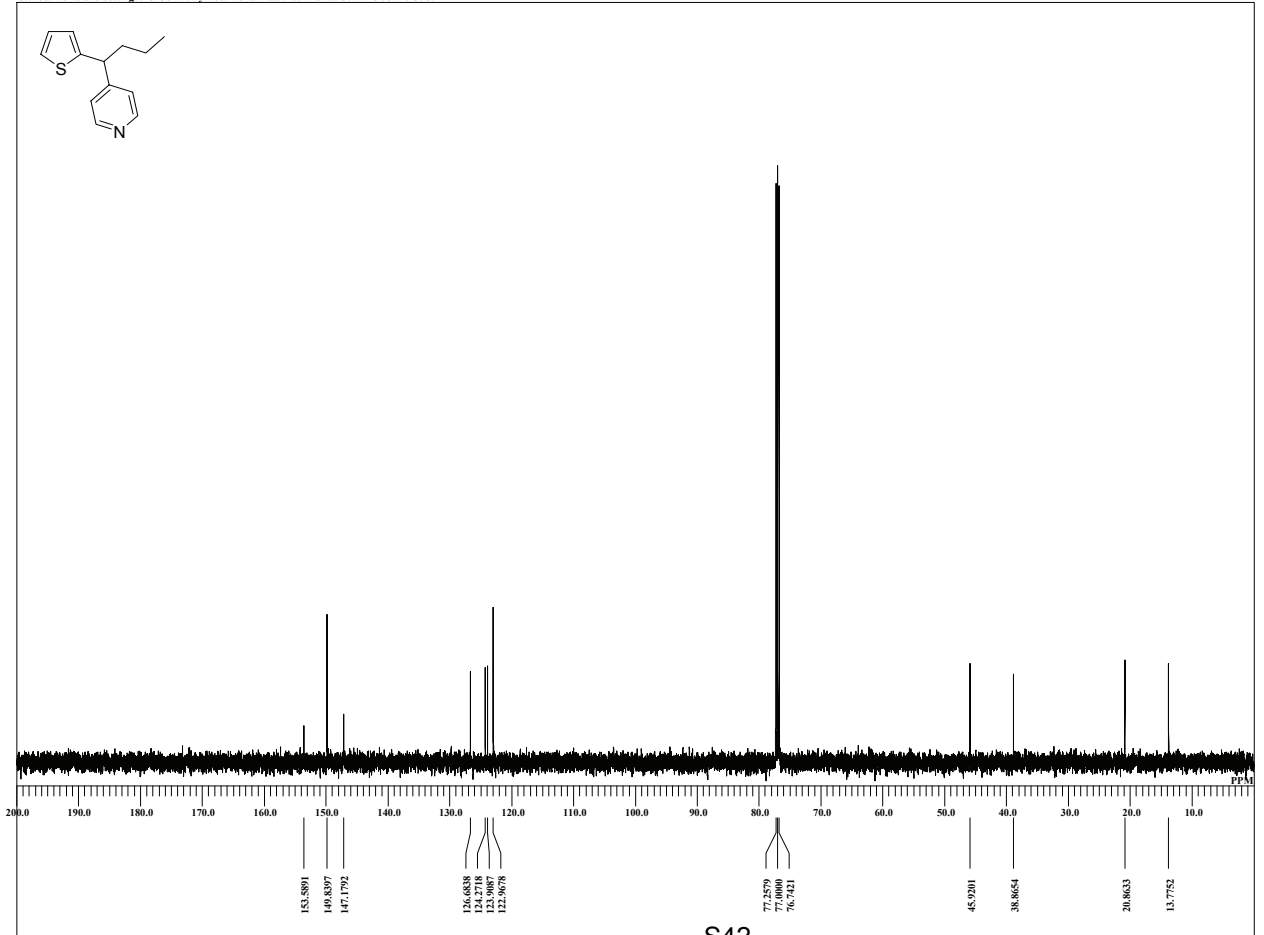

```

DFILE TH-13-93-f20-30C.1
COMNT TH-13-93-f20-30C
DATIM 07-10-2012 21:26:57
MENUC
OBNUC 13C
OFR 123.26 MHz
OBFREQ 123.26 MHz
OBSET 2.31 KHz
OBFIN 6.71 Hz
PWI 3.23 usec
DEADT 0.00 usec
PREDL 0.000000 msec
IWT 1.00000 sec
POINT 65536
SPO 65536
TIMES 34
DUMMY 4
FREQ 38580.25 Hz
FLT 155000 Hz
DELAY 21.06 usec
ACQTM 0.8493 sec
PD 8.0000 sec
SCANS 34
ADBT 16
RGAIN 60
BF 1.00 Hz
T1 0.00
T2 0.00
T3 90.00
T4 100.00
EXMOD single_pulse_dec
IRNUC 1H
IFR 490.15 MHz
IRSET 9.16 kHz
IRFIN 7.60 Hz
IRRPW 92 usec
IRATN 79
DFILE TH-13-93-f20-30C.1
SF
LKSET 70.30 KHz
LKFIN 32.5 Hz
LKLEV 0
LGAIN 0
LKPHS 0
LKSG 0
CSPED 0 Hz
FILDC
FILDF
CTEMP 25.9 c
SLVNT CDCl3
EXREF 77.00 ppm
    
```

TH-13-97-f24-31

C:\Documents and Settings\PC-USER\My Documents\Data\Hoshikawa\13\TH-13-97-f24-31-1.Lab

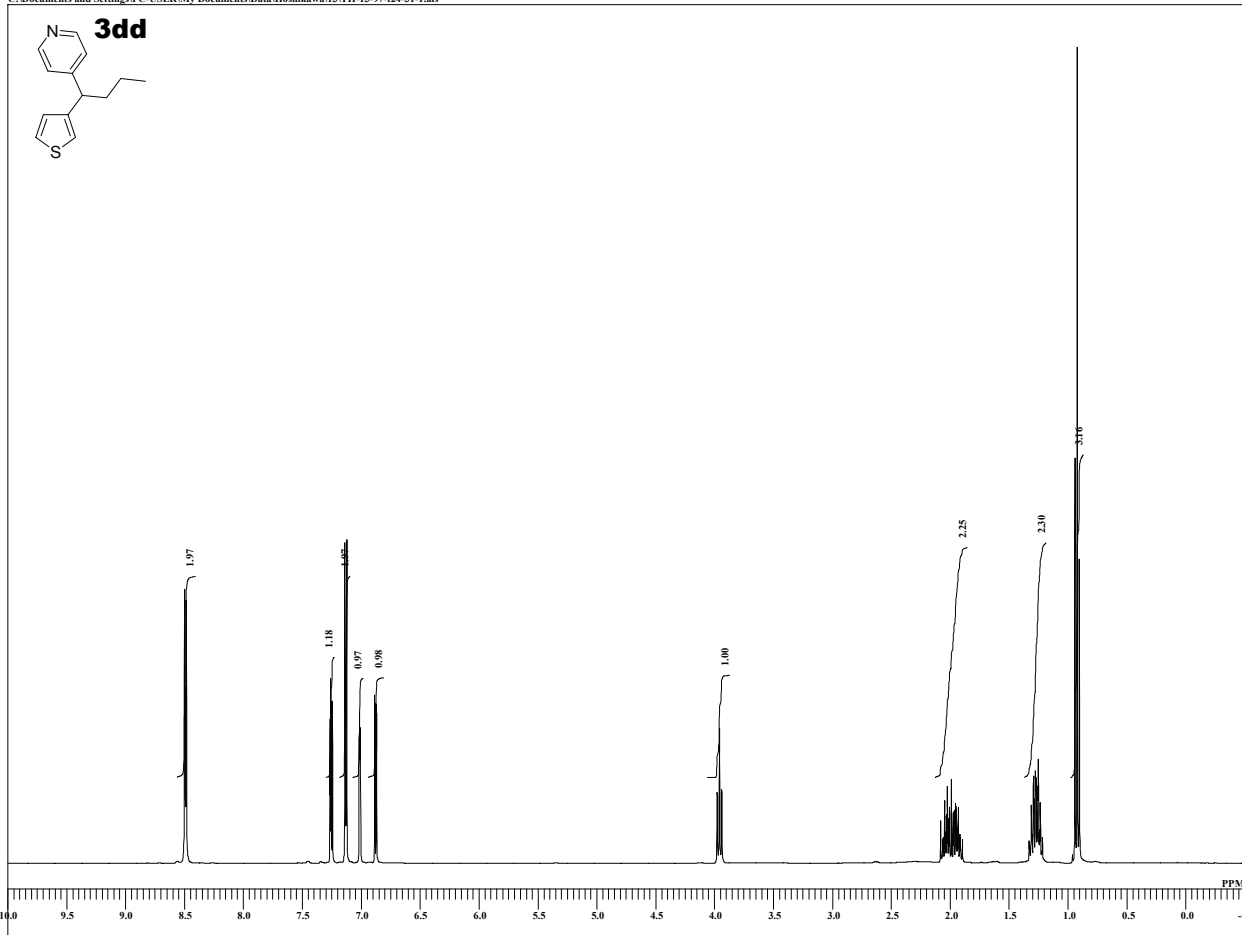

```

DFILE TH-13-97-f24-31-Lab
COMNT TH-13-97-f24-31
DATIM 11-10-2012 16:58:16
MENUF
MENUC
OBNUC 1H
OFR 395.88 MHz
OBFREQ 395.88 MHz
OBSET 6.28 KHz
OBFIN 0.87 Hz
PWI 6.38 usec
DEADT 0.00 usec
PREDL 0.00000 msec
IWT 1.0000 sec
POINT 16384
SPO 16384
TIMES 8
DUMMY 1
FREQU 7422.80 Hz
FLT 30000 Hz
DELAY 16.68 usec
ACQTM 2.2073 sec
PD 5.0000 sec
SCANS 8
ADBT 16
RGAIN 36
BF 0.01 Hz
T1 0.00
T2 0.00
T3 90.00
T4 100.00
EXMOD single_pulse.ex2
IRNUC 1H
IFR 395.88 MHz
IRSET 6.28 kHz
IRFIN 0.87 Hz
IRRPW 115 usec
IRATN 79
DFILE TH-13-97-f24-31-Lab
SF
LKSET 13.20 KHz
LKFIN 75.7 Hz
LKLEV 0
LGAIN 0
LKPHS 0
LKSG 0
CSPED 0 Hz
FILDC
FILDF
CTEMP 23.7 c
SLVNT CDCl3
EXREF 7.26 ppm
    
```

TH-13-97-f24-31C

C:\Documents and Settings\PC-USER\My Documents\Data\Hoshikawa\13\TH-13-97-f24-31C-1.Lab

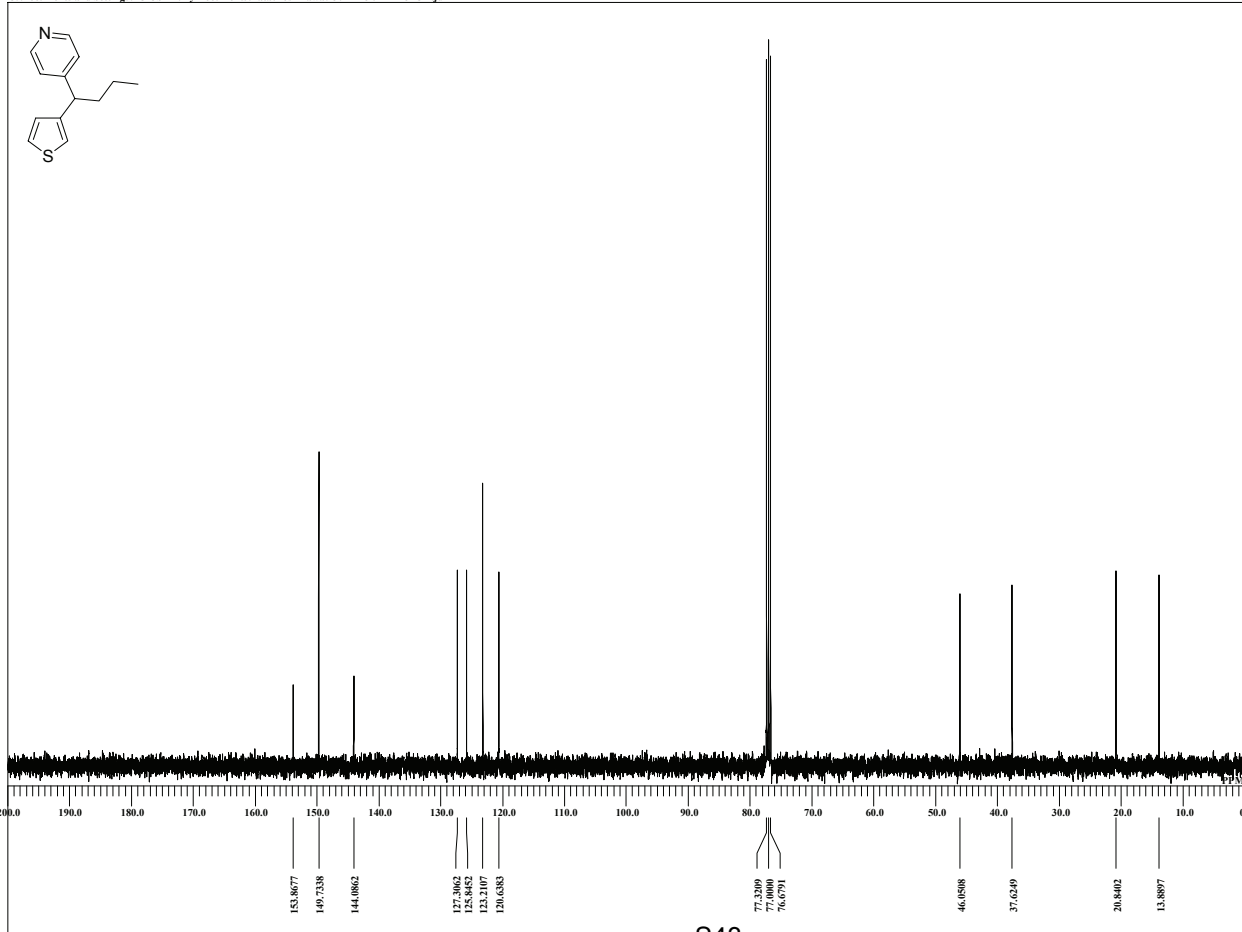

```

DFILE TH-13-97-f24-31C-1.Lab
COMNT TH-13-97-f24-31C
DATIM 11-10-2012 17:04:12
MENUF
MENUC
OBNUC 13C
OFR 99.55 MHz
OBFREQ 99.55 MHz
OBSET 5.13 KHz
OBFIN 0.98 Hz
PWI 3.25 usec
DEADT 0.00 usec
PREDL 0.00000 msec
IWT 1.0000 sec
POINT 65536
SPO 65536
TIMES 42
DUMMY 4
FREQU 31250.00 Hz
FLT 125000 Hz
DELAY 20.50 usec
ACQTM 1.0486 sec
PD 5.0000 sec
SCANS 42
ADBT 16
RGAIN 60
BF 1.00 Hz
T1 0.00
T2 0.00
T3 90.00
T4 100.00
EXMOD single_pulse_dec
IRNUC 1H
IFR 395.88 MHz
IRSET 6.28 kHz
IRFIN 0.87 Hz
IRRPW 115 usec
IRATN 79
DFILE TH-13-97-f24-31C-1.Lab
SF
LKSET 13.20 KHz
LKFIN 75.7 Hz
LKLEV 0
LGAIN 0
LKPHS 0
LKSG 0
CSPED 0 Hz
FILDC
FILDF
CTEMP 23.9 c
SLVNT CDCl3
EXREF 77.00 ppm
    
```

TH-14-7-f41-50

C:\Documents and Settings\PC-USER\My Documents\Data\Hoshikawa\14\TH-14-7-f41-50-L1.jdf

3ee

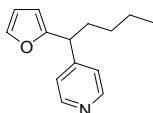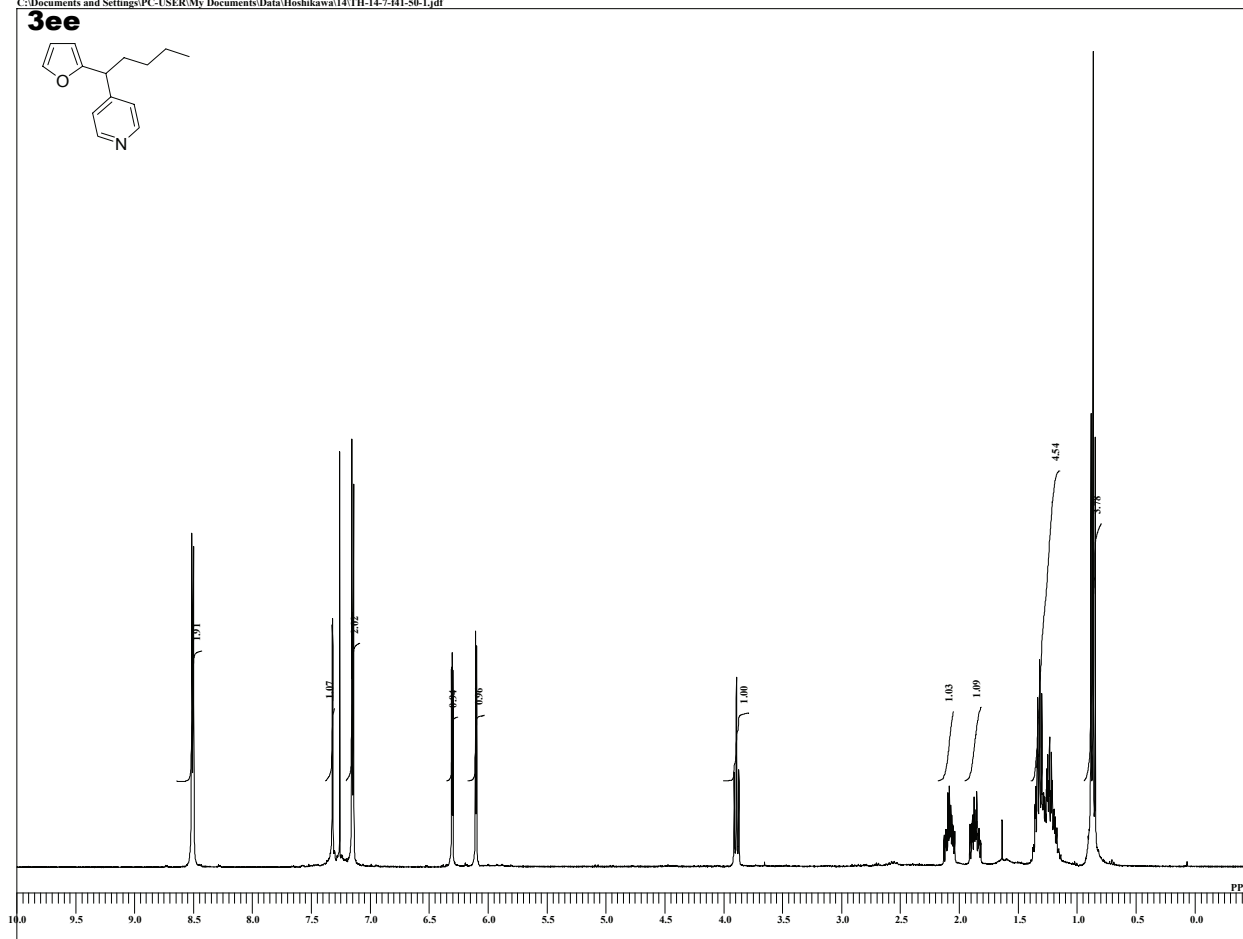

```

DFILE TH-14-7-f41-50-L1.jdf
COMNT TH-14-7-f41-50
DATIM 12-02-2013 19:00:16
MENUF
OBNUC
OFR 395.88 MHz
OBFREQ 395.88 MHz
OBSET 6.28 KHz
OBFIN 0.87 Hz
PWI 6.38 usec
DEADT 0.00 usec
PREDL 0.00000 msec
IWT 1.0000 sec
POINT 16384
SPO 16384
TIMES 8
DUMMY 1
FREQU 7422.80 Hz
FLT 30000 Hz
DELAY 16.68 usec
ACQTM 2.2073 sec
PD 5.0000 sec
SCANS 8
ADBT 16
RGAIN 38
BF 0.01 Hz
T1 0.00
T2 0.00
T3 90.00
T4 100.00
EXMOD single_pulse.ex2
IRNUC 1H
IFR 395.88 MHz
IRSET 6.28 KHz
IRFIN 0.87 Hz
IRRPW 115 usec
IRATN 79
DFILE TH-14-7-f41-50-L1.jdf
SF
LKSET 13.20 KHz
LKFIN 75.7 Hz
LKLEV 0
LGAIN 0
LKPIS 0
LKSG 0
CSPED 0 Hz
FILDC
FILDF
CTEMP 20.6 c
SLVNT CDCl3
EXREF 7.26 ppm
    
```

TH-14-7-f41-50C

C:\Documents and Settings\PC-USER\My Documents\Data\Hoshikawa\14\TH-14-7-f41-50C-L1.jdf

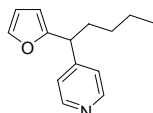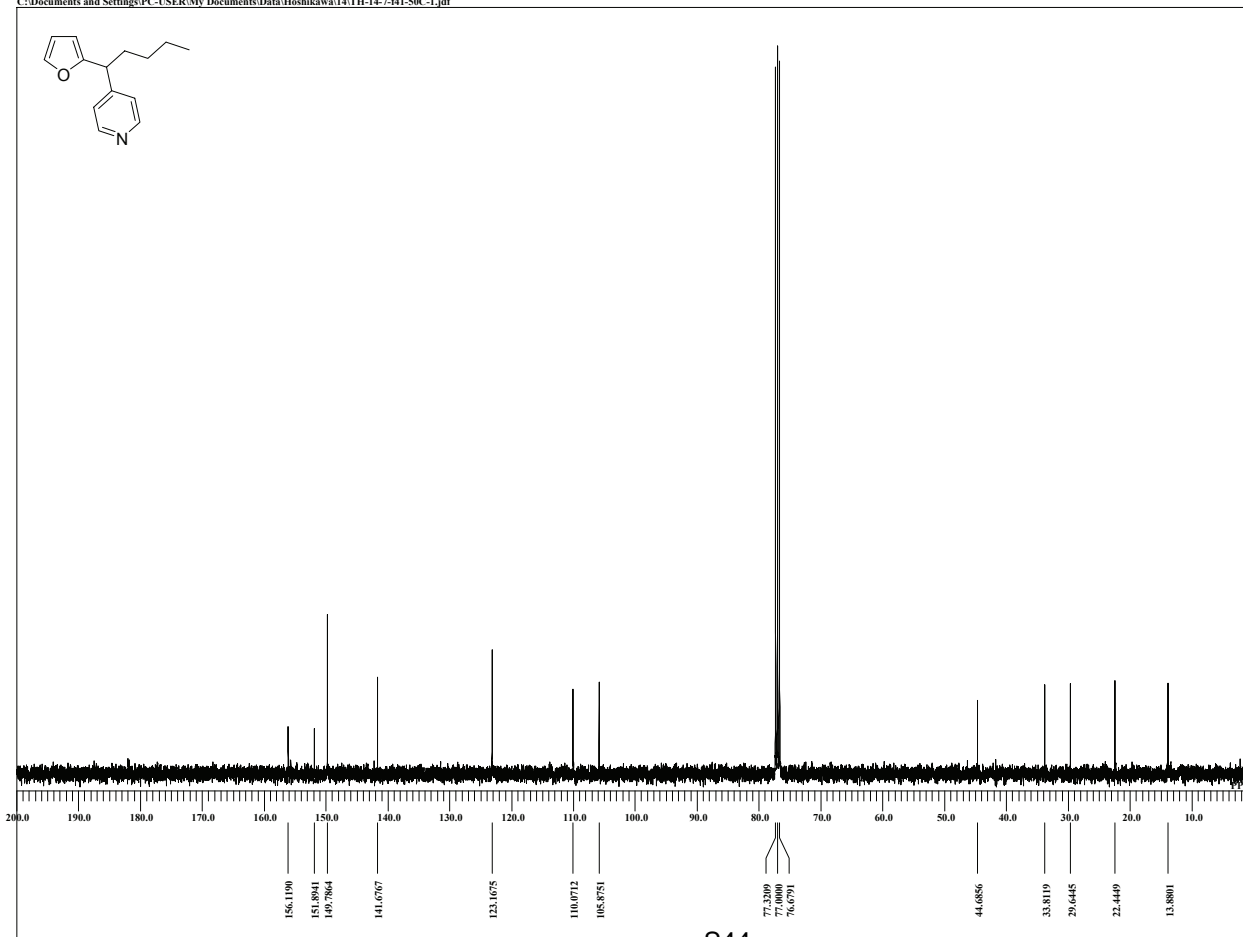

```

DFILE TH-14-7-f41-50C-L1.jdf
COMNT TH-14-7-f41-50C
DATIM 12-02-2013 19:08:37
MENUF
OBNUC
OFR 99.55 MHz
OBFREQ 99.55 MHz
OBSET 5.13 KHz
OBFIN 0.98 Hz
PWI 3.25 usec
DEADT 0.00 usec
PREDL 0.00000 msec
IWT 1.0000 sec
POINT 65536
SPO 65536
TIMES 42
DUMMY 4
FREQU 31250.00 Hz
FLT 125000 Hz
DELAY 20.20 usec
ACQTM 1.0486 sec
PD 8.0000 sec
SCANS 42
ADBT 16
RGAIN 60
BF 1.00 Hz
T1 0.00
T2 0.00
T3 90.00
T4 100.00
EXMOD single_pulse_dec
IRNUC 13C
IFR 99.55 MHz
IRSET 5.13 KHz
IRFIN 0.98 Hz
IRRPW 115 usec
IRATN 79
DFILE TH-14-7-f41-50C-L1.jdf
SF
LKSET 13.20 KHz
LKFIN 75.7 Hz
LKLEV 0
LGAIN 0
LKPIS 0
LKSG 0
CSPED 0 Hz
FILDC
FILDF
CTEMP 20.8 c
SLVNT CDCl3
EXREF 77.00 ppm
    
```

TH-13-189-f47-54

C:\Documents and Settings\PC-USER\My Documents\Data\Hoshikawa\13\TH-13-189-f47-54-1.xls

3ff

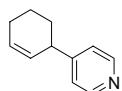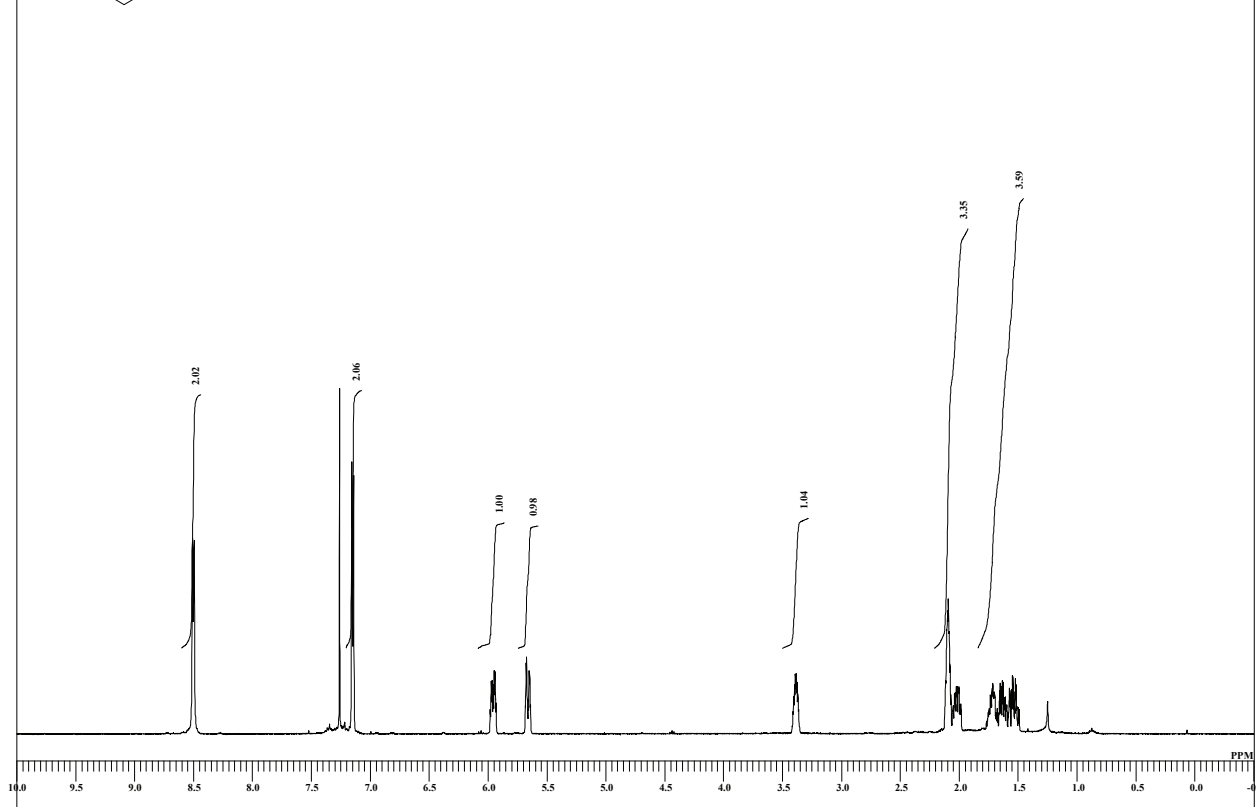

```

DFILE TH-13-189-f47-54-1.xls
COMNT TH-13-189-f47-54
DATIM 13-02-2013 20:40:30
MENUF
OBNUC 1H
OFR 395.88 MHz
OBFREQ 395.88 MHz
OBSET 6.28 KHz
OBFIN 0.87 Hz
PWI 6.38 usec
DEADT 0.00 usec
PREDL 0.00000 msec
IWT 1.0000 sec
POINT 16384
SPO 16384
TIMES 8
DUMMY 1
FREQU 7422.80 Hz
FLT 30000 Hz
DELAY 16.68 usec
ACQTM 2.2073 sec
PD 5.0000 sec
SCANS 8
ADBIT 16
RGAIN 42
BF 0.01 Hz
T1 0.00
T2 0.00
T3 90.00
T4 100.00
EXMOD single_pulse.ex2
IRNUC 1H
IFR 395.88 MHz
IRSET 6.28 kHz
IRFIN 0.87 Hz
IRRPW 115 usec
IRATN 79
DFILE TH-13-189-f47-54-1.xls
SF
LKSET 13.20 KHz
LKFIN 75.7 Hz
LKLEV 0
LGAIN 0
LKPHS 0
LKSG 0
CSPED 0 Hz
FILDC
FILDF
CTEMP 20.4 c
SLVNT CDCl3
EXREF 7.26 ppm
    
```

TH-13-189-f47-54C

C:\Documents and Settings\PC-USER\My Documents\Data\Hoshikawa\13\TH-13-189-f47-54C-1.xls

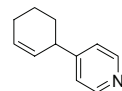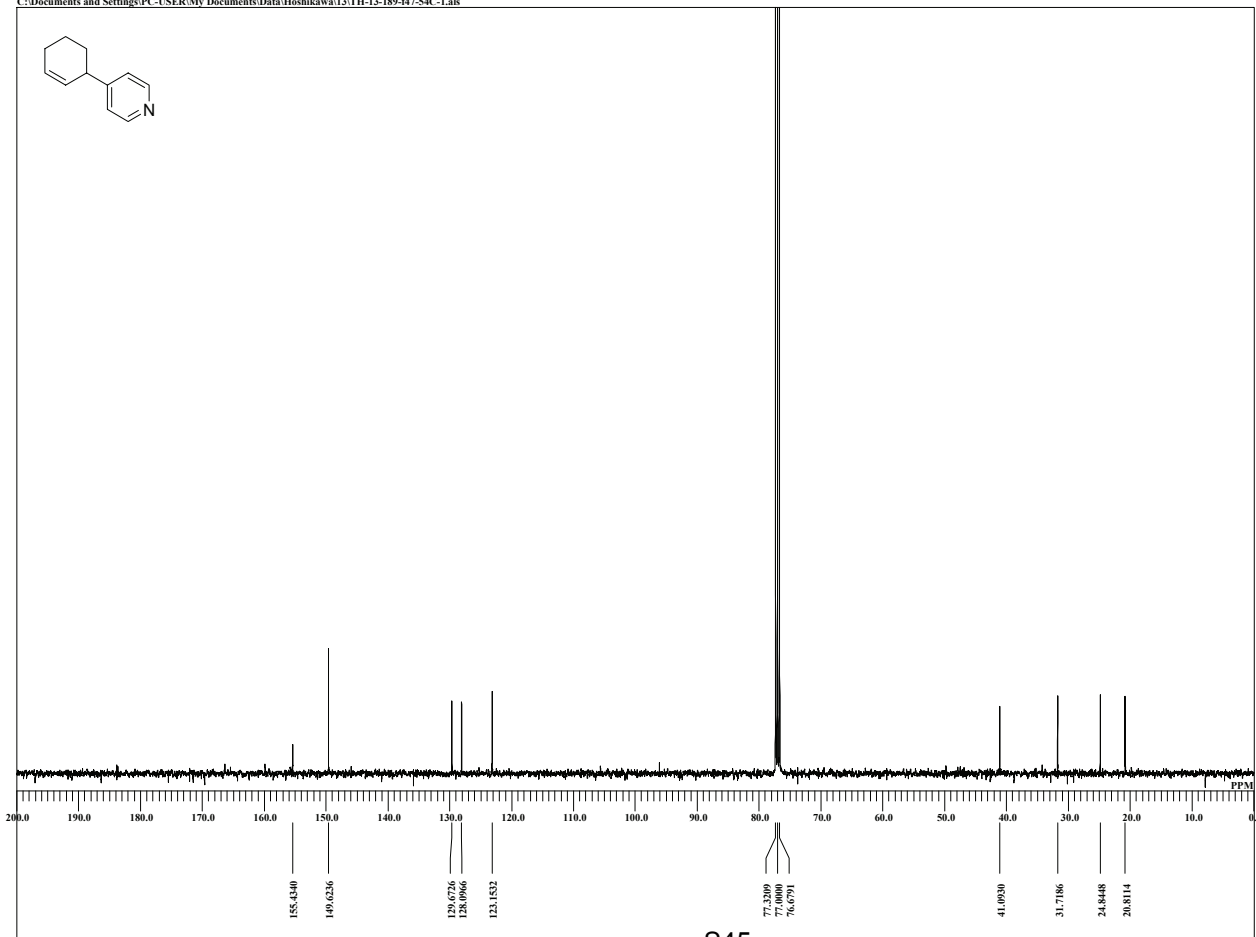

```

DFILE TH-13-189-f47-54C-1.xls
COMNT TH-13-189-f47-54C
DATIM 13-02-2013 20:49:03
MENUF
OBNUC 13C
OFR 99.55 MHz
OBFREQ 99.55 MHz
OBSET 5.13 KHz
OBFIN 0.98 Hz
PWI 3.25 usec
DEADT 0.00 usec
PREDL 0.00000 msec
IWT 1.0000 sec
POINT 52428
SPO 52428
TIMES 42
DUMMY 4
FREQU 24999.62 Hz
FLT 125000 Hz
DELAY 20.50 usec
ACQTM 1.0486 sec
PD 8.0000 sec
SCANS 42
ADBIT 16
RGAIN 60
BF 1.00 Hz
T1 0.00
T2 0.00
T3 90.00
T4 100.00
EXMOD single_pulse_dec
IRNUC 1H
IFR 395.88 MHz
IRSET 6.28 kHz
IRFIN 0.87 Hz
IRRPW 115 usec
IRATN 79
DFILE TH-13-189-f47-54C-1.xls
SF
LKSET 13.20 KHz
LKFIN 75.7 Hz
LKLEV 0
LGAIN 0
LKPHS 0
LKSG 0
CSPED 0 Hz
FILDC
FILDF
CTEMP 20.7 c
SLVNT CDCl3
EXREF 77.00 ppm
    
```

TH-12-37-f20-28

C:\Documents and Settings\PC-USER\My Documents\Data\Hoshikawa\12\TH-12-37-f20-28-1.Lab

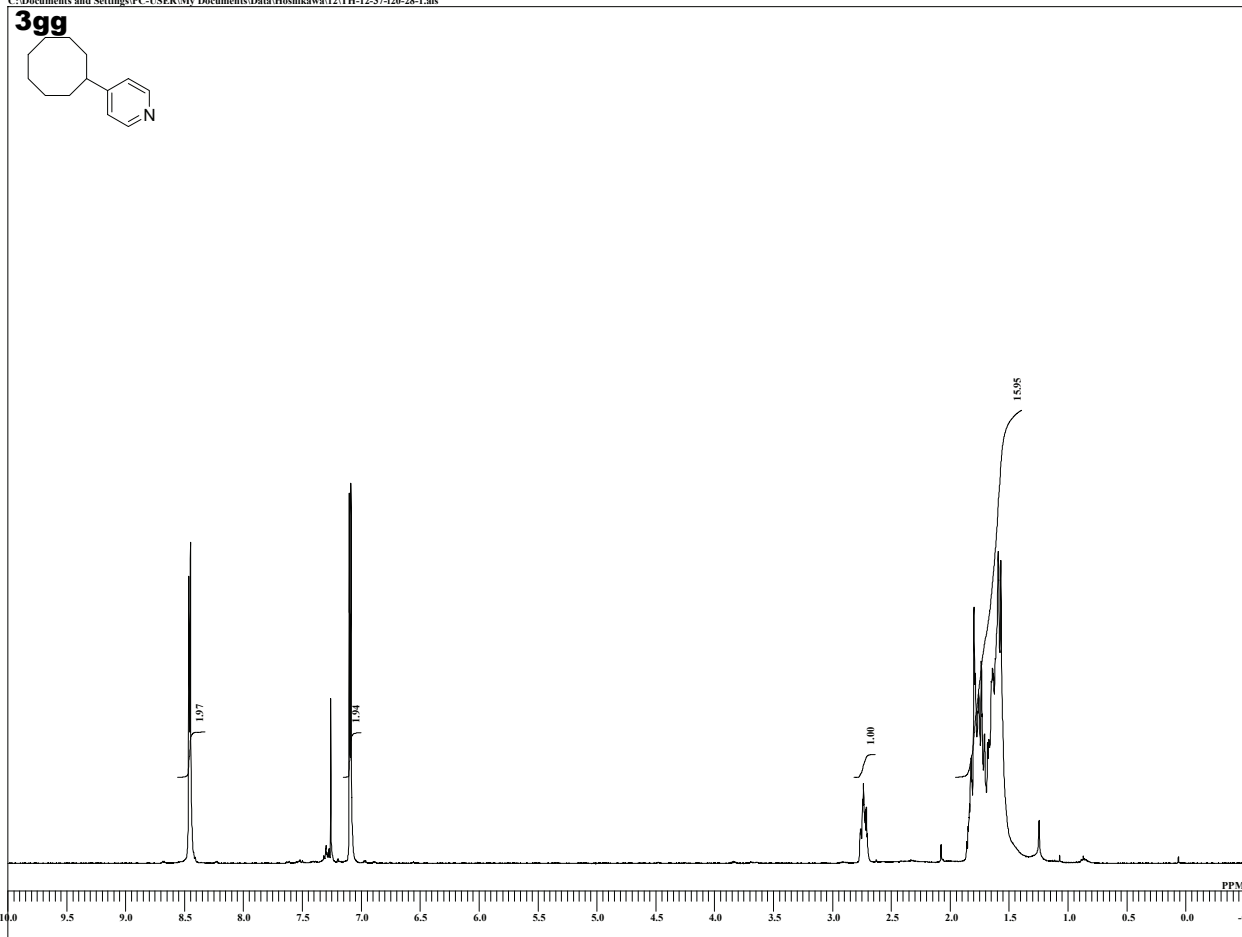

```

DFILE TH-12-37-f20-28-Lab
COMNT TH-12-37-f20-28
DATIM 26-06-2012 18:59:27
MENUF
OBNUC 1H
OFR 395.88 MHz
OBFREQ 395.88 MHz
OBSET 6.28 KHz
OBFIN 0.87 Hz
PWI 6.38 usec
DEADT 0.00 usec
PREDL 0.00000 msec
IWT 1.0000 sec
POINT 16384
SPO 16384
TIMES 8
DUMMY 1
FREQ 7422.80 Hz
FLT 30000 Hz
DELAY 16.68 usec
ACQTM 2.2073 sec
PD 5.0000 sec
SCANS 8
ADBIT 16
RGAIN 32
BF 0.01 Hz
T1 0.00
T2 0.00
T3 90.00
T4 100.00
EXMOD single_pulse.ex2
IRNUC 1H
IFR 395.88 MHz
IRSET 6.28 kHz
IRFIN 0.87 Hz
IRRPW 147 usec
IRATN 79
DFILE TH-12-37-f20-28-Lab
SF
LKSET 13.20 KHz
LKFIN 75.7 Hz
LKLEV 0
LGAIN 0
LKPHS 0
LKSG 0
CSPED 0 Hz
FILDC
FILDF
CTEMP 24.1 c
SLVNT CDCl3
EXREF 7.26 ppm
    
```

TH-12-37-f20-28C

C:\Documents and Settings\PC-USER\My Documents\Data\Hoshikawa\12\TH-12-37-f20-28C-1.jdf

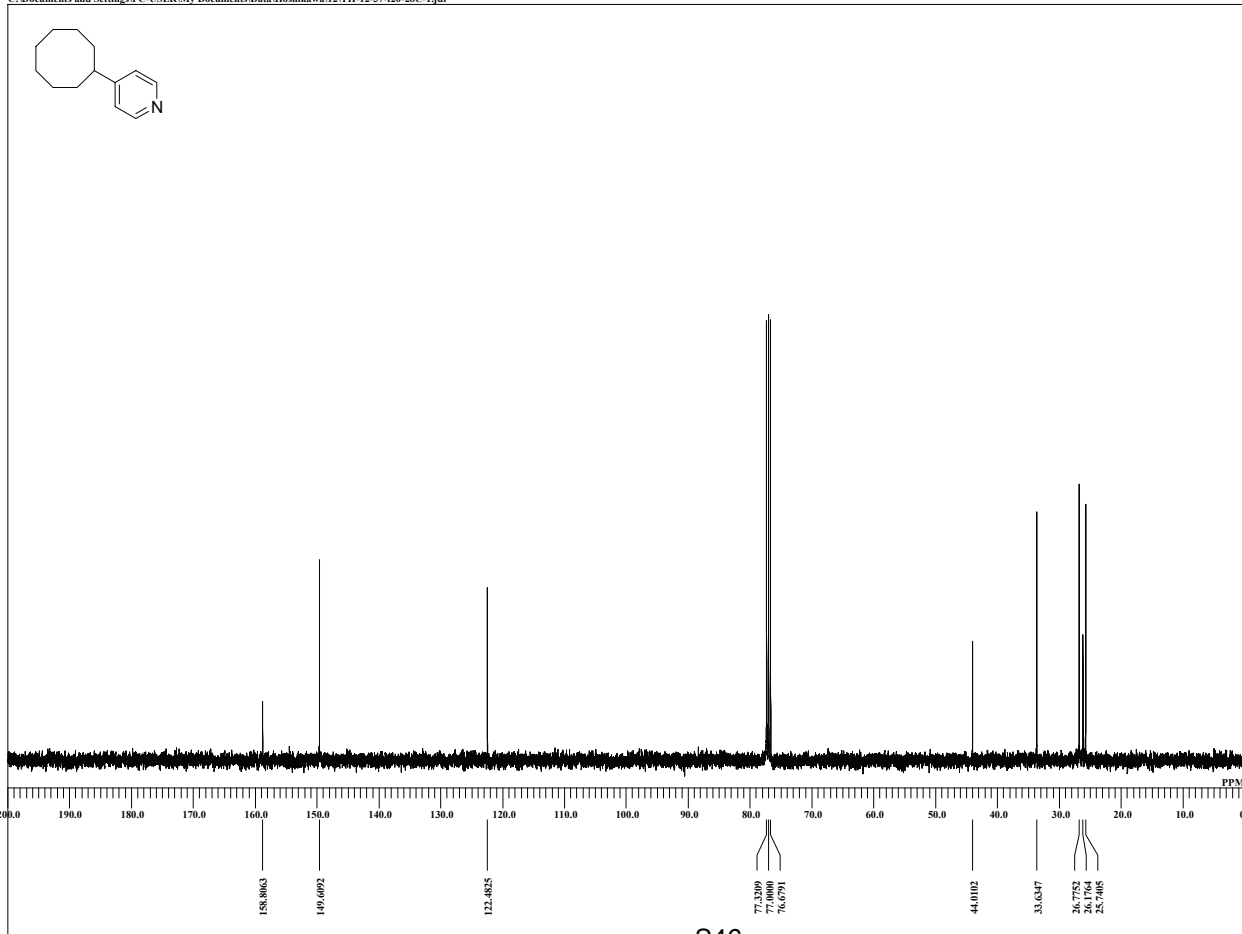

```

DFILE TH-12-37-f20-28C-1.jdf
COMNT TH-12-37-f20-28C
DATIM 26-06-2012 19:03:52
MENUF
OBNUC 13C
OFR 99.55 MHz
OBFREQ 99.55 MHz
OBSET 5.13 KHz
OBFIN 0.98 Hz
PWI 3.25 usec
DEADT 0.00 usec
PREDL 0.00000 msec
IWT 1.0000 sec
POINT 65536
SPO 65536
TIMES 34
DUMMY 4
FREQ 31250.00 Hz
FLT 125000 Hz
DELAY 20.50 usec
ACQTM 1.0486 sec
PD 5.0000 sec
SCANS 34
ADBIT 16
RGAIN 60
BF 1.00 Hz
T1 0.00
T2 0.00
T3 90.00
T4 100.00
EXMOD single_pulse_dec
IRNUC 1H
IFR 395.88 MHz
IRSET 6.28 kHz
IRFIN 0.87 Hz
IRRPW 115 usec
IRATN 79
DFILE TH-12-37-f20-28C-1.jdf
SF
LKSET 13.20 KHz
LKFIN 75.7 Hz
LKLEV 0
LGAIN 0
LKPHS 0
LKSG 0
CSPED 0 Hz
FILDC
FILDF
CTEMP 24.3 c
SLVNT CDCl3
EXREF 77.00 ppm
    
```

TH-13-187-f35-44-product-H

C:\Documents and Settings\PC-USER\My Documents\Data\Hoshikawa\13\TH-13-187-f35-44-product-H-1.xls

3hh

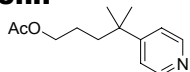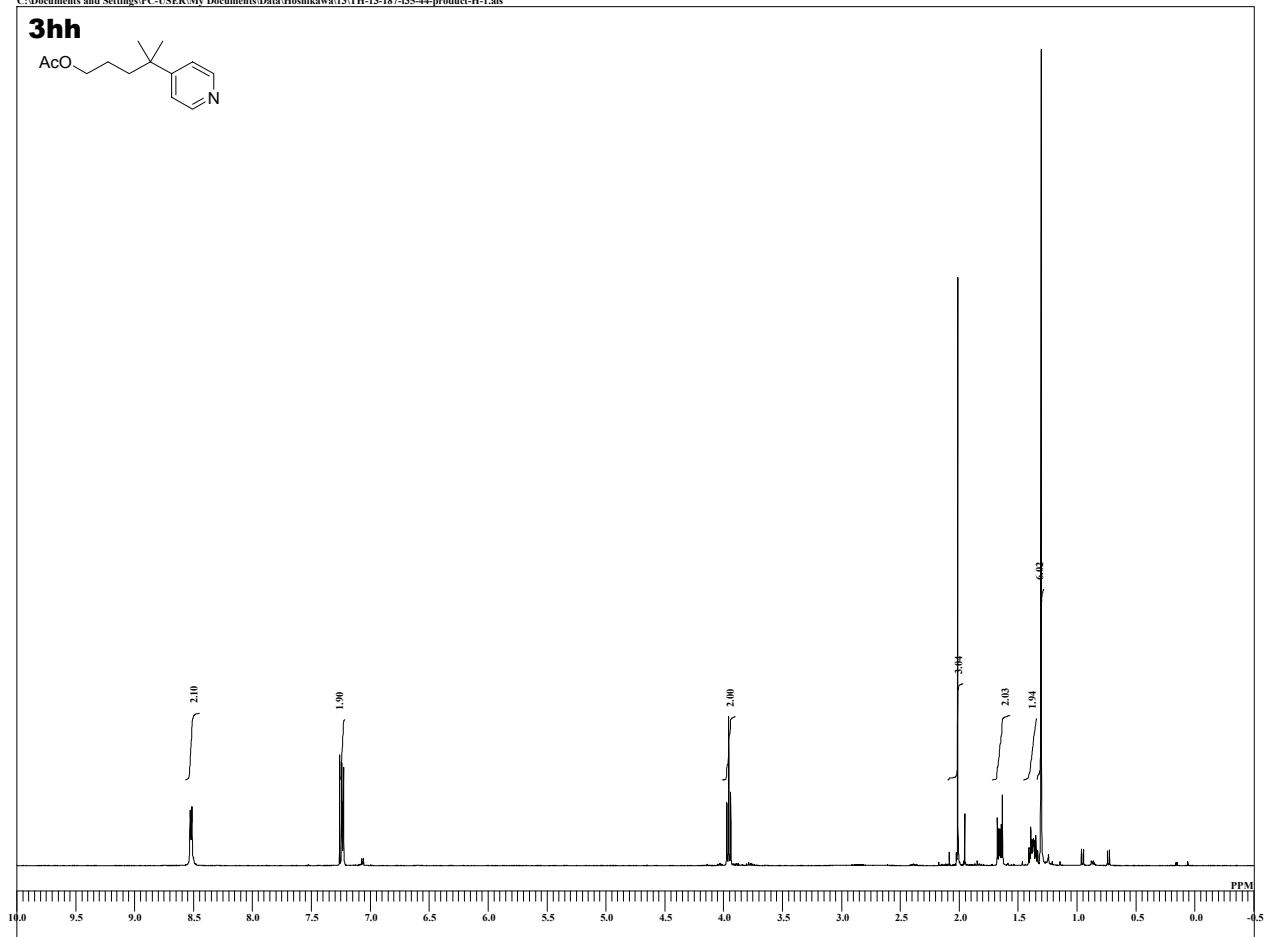

```

DFILE TH-13-187-f35-44-product-H-1.xls
COMNT TH-13-187-f35-44-product-H
DATIM 30-11-2012 12:59:32
MENUF
OBNUC 1H
OFR 395.88 MHz
OBFREQ 395.88 MHz
OBSET 6.28 KHz
OBFIN 0.87 Hz
PWI 6.38 usec
DEADT 0.00 usec
PREDL 0.00000 msec
IWT 1.0000 sec
POINT 13107
SPO 13107
TIMES 8
DUMMY 1
FREQU 5938.15 Hz
FLT 30000 Hz
DELAY 16.68 usec
ACQTM 2.2073 sec
PD 5.0000 sec
SCANS 8
ADBIT 16
RGAIN 38
BF 0.01 Hz
T1 0.00
T2 0.00
T3 90.00
T4 100.00
EXMOD single_pulse.ex2
EXPFCM
IRNUC 1H
IFR 395.88 MHz
IRSET 6.28 kHz
IRFIN 0.87 Hz
IRRPW 115 usec
IRATN 79
DFILE TH-13-187-f35-44-product-H-1.xls
SF
LKSET 13.20 KHz
LKFIN 75.7 Hz
LKLEV 0
LGAIN 0
LKPBS 0
LKSG 0
CSPED 0 Hz
FILDC
FILDF
CTEMP 20.7 c
SLVNT CDCl3
EXREF 7.26 ppm
    
```

TH-13-187-f35-44-product-C

C:\Documents and Settings\PC-USER\My Documents\Data\Hoshikawa\13\TH-13-187-f35-44-product-C-1.jdf

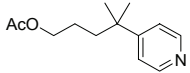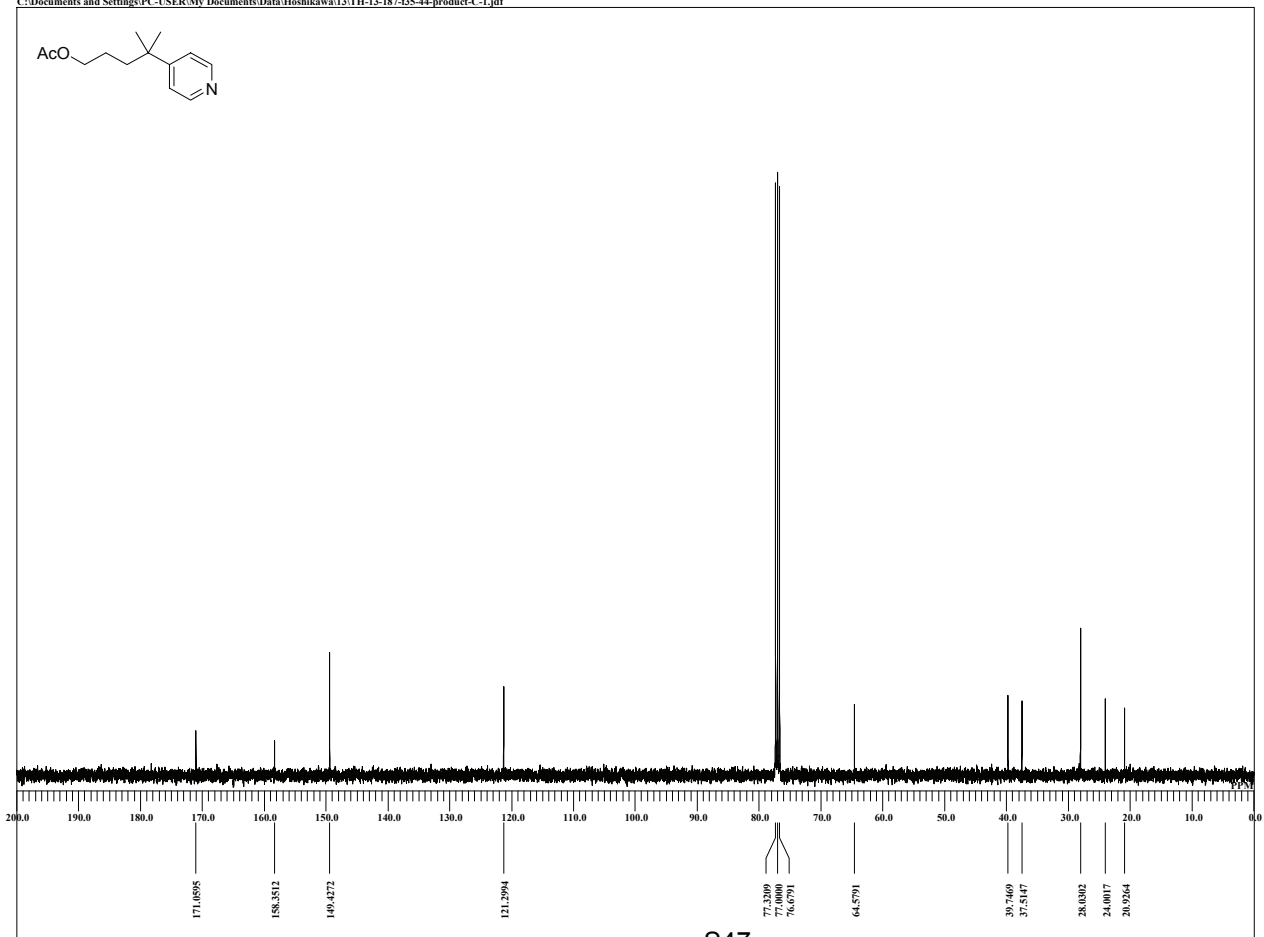

```

DFILE TH-13-187-f35-44-product-C-1.jdf
COMNT TH-13-187-f35-44-product-C
DATIM 30-11-2012 13:07:19
MENUF
OBNUC 13C
OFR 99.55 MHz
OBFREQ 99.55 MHz
OBSET 5.13 KHz
OBFIN 0.98 Hz
PWI 3.25 usec
DEADT 0.00 usec
PREDL 0.00000 msec
IWT 1.0000 sec
POINT 65536
SPO 65536
TIMES 42
DUMMY 4
FREQU 31250.00 Hz
FLT 125000 Hz
DELAY 20.50 usec
ACQTM 1.0486 sec
PD 8.0000 sec
SCANS 42
ADBIT 16
RGAIN 60
BF 1.00 Hz
T1 0.00
T2 0.00
T3 90.00
T4 100.00
EXMOD single_pulse_dec
EXPFCM
IRNUC 1H
IFR 395.88 MHz
IRSET 6.28 kHz
IRFIN 0.87 Hz
IRRPW 115 usec
IRATN 79
DFILE TH-13-187-f35-44-product-C-1.jdf
SF
LKSET 13.20 KHz
LKFIN 75.7 Hz
LKLEV 0
LGAIN 0
LKPBS 0
LKSG 0
CSPED 0 Hz
FILDC
FILDF
CTEMP 20.9 c
SLVNT CDCl3
EXREF 77.00 ppm
    
```
